# Supplementary material for: Comprehensive Identification of Ginsenosides in the Roots and Rhizomes of Panax ginseng Based on Their Molecular Features-Oriented Precursor Ions Selection and Targeted MS/MS Analysis
Source: MDPI journal article supplement (doi:10.3390/molecules28030941), 2023-01-17
Supplement: s1 [file s1]

Hong-Ping Wang <sup>1,\*</sup>, Zi-Jian Wang <sup>1</sup>, Jing Du <sup>1</sup>, Zhao-Zhou Lin <sup>2</sup>, Chen Zhao <sup>1</sup>,  
Run Zhang <sup>3</sup>, Qiong Yin <sup>1</sup>, Chun-Lan Fan <sup>2</sup>, Ping Peng <sup>1</sup> and Zhi-Bin Wang <sup>1</sup>

<sup>1</sup> Scientific Research Institute of Beijing Tongrentang Co., Ltd., Beijing 100011, China

<sup>2</sup> Beijing Tongrentang Technology Development Co., Ltd., Beijing 100079, China

<sup>3</sup> Beijing Zhongyan Tongrentang Pharmaceutical R & D Co., Ltd., Beijing 100000, China

\* Correspondence: sungirl9626@163.com; Tel./Fax: +86-10-87632655

## Supplementary Information

**Table S1.** The isolated ginsenosides from the roots and rhizomes of *panax ginseng*

| No.                                     | Ginsenosides                | R <sub>1</sub>                                                                       | R <sub>2</sub>              | C <sub>20</sub> | Molecular<br>formula                             | Molecular<br>weight | The calculated<br>exact mass of<br>[M-H] <sup>-</sup> ion |
|-----------------------------------------|-----------------------------|--------------------------------------------------------------------------------------|-----------------------------|-----------------|--------------------------------------------------|---------------------|-----------------------------------------------------------|
| <b>The protopanaxadiol ginsenosides</b> |                             |                                                                                      |                             |                 |                                                  |                     |                                                           |
|                                         |                             | 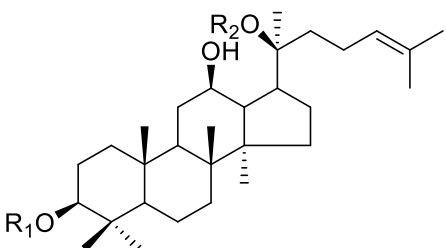 |                             |                 |                                                  |                     |                                                           |
|                                         |                             | 20(S)-protopanaxadiol                                                                |                             |                 |                                                  |                     |                                                           |
| 1                                       | ginsenoside Ra <sub>1</sub> | -glc(2-1)glc                                                                         | -glc(6-1)ara(p)(4-1)<br>xyl | S               | C <sub>58</sub> H <sub>98</sub> O <sub>26</sub>  | 1210                | 1209.6268                                                 |
| 2                                       | ginsenoside Ra <sub>2</sub> | -glc(2-1)glc                                                                         | -glc(6-1)ara(f)(2-1)<br>xyl | S               | C <sub>58</sub> H <sub>98</sub> O <sub>26</sub>  | 1210                | 1209.6268                                                 |
| 3                                       | ginsenoside Ra <sub>3</sub> | -glc(2-1)glc                                                                         | -glc(6-1)glc(3-1)<br>xyl    | S               | C <sub>59</sub> H <sub>100</sub> O <sub>27</sub> | 1240                | 1239.6374                                                 |
| 4                                       | ginsenoside Ra <sub>4</sub> | -glc(2-1)glc(6)(E)-<br>but-2-enoyl                                                   | -glc(6-1)ara(p)(4-1)<br>xyl | S               | C <sub>62</sub> H <sub>102</sub> O <sub>27</sub> | 1278                | 1277.6530                                                 |
| 5                                       | ginsenoside Ra <sub>5</sub> | -glc(2-1)glc(6)-ace                                                                  | -glc(6-1)ara(p)(4-1)        | S               | C <sub>60</sub> H <sub>100</sub> O <sub>27</sub> | 1252                | 1251.6374                                                 |

|    |                                        | tyl                                | ) xyl                    |   |                                                  |      |           |
|----|----------------------------------------|------------------------------------|--------------------------|---|--------------------------------------------------|------|-----------|
| 6  | ginsenoside Ra <sub>6</sub>            | -glc(2-1)glc(6)(E)-<br>but-2-enoyl | -glc(6-1)glc             | S | C <sub>58</sub> H <sub>96</sub> O <sub>24</sub>  | 1176 | 1175.6213 |
| 7  | ginsenoside Ra <sub>7</sub>            | -glc(2-1)glc(6)(E)-<br>but-2-enoyl | -glc(6-1)ara(p)          | S | C <sub>57</sub> H <sub>94</sub> O <sub>23</sub>  | 1146 | 1145.6108 |
| 8  | ginsenoside Ra <sub>8</sub>            | -glc(2-1)glc(4)(E)-<br>but-2-enoyl | -glc(6-1)ara(f)          | S | C <sub>57</sub> H <sub>94</sub> O <sub>23</sub>  | 1146 | 1145.6108 |
| 9  | ginsenoside Ra <sub>9</sub>            | -glc(2-1)glc(6)(E)-<br>but-2-enoyl | -glc(6-1)ara(f)          | S | C <sub>57</sub> H <sub>94</sub> O <sub>23</sub>  | 1146 | 1145.6108 |
| 10 | ginsenoside Rb <sub>1</sub>            | -glc(2-1)glc                       | -glc(6-1)glc             | S | C <sub>54</sub> H <sub>92</sub> O <sub>23</sub>  | 1108 | 1107.5951 |
| 11 | ginsenoside Rb <sub>2</sub>            | -glc(2-1)glc                       | -glc(6-1)ara(p)          | S | C <sub>53</sub> H <sub>90</sub> O <sub>22</sub>  | 1078 | 1077.5845 |
| 12 | ginsenoside Rb <sub>3</sub>            | -glc(2-1)glc                       | -glc(6-1)xyl             | S | C <sub>53</sub> H <sub>90</sub> O <sub>22</sub>  | 1078 | 1077.5845 |
| 13 | ginsenoside Rc                         | -glc(2-1)glc                       | -glc(6-1)ara(f)          | S | C <sub>53</sub> H <sub>90</sub> O <sub>22</sub>  | 1078 | 1077.5845 |
| 14 | ginsenoside Rd                         | -glc(2-1)glc                       | -glc                     | S | C <sub>48</sub> H <sub>82</sub> O <sub>18</sub>  | 946  | 945.5423  |
| 15 | ginsenoside Rg <sub>3</sub>            | -glc(2-1)glc                       | -H                       | S | C <sub>42</sub> H <sub>72</sub> O <sub>13</sub>  | 784  | 783.4895  |
| 16 | ginsenoside Rh <sub>2</sub>            | -glc                               | -H                       | S | C <sub>36</sub> H <sub>62</sub> O <sub>8</sub>   | 622  | 621.4366  |
| 17 | malonyl-ginsenoside Rb <sub>1</sub>    | -glc(2-1)glc(6)ma                  | -glc(6-1)glc             | S | C <sub>57</sub> H <sub>94</sub> O <sub>26</sub>  | 1194 | 1193.5955 |
| 18 | malonyl-ginsenoside Rb <sub>2</sub>    | -glc(2-1)glc(6)ma                  | -glc(6-1)ara(p)          | S | C <sub>56</sub> H <sub>92</sub> O <sub>25</sub>  | 1164 | 1163.5849 |
| 19 | malonyl-ginsenoside Rc                 | -glc(2-1)glc(6)ma                  | -glc(6-1)ara(f)          | S | C <sub>56</sub> H <sub>92</sub> O <sub>25</sub>  | 1164 | 1163.5849 |
| 20 | malonyl-ginsenoside Rd                 | -glc(2-1)glc(6)ma                  | -glc                     | S | C <sub>51</sub> H <sub>84</sub> O <sub>21</sub>  | 1032 | 1031.5427 |
| 21 | malonyl-ginsenoside Ra <sub>3</sub>    | -glc(2-1)glc(6)ma                  | -glc(6-1)glc(3-1)<br>xyl | S | C <sub>62</sub> H <sub>102</sub> O <sub>30</sub> | 1326 | 1325.6378 |
| 22 | malonyl-notoginsenoside R <sub>4</sub> | -glc(2-1)glc(6)ma                  | -glc(6-1)glc(6-1)<br>xyl | S | C <sub>62</sub> H <sub>102</sub> O <sub>30</sub> | 1326 | 1325.6378 |
| 23 | notoginsenoside R <sub>4</sub>         | -glc(2-1)glc                       | -glc(6-1)glc(6-1)<br>xyl | S | C <sub>59</sub> H <sub>100</sub> O <sub>27</sub> | 1240 | 1239.6374 |
| 24 | ginsenoside Rs <sub>1</sub>            | -glc(2-1)glc(6)Ac                  | -glc(6-1)ara(p)          | S | C <sub>55</sub> H <sub>92</sub> O <sub>23</sub>  | 1120 | 1119.5951 |

|    |                                   |                   |                 |   |                                                 |      |           |
|----|-----------------------------------|-------------------|-----------------|---|-------------------------------------------------|------|-----------|
| 25 | ginsenoside Rs <sub>2</sub>       | -glc(2-1)glc(6)Ac | -glc(6-1)ara(f) | S | C <sub>55</sub> H <sub>92</sub> O <sub>23</sub> | 1120 | 1119.5951 |
| 26 | gypenoside XVII                   | -glc              | -glc(6-1)glc    | S | C <sub>48</sub> H <sub>82</sub> O <sub>18</sub> | 946  | 945.5423  |
| 27 | pseudoginsenoside RC <sub>1</sub> | -glc(2-1)glc(6)Ac | -glc            | S | C <sub>50</sub> H <sub>84</sub> O <sub>19</sub> | 988  | 987.5529  |
| 28 | quinquenoside R <sub>1</sub>      | -glc(2-1)glc(6)Ac | -glc(6-1)glc    | S | C <sub>56</sub> H <sub>94</sub> O <sub>24</sub> | 1150 | 1149.6057 |
| 29 | Vina-ginsenoside R <sub>16</sub>  | -glc(2-1)xyl      | -glc            | S | C <sub>47</sub> H <sub>80</sub> O <sub>17</sub> | 916  | 915.5317  |

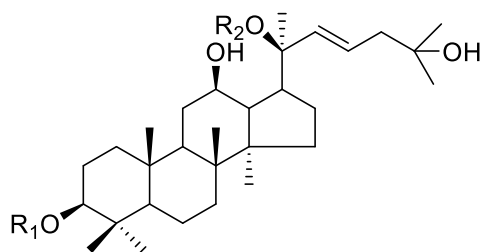

20(*S*)-protopanaxadiol

|    |                                 |              |              |   |                                                 |      |           |
|----|---------------------------------|--------------|--------------|---|-------------------------------------------------|------|-----------|
| 30 | koryoginsenoside R <sub>2</sub> | -glc(2-1)glc | -glc(6-1)glc | S | C <sub>54</sub> H <sub>92</sub> O <sub>24</sub> | 1124 | 1123.5900 |
|----|---------------------------------|--------------|--------------|---|-------------------------------------------------|------|-----------|

### The protopanaxatriol ginsenosides

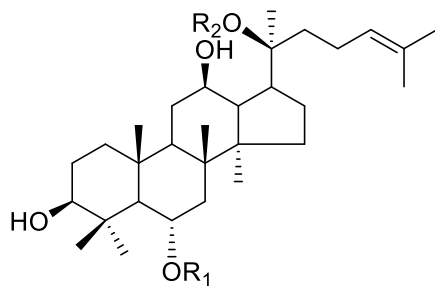

20(*S*)-protopanaxatriol

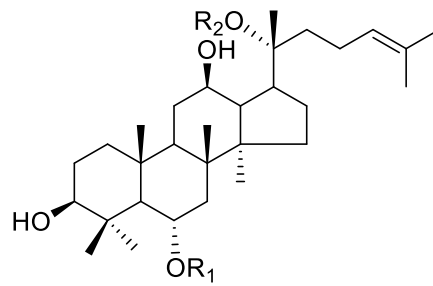

20(*R*)-protopanaxatriol

|    |                             |              |                                 |   |                                                 |     |          |
|----|-----------------------------|--------------|---------------------------------|---|-------------------------------------------------|-----|----------|
| 31 | ginsenoside Re              | -glc(2-1)rha | -glc                            | S | C <sub>48</sub> H <sub>82</sub> O <sub>18</sub> | 946 | 945.5423 |
| 32 | ginsenoside Re <sub>1</sub> | -glc         | -glc(3-1)glc                    | S | C <sub>48</sub> H <sub>82</sub> O <sub>19</sub> | 962 | 961.5372 |
| 33 | ginsenoside Re <sub>2</sub> | -glc(3-1)glc | -glc                            | S | C <sub>48</sub> H <sub>82</sub> O <sub>19</sub> | 962 | 961.5372 |
| 34 | ginsenoside Re <sub>3</sub> | -glc         | -glc(4-1)glc                    | S | C <sub>48</sub> H <sub>82</sub> O <sub>19</sub> | 962 | 961.5372 |
| 35 | ginsenoside Re <sub>4</sub> | -glc         | -glc(6-1)ara(f)                 | S | C <sub>47</sub> H <sub>80</sub> O <sub>18</sub> | 932 | 931.5266 |
| 36 | ginsenoside Re <sub>6</sub> | -glc         | -glc(6)( <i>E</i> )-but-2-enoyl | S | C <sub>46</sub> H <sub>76</sub> O <sub>15</sub> | 868 | 867.5106 |

|    |                                             |                                     |      |   |                                                 |     |          |
|----|---------------------------------------------|-------------------------------------|------|---|-------------------------------------------------|-----|----------|
| 37 | ginsenoside Rf                              | -glc(2-1)glc                        | H    | S | C <sub>42</sub> H <sub>72</sub> O <sub>14</sub> | 800 | 799.4844 |
| 38 | ginsenoside Rg <sub>1</sub>                 | -glc                                | -glc | S | C <sub>42</sub> H <sub>72</sub> O <sub>14</sub> | 800 | 799.4844 |
| 39 | ginsenoside Rg <sub>2</sub>                 | -glc(2-1)rha                        | -H   | S | C <sub>42</sub> H <sub>72</sub> O <sub>13</sub> | 784 | 783.4895 |
| 40 | 20-( <i>R</i> )-ginsenoside Rg <sub>2</sub> | -glc(2-1)rha                        | -H   | R | C <sub>42</sub> H <sub>72</sub> O <sub>13</sub> | 784 | 783.4895 |
| 41 | 20-gluco-ginsenoside Rf                     | -glc(2-1)glc                        | -glc | S | C <sub>48</sub> H <sub>82</sub> O <sub>19</sub> | 962 | 961.5372 |
| 42 | ginsenoside Rh <sub>1</sub>                 | -glc                                | -H   | S | C <sub>36</sub> H <sub>62</sub> O <sub>9</sub>  | 638 | 637.4316 |
| 43 | notoginsenoside R <sub>1</sub>              | -glc(2-1)xyl                        | -glc | S | C <sub>47</sub> H <sub>80</sub> O <sub>18</sub> | 932 | 931.5266 |
| 44 | notoginsenoside R <sub>2</sub>              | -glc(2-1)xyl                        | -H   | S | C <sub>41</sub> H <sub>70</sub> O <sub>13</sub> | 770 | 769.4738 |
| 45 | koryoginsenoside R <sub>1</sub>             | -glc(6)( <i>E</i> )-but-2-en<br>oyl | -glc | S | C <sub>46</sub> H <sub>76</sub> O <sub>15</sub> | 868 | 867.5106 |
| 46 | yesanchinoside D                            | -glc(6)Ac                           | -glc | S | C <sub>44</sub> H <sub>74</sub> O <sub>15</sub> | 842 | 841.4949 |
| 47 | notoginsenoside N                           | -glc(4-1)glc                        | -glc | S | C <sub>48</sub> H <sub>82</sub> O <sub>19</sub> | 962 | 961.5372 |

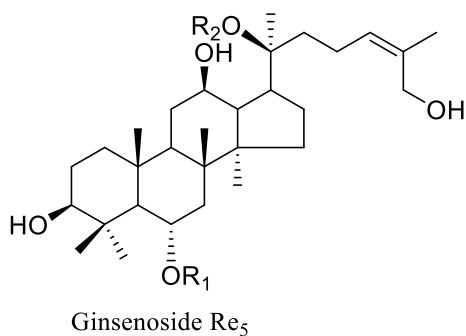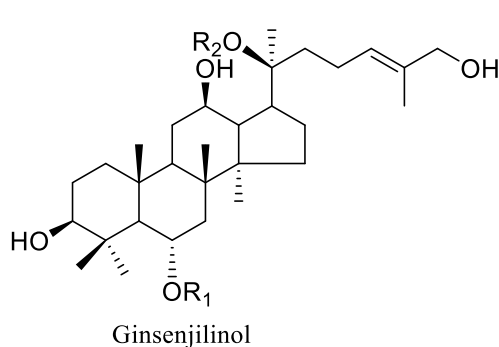

|    |                             |              |    |   |                                                 |     |          |
|----|-----------------------------|--------------|----|---|-------------------------------------------------|-----|----------|
| 48 | ginsenoside Re <sub>5</sub> | -glc(2-1)glc | -H | S | C <sub>42</sub> H <sub>72</sub> O <sub>15</sub> | 816 | 815.4793 |
| 49 | ginsenjilanol               | -glc(2-1)glc | -H | S | C <sub>42</sub> H <sub>72</sub> O <sub>15</sub> | 816 | 815.4793 |

### The protopanaxadiol ginsenosides

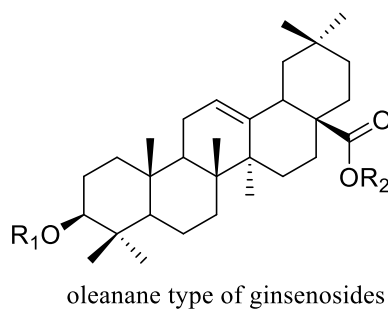

|    |                                 |                                                                                   |      |   |                                                  |      |           |
|----|---------------------------------|-----------------------------------------------------------------------------------|------|---|--------------------------------------------------|------|-----------|
| 50 | ginsenoside Ro                  | -glu A(2-1)glc                                                                    | -glc | - | C <sub>48</sub> H <sub>76</sub> O <sub>19</sub>  | 956  | 955.4903  |
| 51 | polyacetyleneginse<br>noside-Ro | 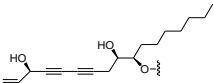 | -H   | - | C <sub>65</sub> H <sub>100</sub> O <sub>21</sub> | 1216 | 1215.6679 |

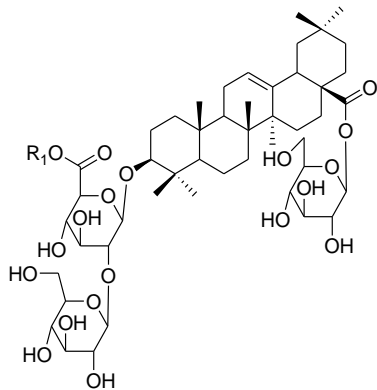

|    |                                |    |    |   |                                                 |     |          |
|----|--------------------------------|----|----|---|-------------------------------------------------|-----|----------|
| 52 | ginsenoside Ro<br>methyl ester | Me | -H | - | C <sub>49</sub> H <sub>78</sub> O <sub>19</sub> | 970 | 969.5059 |
|----|--------------------------------|----|----|---|-------------------------------------------------|-----|----------|

ara(p):  $\alpha$ -L-arabinopyranosyl; ara(f):  $\alpha$ -L-arabinofuranosyl; glc:  $\beta$ -D-glucopyranoside; xyl:  $\beta$ -D-xylopyranoside.

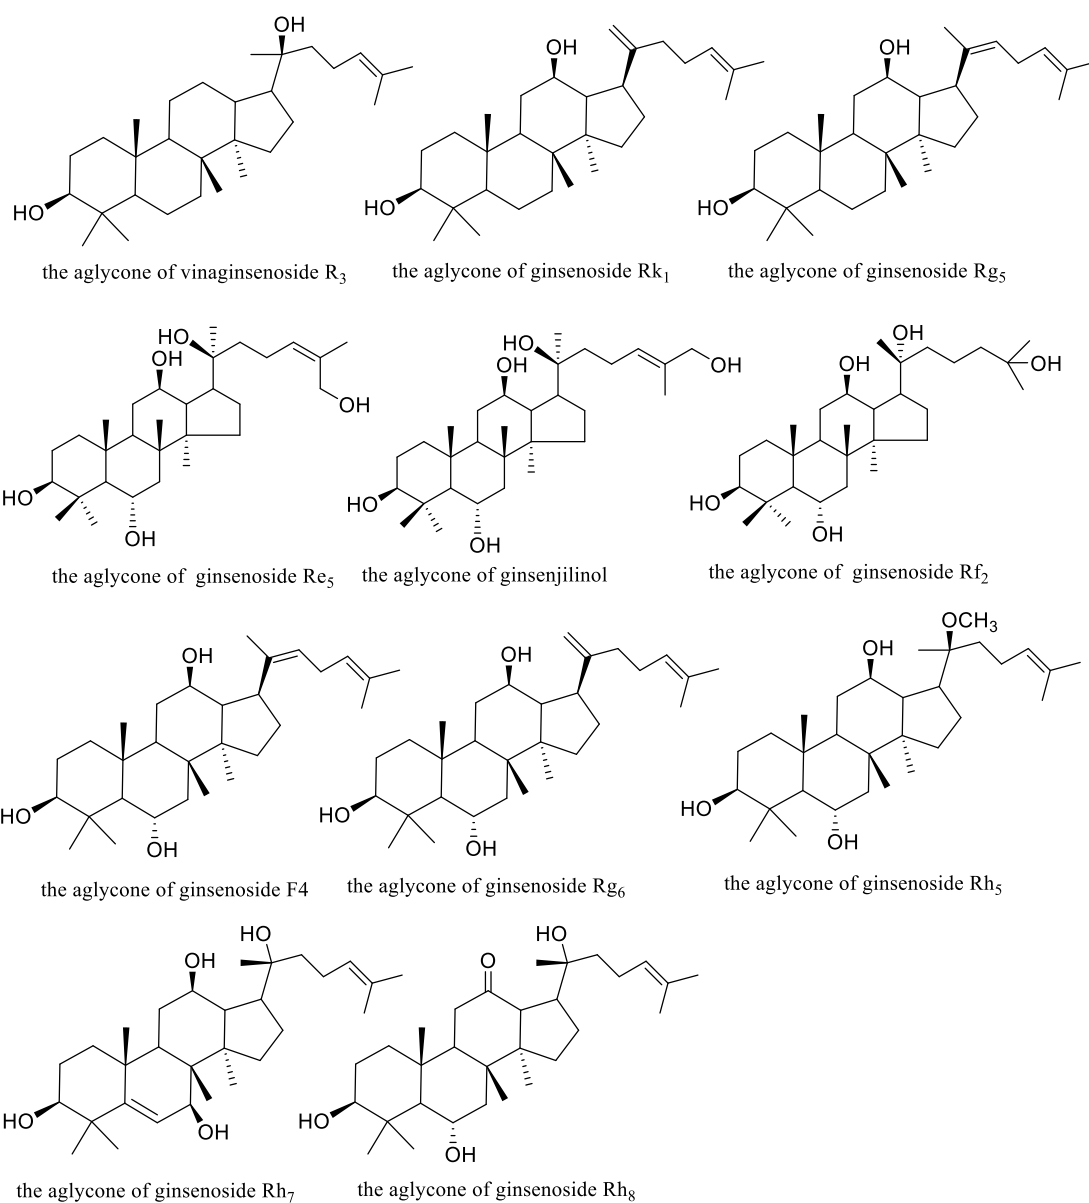

**Figure S1.** The aglycones of part of ginsenosides identified in the extract of *panax ginseng*.

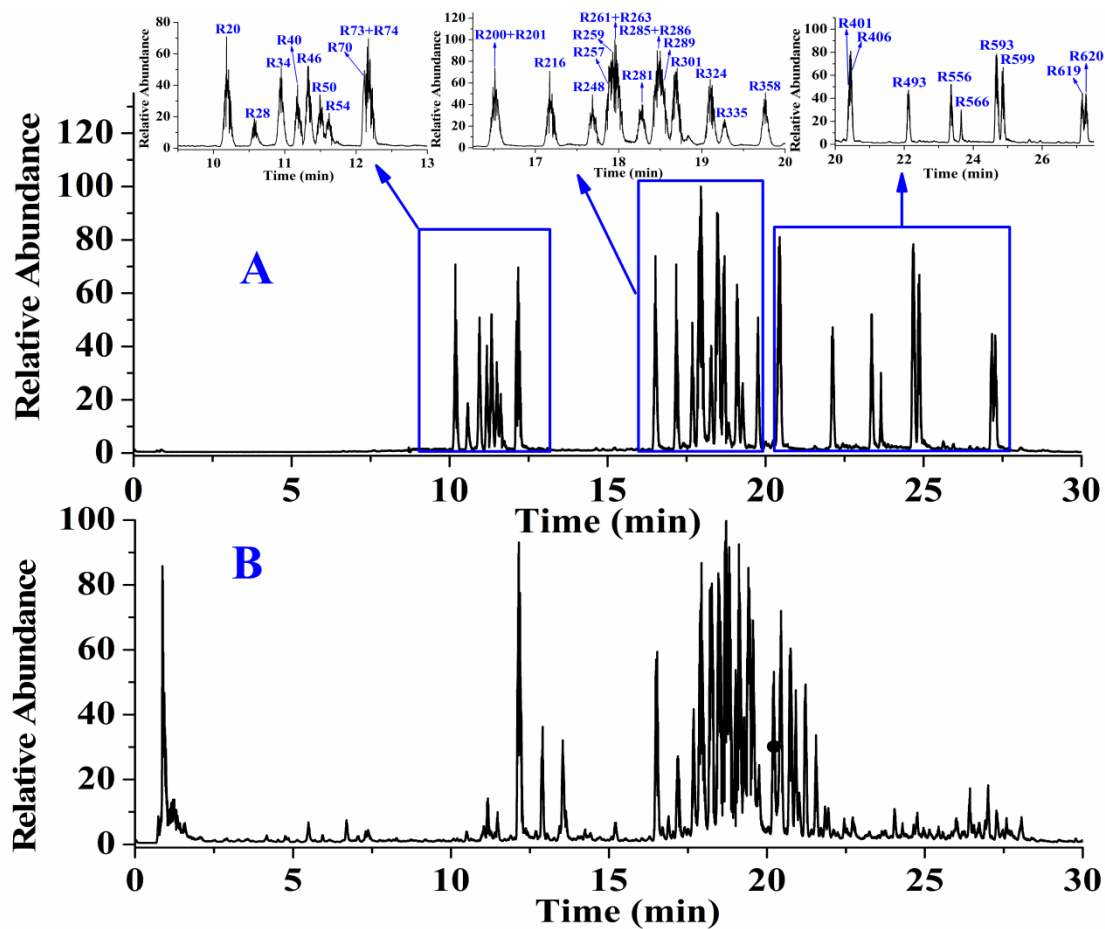

Figure S2. Total ion chromatograms of 35 reference standards (A) and the extract of RRPG (B).

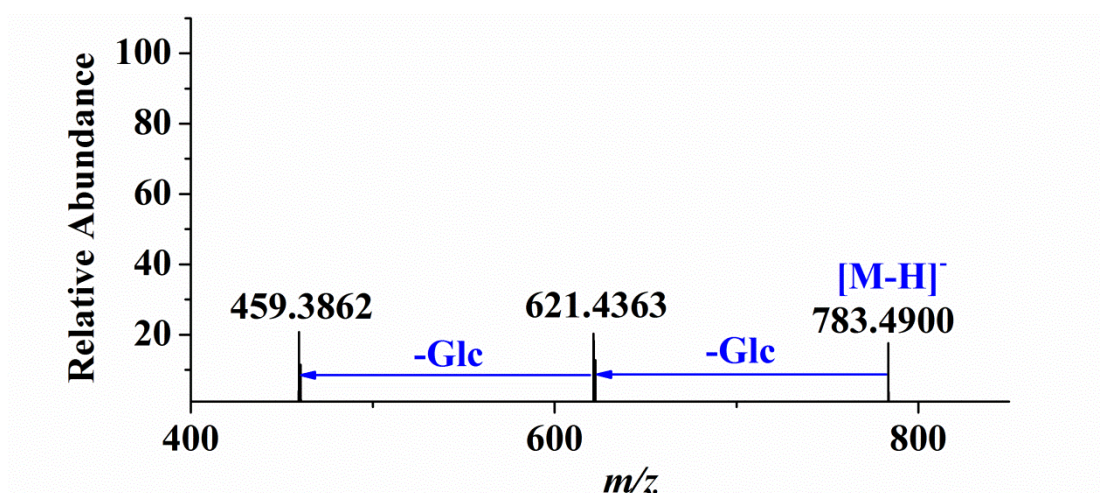

Figure S3. The MS/MS spectrum of the reference standard ginsenoside Rg<sub>3</sub>.

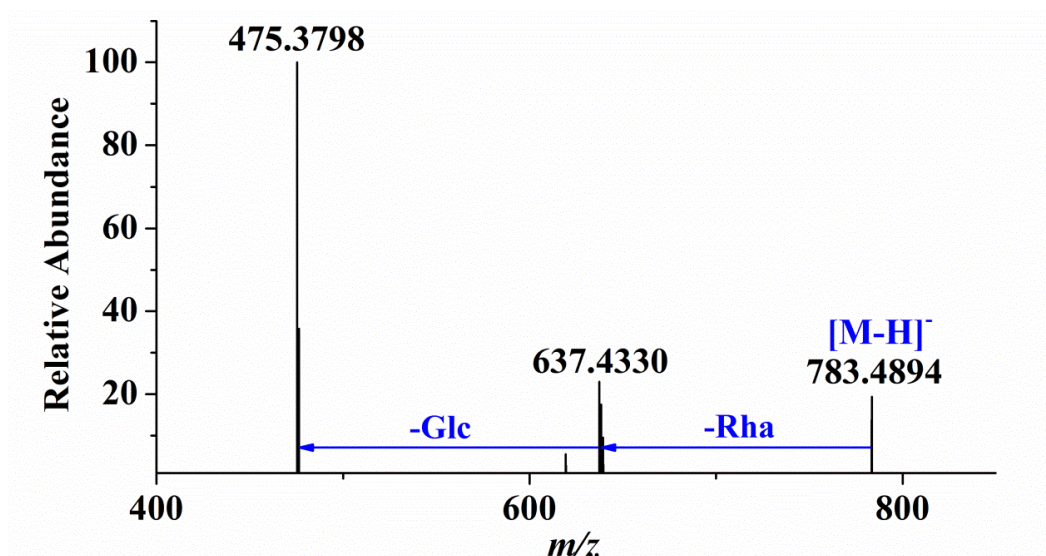

Figure S4. The MS/MS spectrum of the reference standard ginsenoside Rg2.

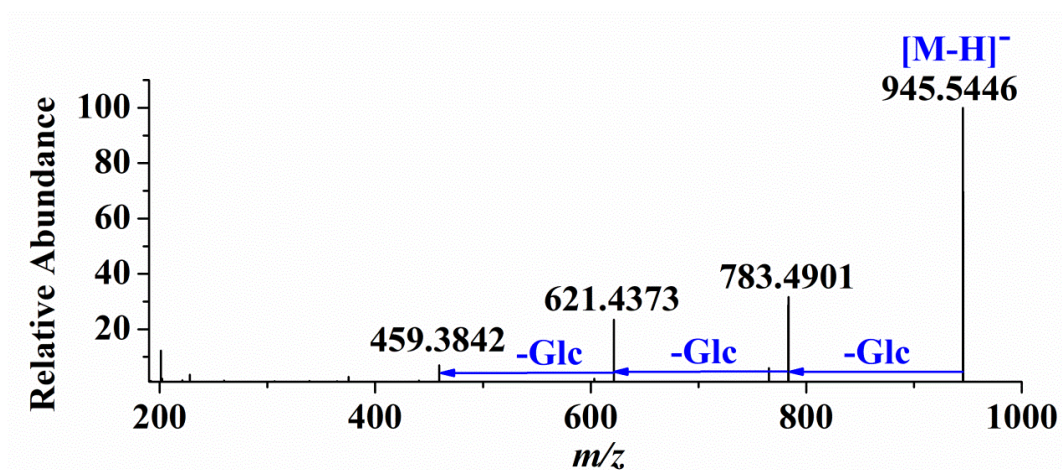

Figure S5. The MS/MS spectrum of the reference standard ginsenoside Rd.

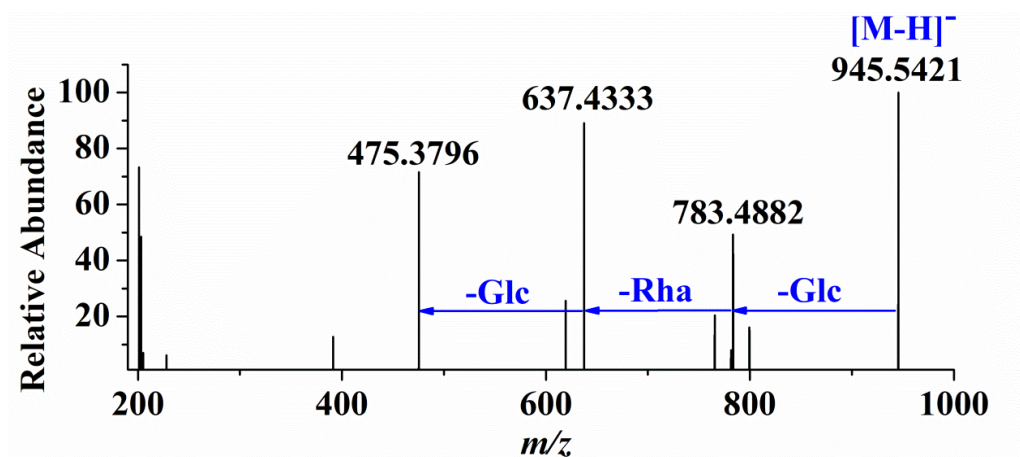

Figure S6. The MS/MS spectrum of the reference standard ginsenoside Re.



**Table S2.** The identified ginsenosides from the extract solution of RRPg.

| No. | $t_R$<br>(min) | Molecular<br>formula                            | Measured<br>value (m/z) | Diff<br>(ppm) | Product ions                                                                                                                                                                                                                                                                                                                                      | Compound name                                      |
|-----|----------------|-------------------------------------------------|-------------------------|---------------|---------------------------------------------------------------------------------------------------------------------------------------------------------------------------------------------------------------------------------------------------------------------------------------------------------------------------------------------------|----------------------------------------------------|
| R1  | 6.99           | C <sub>48</sub> H <sub>84</sub> O <sub>20</sub> | 979.5486                | 0.82          | 817.4918[M-H-Glc] <sup>-</sup> ,<br>799.4863[M-H-Glc-H <sub>2</sub> O] <sup>-</sup> ,<br>671.4409[M-H-Glc-Rha] <sup>-</sup> ,<br>653.4276[M-H-Glc-Rha-H <sub>2</sub> O] <sup>-</sup> ,<br>635.4174[M-H-Glc-Rha-2H <sub>2</sub> O] <sup>-</sup> ,<br>509.3840[M-H-2Glc-Rha] <sup>-</sup> ,<br>491.3755[M-H-2Glc-Rha-H <sub>2</sub> O] <sup>-</sup> | Oxidated+hydrated<br>protopanaxatriol+2<br>Glc+Rha |
| R2  | 7.20           | C <sub>48</sub> H <sub>84</sub> O <sub>20</sub> | 1025.5530 <sup>b</sup>  | -0.20         | 817.4996[M-H-Glc] <sup>-</sup> ,<br>799.4866[M-H-Glc-H <sub>2</sub> O] <sup>-</sup> ,<br>671.4429[M-H-Glc-Rha] <sup>-</sup> ,<br>653.4279[M-H-Glc-Rha-H <sub>2</sub> O] <sup>-</sup> ,<br>635.4166[M-H-Glc-Rha-2H <sub>2</sub> O] <sup>-</sup> ,<br>509.3836[M-H-2Glc-Rha] <sup>-</sup> ,<br>491.3745[M-H-2Glc-Rha-H <sub>2</sub> O] <sup>-</sup> | Oxidated+hydrated<br>protopanaxatriol+2<br>Glc+Rha |
| R3  | 8.04           | C <sub>42</sub> H <sub>72</sub> O <sub>15</sub> | 861.4847 <sup>b</sup>   | -0.12         | 653.4335[M-H-2Glc] <sup>-</sup> ,<br>491.3773[M-H-2Glc] <sup>-</sup>                                                                                                                                                                                                                                                                              | Ginsenoside Re<br>isomer/Ginsengjilinol<br>isomer  |
| R4  | 8.12           | C <sub>48</sub> H <sub>82</sub> O <sub>20</sub> | 1023.5377 <sup>b</sup>  | 0.10          | 977.5248[M-H] <sup>-</sup> ,<br>815.4767[M-H-Glc] <sup>-</sup> ,<br>797.4711[M-H-Glc-H <sub>2</sub> O] <sup>-</sup> ,<br>653.4276[M-H-2Glc] <sup>-</sup> ,<br>635.4193[M-H-2Glc-H <sub>2</sub> O] <sup>-</sup> ,<br>491.3737[M-H-3Glc] <sup>-</sup>                                                                                               | Oxidated-protopan<br>axatriol+3Glc                 |
| R5  | 8.24           | C <sub>42</sub> H <sub>74</sub> O <sub>15</sub> | 863.5000 <sup>b</sup>   | -0.46         | 655.4158[M-H-Glc] <sup>-</sup> ,<br>493.3926[M-H-2Glc] <sup>-</sup>                                                                                                                                                                                                                                                                               | Double bond<br>hydrated-protopana                  |

|     |      |                                                 |                       |      |                                                                                                                                                                                       |                                                               |
|-----|------|-------------------------------------------------|-----------------------|------|---------------------------------------------------------------------------------------------------------------------------------------------------------------------------------------|---------------------------------------------------------------|
|     |      |                                                 |                       |      |                                                                                                                                                                                       | xatriol+2Glc                                                  |
| R6  | 8.28 | C <sub>48</sub> H <sub>82</sub> O <sub>19</sub> | 961.5383              | 1.14 | 799.4803[M-H-Glc] <sup>-</sup> ,<br>781.4755[M-H-Glc-H <sub>2</sub> O] <sup>-</sup> ,<br>635.4137[M-H-Glc-H <sub>2</sub> O-Rha] <sup>-</sup> ,<br>491.3736[M-H-2Glc-Rha] <sup>-</sup> | Oxidated-protopan<br>axatriol+2Glc+Rha                        |
| R7  | 8.44 | C <sub>48</sub> H <sub>82</sub> O <sub>19</sub> | 961.5387              | 1.56 | 799.4922[M-H-Glc] <sup>-</sup> ,<br>781.4753[M-H-Glc-H <sub>2</sub> O] <sup>-</sup> ,<br>635.4191[M-H-Glc-H <sub>2</sub> O-Rha] <sup>-</sup> ,<br>491.3735[M-H-2Glc-Rha] <sup>-</sup> | Oxidated-protopan<br>axatriol+2Glc+Rha                        |
| R8  | 8.47 | C <sub>42</sub> H <sub>72</sub> O <sub>15</sub> | 861.4852 <sup>b</sup> | 0.46 | 653.4305[M-H-2Glc] <sup>-</sup> ,<br>491.3784[M-H-2Glc] <sup>-</sup>                                                                                                                  | Ginsenoside Re <sub>5</sub><br>isomer/Ginsenjilinol<br>isomer |
| R9  | 8.71 | C <sub>42</sub> H <sub>72</sub> O <sub>15</sub> | 861.4856 <sup>b</sup> | 0.93 | 653.4321[M-H-2Glc] <sup>-</sup> ,<br>491.3744[M-H-2Glc] <sup>-</sup>                                                                                                                  | Ginsenoside Re <sub>5</sub><br>isomer/Ginsenjilinol<br>isomer |
| R10 | 8.80 | C <sub>42</sub> H <sub>70</sub> O <sub>15</sub> | 859.4696 <sup>b</sup> | 0.58 | 651.4141[M-H-Glc] <sup>-</sup> ,<br>489.3577[M-H-2Glc] <sup>-</sup>                                                                                                                   | Methyl<br>etherified-protopan<br>axatriol+2Glc                |
| R11 | 9.29 | C <sub>42</sub> H <sub>72</sub> O <sub>15</sub> | 861.4854 <sup>b</sup> | 0.70 | 653.4230[M-H-2Glc] <sup>-</sup> ,<br>491.3721[M-H-2Glc] <sup>-</sup>                                                                                                                  | Ginsenoside Re <sub>5</sub><br>isomer/Ginsenjilinol<br>isomer |
| R12 | 9.34 | C <sub>42</sub> H <sub>72</sub> O <sub>16</sub> | 877.4809 <sup>b</sup> | 1.37 | 831.4691[M-H] <sup>-</sup> ,<br>669.4186[M-H-Glc] <sup>-</sup> ,<br>507.3710[M-H-2Glc] <sup>-</sup>                                                                                   | Dioxidated<br>-protopanaxatriol+2<br>Glc                      |
| R13 | 9.38 | C <sub>42</sub> H <sub>70</sub> O <sub>15</sub> | 859.4695 <sup>b</sup> | 0.47 | 813.4571[M-H] <sup>-</sup> ,<br>651.4139[M-H-Glc] <sup>-</sup> ,<br>489.3561[M-H-2Glc] <sup>-</sup>                                                                                   | Methyl<br>etherified-protopan<br>axatriol+2Glc                |
| R14 | 9.39 | C <sub>48</sub> H <sub>82</sub> O <sub>19</sub> | 961.5380              | 0.83 | 781.4695[M-H-Glc-H <sub>2</sub> O] <sup>-</sup> ,<br>635.4142[M-H-Glc-H <sub>2</sub> O-Rha] <sup>-</sup> ,<br>491.3722[M-H-2Glc-Rha] <sup>-</sup>                                     | Oxidated-protopan<br>axatriol+2Glc+Rha                        |

|     |       |                                                 |                       |       |                                                                                                                                                             |                                                               |
|-----|-------|-------------------------------------------------|-----------------------|-------|-------------------------------------------------------------------------------------------------------------------------------------------------------------|---------------------------------------------------------------|
| R15 | 9.44  | C <sub>42</sub> H <sub>72</sub> O <sub>15</sub> | 815.4800              | 0.86  | 653.4324[M-H-2Glc] <sup>-</sup> ,<br>491.3729[M-H-2Glc] <sup>-</sup>                                                                                        | Ginsenoside Re <sub>5</sub><br>isomer/Ginsenjilinol<br>isomer |
| R16 | 9.70  | C <sub>42</sub> H <sub>74</sub> O <sub>15</sub> | 863.5018 <sup>b</sup> | 1.62  | 817.4910[M-H] <sup>-</sup> ,<br>671.4387[M-H-Rha] <sup>-</sup> ,<br>653.4279[M-H-Rha-H <sub>2</sub> O] <sup>-</sup> ,<br>509.3851[M-H-Rha-Glc] <sup>-</sup> | Oxidated+hydrated<br>protopanaxatriol+Gl<br>c+Rha             |
| R17 | 9.75  | C <sub>42</sub> H <sub>72</sub> O <sub>15</sub> | 815.4793              | 0.00  | 653.4119[M-H-2Glc] <sup>-</sup> ,<br>491.3717[M-H-2Glc] <sup>-</sup>                                                                                        | Ginsenoside Re <sub>5</sub><br>isomer/Ginsenjilinol<br>isomer |
| R18 | 10.07 | C <sub>42</sub> H <sub>72</sub> O <sub>15</sub> | 815.4795              | 0.25  | 653.4203[M-H-2Glc] <sup>-</sup> ,<br>491.3749[M-H-2Glc] <sup>-</sup>                                                                                        | Ginsenoside Re <sub>5</sub><br>isomer/Ginsenjilinol<br>isomer |
| R19 | 10.11 | C <sub>53</sub> H <sub>90</sub> O <sub>23</sub> | 1093.5796             | 0.09  | 961.5309[M-H-Ara] <sup>-</sup> ,<br>799.4929[M-H-Ara-Glc] <sup>-</sup> ,<br>637.4329[M-H-Ara-2Glc] <sup>-</sup> ,<br>475.3816[M-H-Ara-3Glc] <sup>-</sup>    | Floralginsenoside<br>P/isomer                                 |
| R20 | 10.20 | C <sub>42</sub> H <sub>72</sub> O <sub>15</sub> | 815.4794              | 0.12  | 653.4243[M-H-2lc] <sup>-</sup> ,<br>491.3737[M-H-2Glc] <sup>-</sup>                                                                                         | Ginsenoside Re <sub>5</sub> <sup>a</sup>                      |
| R21 | 10.27 | C <sub>47</sub> H <sub>80</sub> O <sub>18</sub> | 931.5269              | 0.32  | 491.3748[M-H-Ara/Xyl-Rha-Glc] <sup>-</sup>                                                                                                                  | Oxidated-protopan<br>axatriol+Ara/Xyl+R<br>ha+Glc             |
| R22 | 10.31 | C <sub>54</sub> H <sub>92</sub> O <sub>23</sub> | 1107.5944             | -0.63 | 945.5400[M-H-Glc] <sup>-</sup> ,<br>783.4881[M-H-2Glc] <sup>-</sup> ,<br>637.4347[M-H-2Glc-Rha] <sup>-</sup> ,<br>475.3798[M-H-3Glc-Rha] <sup>-</sup>       | Protopanaxatriol+3<br>Glc+Rha                                 |
| R23 | 10.34 | C <sub>47</sub> H <sub>80</sub> O <sub>18</sub> | 931.5268              | 0.21  | 653.4296[M-H-Ara/Xyl-Rha] <sup>-</sup> ,<br>491.3808[M-H-Ara/Xyl-Rha-Glc] <sup>-</sup>                                                                      | Oxidated-protopan<br>axatriol+Ara/Xyl+R<br>ha+Glc             |
| R24 | 10.41 | C <sub>42</sub> H <sub>72</sub> O <sub>15</sub> | 815.4804              | 1.35  | 653.4332[M-H-2Glc] <sup>-</sup> ,<br>491.3715[M-H-2Glc] <sup>-</sup>                                                                                        | Ginsenoside Re <sub>5</sub><br>isomer/Ginsenjilinol<br>isomer |
| R25 | 10.42 | C <sub>53</sub> H <sub>90</sub> O <sub>23</sub> | 1093.5800             | 0.46  | 799.4976[M-H-Ara-Glc] <sup>-</sup> ,<br>637.4310[M-H-Ara-2Glc] <sup>-</sup>                                                                                 | Floralginsenoside                                             |

|     |       |                                                 |                        |       |                                                                                                                                                                                                                                                                           |                                                                    |
|-----|-------|-------------------------------------------------|------------------------|-------|---------------------------------------------------------------------------------------------------------------------------------------------------------------------------------------------------------------------------------------------------------------------------|--------------------------------------------------------------------|
|     |       |                                                 |                        |       | 475.3813[M-H-Ara-3Glc] <sup>-</sup>                                                                                                                                                                                                                                       | P/isomer                                                           |
| R26 | 10.50 | C <sub>58</sub> H <sub>98</sub> O <sub>26</sub> | 1209.6240              | -2.30 | 1077.5824[M-H-Xyl/Ara] <sup>-</sup> ,<br>945.5352[M-H-Xyl-Ara] <sup>-</sup> ,<br>783.4899[M-H-Xyl-Ara-Glc] <sup>-</sup> ,<br>637.4327[M-H-Xyl-Ara-Glc-Rha] <sup>-</sup> ,<br>475.3799[M-H-Xyl-Ara-2Glc-Rha] <sup>-</sup>                                                  | Protopanaxatriol+2<br>Glc+Rha+Xyl+Ara                              |
| R27 | 10.53 | C <sub>54</sub> H <sub>92</sub> O <sub>23</sub> | 1107.5938              | -1.17 | 945.5454[M-H-Glc] <sup>-</sup> ,<br>783.4970[M-H-2Glc] <sup>-</sup> ,<br>637.4352[M-H-2Glc-Rha] <sup>-</sup> ,<br>475.3832[M-H-3Glc-Rha] <sup>-</sup>                                                                                                                     | Protopanaxatriol+3<br>Glc+Rha                                      |
| R28 | 10.57 | C <sub>48</sub> H <sub>82</sub> O <sub>19</sub> | 961.5372               | 0.00  | 799.4865[M-H-Glc] <sup>-</sup> ,<br>637.4351[M-H-2Glc] <sup>-</sup> ,<br>475.3785[M-H-3Glc] <sup>-</sup>                                                                                                                                                                  | Ginsenoside Re <sub>3</sub> <sup>a</sup>                           |
| R29 | 10.63 | C <sub>48</sub> H <sub>82</sub> O <sub>20</sub> | 1023.5371 <sup>b</sup> | -0.49 | 815.4866[M-H-Glc] <sup>-</sup> ,<br>797.4678[M-H-Glc-H <sub>2</sub> O] <sup>-</sup> ,<br>653.4309[M-H-2Glc] <sup>-</sup> ,<br>635.4155[M-H-2Glc-H <sub>2</sub> O] <sup>-</sup> ,<br>491.3808[M-H-3Glc] <sup>-</sup> ,<br>473.3588[M-H-3Glc-H <sub>2</sub> O] <sup>-</sup> | Oxidated-protopan<br>axatriol+3Glc                                 |
| R30 | 10.84 | C <sub>45</sub> H <sub>74</sub> O <sub>18</sub> | 901.4805               | 0.89  | 815.4798[M-H-Malonyl] <sup>-</sup> ,<br>653.4215[M-H-Malonyl-Glc] <sup>-</sup> ,<br>491.3746[M-H-Malonyl-2Glc] <sup>-</sup>                                                                                                                                               | Oxidated-protopan<br>axatriol+Glc+Malon<br>yl Glc                  |
| R31 | 10.86 | C <sub>42</sub> H <sub>70</sub> O <sub>15</sub> | 859.4698 <sup>b</sup>  | 0.81  | 813.4571[M-H] <sup>-</sup> ,<br>651.4103[M-H-Glc] <sup>-</sup> ,<br>489.3588[M-H-2Glc] <sup>-</sup>                                                                                                                                                                       | Methyl<br>etherified-protopan<br>axatriol+2Glc                     |
| R32 | 10.88 | C <sub>51</sub> H <sub>84</sub> O <sub>22</sub> | 1047.5388              | 1.15  | 961.5326[M-H-Malonyl] <sup>-</sup> ,<br>799.4797[M-H-Malonyl-Glc] <sup>-</sup> ,<br>637.4406[M-H-Malonyl-2Glc] <sup>-</sup> ,<br>475.3806[M-H-Malonyl-3Glc] <sup>-</sup>                                                                                                  | Malonyl-ginsenosid<br>e<br>Malonyl-ginsenosid<br>e Re <sub>3</sub> |

|     |       |                                                 |                        |       |                                                                                                                                                                                                                        |                                                       |
|-----|-------|-------------------------------------------------|------------------------|-------|------------------------------------------------------------------------------------------------------------------------------------------------------------------------------------------------------------------------|-------------------------------------------------------|
| R33 | 10.91 | C <sub>42</sub> H <sub>72</sub> O <sub>14</sub> | 799.4855               | 1.38  | 653.4247[M-H-Rha] <sup>-</sup> ,<br>491.3707[M-H-Rha-Glc] <sup>-</sup>                                                                                                                                                 | Oxidated-protopanaxatriol+Glc+Rha                     |
| R34 | 10.96 | C <sub>47</sub> H <sub>80</sub> O <sub>18</sub> | 931.5270               | 0.43  | 799.4870[M-H-Ara(f)] <sup>-</sup> ,<br>637.4311[M-H-Ara(f)-Glc] <sup>-</sup> ,<br>475.3805[M-H-Ara(f)-2Glc] <sup>-</sup>                                                                                               | Ginsenoside Re <sub>4</sub> <sup>a</sup>              |
| R35 | 11.04 | C <sub>53</sub> H <sub>90</sub> O <sub>22</sub> | 1077.5857              | 1.11  | 945.5451[M-H-Ara] <sup>-</sup> ,<br>799.4750[M-H-Ara-Rha] <sup>-</sup> ,<br>637.4280[M-H-Ara-Rha-Glc] <sup>-</sup> ,<br>475.3815[M-H-Ara-Rha-2Glc] <sup>-</sup>                                                        | Floralginsenoside M/Floralginsenoside N               |
| R36 | 11.13 | C <sub>42</sub> H <sub>74</sub> O <sub>14</sub> | 847.5063 <sup>b</sup>  | 0.94  | 801.5004[M-H] <sup>-</sup> ,<br>655.4425[M-H-Rha] <sup>-</sup> ,<br>493.3891[M-H-Rha-Glc] <sup>-</sup>                                                                                                                 | Ginsenoside Rf <sub>2</sub>                           |
| R37 | 11.17 | C <sub>42</sub> H <sub>72</sub> O <sub>14</sub> | 799.4828               | -2.00 | 653.4296[M-H-Rha] <sup>-</sup> ,<br>635.4138[M-H-Rha-H <sub>2</sub> O] <sup>-</sup> ,<br>491.3751[M-H-Rha-Glc] <sup>-</sup>                                                                                            | Oxidated-protopanaxatriol+Glc+Rha                     |
| R38 | 11.17 | C <sub>42</sub> H <sub>74</sub> O <sub>15</sub> | 863.4995 <sup>b</sup>  | -1.04 | 817.4957[M-H] <sup>-</sup> ,<br>655.4329[M-H-Glc] <sup>-</sup> ,<br>493.3911[M-H-2Glc] <sup>-</sup>                                                                                                                    | Double bond hydrated-protopanaxatriol+2Glc            |
| R39 | 11.17 | C <sub>59</sub> H <sub>98</sub> O <sub>28</sub> | 1299.6212 <sup>b</sup> | -0.69 | 1121.5668[M-H-Xyl/Ara] <sup>-</sup> ,<br>959.5083[M-H-Xyl/Ara-Glc] <sup>-</sup> ,<br>797.4700[M-H-Xyl/Ara-2Glc] <sup>-</sup> ,<br>635.4093[M-H-Xyl/Ara-3Glc] <sup>-</sup> ,<br>473.3625[M-H-Xyl/Ara-4Glc] <sup>-</sup> | Dehydrogenated-protopanaxatriol+4Glc+Xyl/Ara          |
| R40 | 11.18 | C <sub>48</sub> H <sub>82</sub> O <sub>19</sub> | 961.5369               | -0.31 | 799.4857[M-H-Glc] <sup>-</sup> ,<br>637.4313[M-H-2Glc] <sup>-</sup> ,<br>475.3779[M-H-3Glc] <sup>-</sup>                                                                                                               | 20-Gluco-ginsenoside Rf <sup>a</sup>                  |
| R41 | 11.22 | C <sub>42</sub> H <sub>72</sub> O <sub>15</sub> | 815.4801               | 0.98  | 653.4325[M-H-2Glc] <sup>-</sup> ,<br>491.3709[M-H-2Glc] <sup>-</sup>                                                                                                                                                   | Ginsenoside Re <sub>5</sub> isomer/Ginsenjilol isomer |
| R42 | 11.22 | C <sub>50</sub> H <sub>84</sub> O <sub>20</sub> | 1003.5487              | 0.90  | 961.5366[M-H-Ac] <sup>-</sup> ,                                                                                                                                                                                        | Acetyl ginsenoside Re <sub>1</sub> / Acetyl           |

|     |       |                                                 |                       |       |                                                                                                                                                                                                                      |                                                                                                                                                           |
|-----|-------|-------------------------------------------------|-----------------------|-------|----------------------------------------------------------------------------------------------------------------------------------------------------------------------------------------------------------------------|-----------------------------------------------------------------------------------------------------------------------------------------------------------|
|     |       |                                                 |                       |       | 799.4789[M-H-Ac-Glc] <sup>-</sup> ,<br>637.4323[M-H-Ac-2Glc] <sup>-</sup> ,<br>475.3793[M-H-Ac-3Glc] <sup>-</sup>                                                                                                    | ginsenoside Re <sub>2</sub> /<br>Acetyl ginsenoside<br>Re <sub>3</sub> / Acetyl<br>ginsenoside<br>20-Gluco-ginsenoside Rf/<br>Acetyl<br>notoginsenoside N |
| R43 | 11.25 | C <sub>47</sub> H <sub>80</sub> O <sub>18</sub> | 931.5271              | 0.54  | 637.4346[M-H-Xyl-Glc] <sup>-</sup> ,<br>475.3808[M-H-Xyl-2Glc] <sup>-</sup>                                                                                                                                          | Notoginsenoside R <sub>1</sub><br>isomer                                                                                                                  |
| R44 | 11.26 | C <sub>58</sub> H <sub>98</sub> O <sub>26</sub> | 1209.6295             | 2.23  | 1077.5820[M-H-Xyl] <sup>-</sup> ,<br>945.5355[M-H-Xyl-Ara] <sup>-</sup> ,<br>783.5020[M-H-Xyl-Ara-Glc] <sup>-</sup> ,<br>637.4327[M-H-Xyl-Ara-Glc-Rha] <sup>-</sup> ,<br>475.3804[M-H-Xyl-Ara-2Glc-Rha] <sup>-</sup> | Protopanaxatriol+2<br>Glc+Rha+Xyl+Ara                                                                                                                     |
| R45 | 11.31 | C <sub>54</sub> H <sub>92</sub> O <sub>23</sub> | 1107.5973             | 1.99  | 945.5414[M-H-Glc] <sup>-</sup> ,<br>783.4889[M-H-2Glc] <sup>-</sup> ,<br>637.4300[M-H-2Glc-Rha] <sup>-</sup> ,<br>475.3807[M-H-3Glc-Rha] <sup>-</sup>                                                                | Protopanaxatriol+3<br>Glc+Rha                                                                                                                             |
| R46 | 11.32 | C <sub>48</sub> H <sub>82</sub> O <sub>19</sub> | 961.5381              | 0.94  | 799.4863[M-H-Glc] <sup>-</sup> ,<br>637.4342[M-H-2Glc] <sup>-</sup> ,<br>475.3794[M-H-3Glc] <sup>-</sup>                                                                                                             | Ginsenoside Re <sub>1</sub> <sup>a</sup>                                                                                                                  |
| R47 | 11.35 | C <sub>42</sub> H <sub>74</sub> O <sub>14</sub> | 847.5060 <sup>b</sup> | 0.59  | 801.4948[M-H] <sup>-</sup> ,<br>655.4340[M-H-Rha] <sup>-</sup> ,<br>493.3745[M-H-Rha-Glc] <sup>-</sup>                                                                                                               | Ginsenoside Rf <sub>2</sub><br>isomer                                                                                                                     |
| R48 | 11.39 | C <sub>53</sub> H <sub>90</sub> O <sub>22</sub> | 1077.5864             | 1.76  | 945.5461[M-H-Ara] <sup>-</sup> ,<br>799.4789[M-H-Ara-Rha] <sup>-</sup> ,<br>637.4276[M-H-Ara-Rha-Glc] <sup>-</sup> ,<br>475.3737[M-H-Ara-Rha-2Glc] <sup>-</sup>                                                      | Floralginsenoside<br>M/Floralginsenoside N                                                                                                                |
| R49 | 11.43 | C <sub>54</sub> H <sub>94</sub> O <sub>25</sub> | 1141.5999             | -0.61 | 979.5508[M-H-Glc] <sup>-</sup> ,<br>817.4980[M-H-2Glc] <sup>-</sup> ,<br>799.4844[M-H-2Glc-H <sub>2</sub> O] <sup>-</sup> ,<br>655.4418[M-H-3Glc] <sup>-</sup>                                                       | Double bond<br>hydrated-protopanaxatriol+4Glc                                                                                                             |

|     |       |                                                 |                        |       |                                                                                                                                                                                                                                                                                                     |                                                                                                        |
|-----|-------|-------------------------------------------------|------------------------|-------|-----------------------------------------------------------------------------------------------------------------------------------------------------------------------------------------------------------------------------------------------------------------------------------------------------|--------------------------------------------------------------------------------------------------------|
|     |       |                                                 |                        |       | 637.4325[M-H-3Glc-H <sub>2</sub> O] <sup>-</sup> ,<br>493.3886[M-H-4Glc] <sup>-</sup>                                                                                                                                                                                                               |                                                                                                        |
| R50 | 11.45 | C <sub>47</sub> H <sub>80</sub> O <sub>18</sub> | 931.5268               | 0.21  | 799.4841[M-H-Xyl] <sup>-</sup> ,<br>637.4324[M-H-Xyl-Glc] <sup>-</sup> ,<br>475.3802[M-H-Xyl-2Glc] <sup>-</sup>                                                                                                                                                                                     | Notoginsenoside R <sub>1</sub><br><sup>a</sup>                                                         |
| R51 | 11.46 | C <sub>42</sub> H <sub>70</sub> O <sub>15</sub> | 813.4651               | 1.84  | 651.4540[M-H-Glc] <sup>-</sup> ,<br>489.3578[M-H-2Glc] <sup>-</sup>                                                                                                                                                                                                                                 | Methyl<br>etherified-protopan<br>axatriol+2Glc                                                         |
| R52 | 11.47 | C <sub>54</sub> H <sub>92</sub> O <sub>23</sub> | 1107.5931              | -1.81 | 945.5482[M-H-Glc] <sup>-</sup> ,<br>783.4904[M-H-2Glc] <sup>-</sup> ,<br>637.4229[M-H-2Glc-Rha] <sup>-</sup> ,<br>475.3813[M-H-3Glc-Rha] <sup>-</sup>                                                                                                                                               | Protopanaxatriol+3<br>Glc+Rha                                                                          |
| R53 | 11.55 | C <sub>36</sub> H <sub>62</sub> O <sub>10</sub> | 699.4317 <sup>b</sup>  | -0.43 | 491.3727[M-H-Glc] <sup>-</sup>                                                                                                                                                                                                                                                                      | Oxidated-protopan<br>axatriol+Glc                                                                      |
| R54 | 11.60 | C <sub>48</sub> H <sub>82</sub> O <sub>19</sub> | 961.5388               | 1.66  | 799.4866[M-H-Glc] <sup>-</sup> ,<br>637.4362[M-H-2Glc] <sup>-</sup> ,<br>475.3822[M-H-3Glc] <sup>-</sup>                                                                                                                                                                                            | Ginsenoside Re <sub>2</sub> <sup>a</sup>                                                               |
| R55 | 11.60 | C <sub>53</sub> H <sub>92</sub> O <sub>24</sub> | 1111.5915              | 1.35  | 979.5418[M-H-Xyl/Ara] <sup>-</sup> ,<br>817.4936[M-H-Xyl/Ara-Glc] <sup>-</sup> ,<br>799.4843[M-H-Xyl/Ara-Glc-H <sub>2</sub> O] <sup>-</sup> ,<br>655.4416[M-H-Xyl/Ara-2Glc] <sup>-</sup> ,<br>637.4308[M-H-Xyl/Ara-2Glc-H <sub>2</sub> O] <sup>-</sup> ,<br>493.3888[M-H-Xyl/Ara-3Glc] <sup>-</sup> | Double bond<br>hydrated-protopana<br>xatriol+3Glc+Xyl/Ar<br><sup>a</sup>                               |
| R56 | 11.62 | C <sub>51</sub> H <sub>84</sub> O <sub>19</sub> | 1045.5572 <sup>b</sup> | -1.05 | 931.5161[M-H-(E)-but-2-enoyl] <sup>-</sup> ,<br>799.4856[M-H-(E)-but-2-enoyl-Ara(f)/<br>Xyl] <sup>-</sup> ,<br>637.4326[M-H-(E)-but-2-enoyl-Ara(f)/<br>Xyl-Glc] <sup>-</sup> ,<br>475.3801[M-H-(E)-but-2-enoyl-Ara(f)/<br>Xyl-2Glc] <sup>-</sup>                                                    | (E)-But-2-enoyl-gins<br>enoside<br>Re <sub>4</sub> /(E)-But-2-enoyl-<br>notoginsenoside R <sub>1</sub> |
| R57 | 11.71 | C <sub>42</sub> H <sub>72</sub> O <sub>15</sub> | 815.4794               | 0.12  | 653.4219[M-H-2Glc] <sup>-</sup> ,                                                                                                                                                                                                                                                                   | Ginsenoside Re <sub>5</sub><br>isomer/Ginsenjilanol                                                    |

|     |       |                                                 |                       |       |                                                                                                                                                                          |                                                                                                                                                                                                             |
|-----|-------|-------------------------------------------------|-----------------------|-------|--------------------------------------------------------------------------------------------------------------------------------------------------------------------------|-------------------------------------------------------------------------------------------------------------------------------------------------------------------------------------------------------------|
|     |       |                                                 |                       |       | 491.3742[M-H-2Glc] <sup>-</sup>                                                                                                                                          | isomer                                                                                                                                                                                                      |
| R58 | 11.73 | C <sub>53</sub> H <sub>90</sub> O <sub>22</sub> | 1077.5830             | -1.39 | 945.5437[M-H-Ara] <sup>-</sup> ,<br>799.4862[M-H-Ara-Rha] <sup>-</sup> ,<br>637.4237[M-H-Ara-Rha-Glc] <sup>-</sup> ,<br>475.3768[M-H-Ara-Rha-2Glc] <sup>-</sup>          | Floralginsenoside<br>M<br>isomer/Floralginsen<br>oside N isomer                                                                                                                                             |
| R59 | 11.81 | C <sub>47</sub> H <sub>80</sub> O <sub>18</sub> | 931.5274              | 0.86  | 637.4318[M-H-Xyl-Glc] <sup>-</sup> ,<br>475.3796[M-H-Xyl-2Glc] <sup>-</sup>                                                                                              | Notoginsenoside R <sub>1</sub><br>isomer                                                                                                                                                                    |
| R60 | 11.89 | C <sub>54</sub> H <sub>92</sub> O <sub>23</sub> | 1107.5970             | 1.72  | 945.5467[M-H-Glc] <sup>-</sup> ,<br>783.4889[M-H-2Glc] <sup>-</sup> ,<br>637.430[M-H-2Glc-Rha] <sup>-</sup> ,<br>475.3810[M-H-3Glc-Rha] <sup>-</sup>                     | Protopanaxatriol+3<br>Glc+Rha                                                                                                                                                                               |
| R61 | 11.89 | C <sub>51</sub> H <sub>84</sub> O <sub>22</sub> | 1047.5377             | 0.10  | 961.5388[M-H-Malonyl] <sup>-</sup> ,<br>799.4798[M-H-Malonyl-Glc] <sup>-</sup> ,<br>637.4352[M-H-Malonyl-2Glc] <sup>-</sup> ,<br>475.3803[M-H-Malonyl-3Glc] <sup>-</sup> | Malonyl-20-Gluco-g<br>insenoside Rf                                                                                                                                                                         |
| R62 | 11.90 | C <sub>42</sub> H <sub>70</sub> O <sub>15</sub> | 859.4703 <sup>b</sup> | 1.40  | 489.3678[M-H-2Glc] <sup>-</sup>                                                                                                                                          | Methyl<br>etherified-protopan<br>axatriol+2Glc                                                                                                                                                              |
| R63 | 11.94 | C <sub>42</sub> H <sub>74</sub> O <sub>15</sub> | 863.4990 <sup>b</sup> | -1.62 | 817.4906[M-H] <sup>-</sup> ,<br>493.3920[M-H-2Glc] <sup>-</sup>                                                                                                          | Double bond<br>hydrated-protopana<br>xatriol+2Glc                                                                                                                                                           |
| R64 | 11.98 | C <sub>50</sub> H <sub>84</sub> O <sub>20</sub> | 1003.5478             | 0.00  | 961.5382[M-H-Ac] <sup>-</sup> ,<br>799.4834[M-H-Ac-Glc] <sup>-</sup> ,<br>637.4323[M-H-Ac-2Glc] <sup>-</sup> ,<br>475.3794[M-H-Ac-3Glc] <sup>-</sup>                     | Acetyl ginsenoside<br>Re <sub>1</sub> / Acetyl<br>ginsenoside Re <sub>2</sub> /<br>Acetyl ginsenoside<br>Re <sub>3</sub> / Acetyl<br>ginsenoside<br>20-Gluco-ginsensi<br>de Rf/ Acetyl<br>notoginsenoside N |
| R65 | 11.99 | C <sub>54</sub> H <sub>90</sub> O <sub>25</sub> | 1137.5707             | 1.23  | 961.5355[M-H-Glu A] <sup>-</sup> ,<br>799.4926[M-H-Glu A-Glc] <sup>-</sup> ,<br>637.4364[M-H-Glu A-2Glc] <sup>-</sup>                                                    | Protopanaxatriol+<br>Glu A+3Glc                                                                                                                                                                             |



|     |       |                                                 |           |       |                                                                                                                                                                                                                                                                                                                                                                                                                                                                                                                                                                         |                                                                         |
|-----|-------|-------------------------------------------------|-----------|-------|-------------------------------------------------------------------------------------------------------------------------------------------------------------------------------------------------------------------------------------------------------------------------------------------------------------------------------------------------------------------------------------------------------------------------------------------------------------------------------------------------------------------------------------------------------------------------|-------------------------------------------------------------------------|
|     |       |                                                 |           |       | 475.3810[M-H-Glu A-3Glc] <sup>-</sup>                                                                                                                                                                                                                                                                                                                                                                                                                                                                                                                                   |                                                                         |
| R66 | 12.01 | C <sub>54</sub> H <sub>92</sub> O <sub>24</sub> | 1123.5904 | 0.36  | 961.5287[M-H-Glc] <sup>-</sup> ,<br>799.4835[M-H-2Glc] <sup>-</sup> ,<br>637.4333[M-H-3Glc] <sup>-</sup> ,<br>475.3820[M-H-4Glc] <sup>-</sup>                                                                                                                                                                                                                                                                                                                                                                                                                           | Koryoginsenoside<br>R <sub>2</sub>                                      |
| R67 | 12.05 | C <sub>50</sub> H <sub>90</sub> O <sub>27</sub> | 1121.5595 | 0.36  | 959.5172[M-H-Glc] <sup>-</sup> ,<br>797.4690[M-H-2Glc] <sup>-</sup> ,<br>635.4152[M-H-3Glc] <sup>-</sup> ,<br>473.3636[M-H-4Glc] <sup>-</sup>                                                                                                                                                                                                                                                                                                                                                                                                                           | Dehydrogenated-pr<br>otopanaxatriol+4Glc                                |
| R68 | 12.08 | C <sub>54</sub> H <sub>92</sub> O <sub>23</sub> | 1107.5946 | -0.45 | 945.5471[M-H-Glc] <sup>-</sup> ,<br>783.4981[M-H-2Glc] <sup>-</sup> ,<br>637.4362[M-H-2Glc-Rha] <sup>-</sup> ,<br>475.3792[M-H-3Glc-Rha] <sup>-</sup>                                                                                                                                                                                                                                                                                                                                                                                                                   | Protopanaxatriol+3<br>Glc+Rha                                           |
| R69 | 12.09 | C <sub>48</sub> H <sub>82</sub> O <sub>19</sub> | 961.5372  | 0.00  | 799.4891[M-H-Glc] <sup>-</sup> ,<br>637.4326[M-H-2Glc] <sup>-</sup> ,<br>475.3784[M-H-3Glc] <sup>-</sup>                                                                                                                                                                                                                                                                                                                                                                                                                                                                | Notoginsenoside N<br>isomer                                             |
| R70 | 12.12 | C <sub>42</sub> H <sub>72</sub> O <sub>15</sub> | 815.4800  | 0.86  | 653.4303[M-H-2Glc] <sup>-</sup> ,<br>491.3732[M-H-2Glc] <sup>-</sup>                                                                                                                                                                                                                                                                                                                                                                                                                                                                                                    | Ginsenjilinol <sup>a</sup>                                              |
| R71 | 12.12 | C <sub>55</sub> H <sub>94</sub> O <sub>25</sub> | 1153.6014 | 0.69  | 1111.5779[M-H-Ac] <sup>-</sup> ,<br>1093.5718[M-H-Ac-H <sub>2</sub> O] <sup>-</sup> ,<br>817.4957[M-H-Ac-Xyl/Ara-Glc] <sup>-</sup> ,<br>799.4856[M-H-Ac-Xyl/Ara-Glc-H <sub>2</sub> O] <sup>-</sup> ,<br>781.4699[M-H-Ac-Xyl/Ara-Glc-2H <sub>2</sub> O] <sup>-</sup> ,<br>655.4407[M-H-Ac-Xyl/Ara-2Glc] <sup>-</sup> ,<br>637.4338[M-H-Ac-Xyl/Ara-2Glc-H <sub>2</sub> O] <sup>-</sup> ,<br>619.4264[M-H-Ac-Xyl/Ara-2Glc-2H <sub>2</sub> O] <sup>-</sup> ,<br>493.3902[M-H-Ac-Xyl/Ara-3Glc] <sup>-</sup> ,<br>475.3781[M-H-Ac-Xyl/Ara-3Glc-H <sub>2</sub> O] <sup>-</sup> | Double bond<br>hydrated-protopana<br>xatriol+2Glc+Acetyl<br>Glc+Xyl/Ara |

|     |       |                                                 |                        |       |                                                                                                                                                                                                                                                                                                                                                                  |                                                               |
|-----|-------|-------------------------------------------------|------------------------|-------|------------------------------------------------------------------------------------------------------------------------------------------------------------------------------------------------------------------------------------------------------------------------------------------------------------------------------------------------------------------|---------------------------------------------------------------|
| R72 | 12.13 | C <sub>54</sub> H <sub>92</sub> O <sub>24</sub> | 1123.5907              | 0.62  | 961.5385[M-H-Glc] <sup>-</sup> ,<br>799.4851[M-H-2Glc] <sup>-</sup> ,<br>637.4326[M-H-3Glc] <sup>-</sup> ,<br>475.3795[M-H-4Glc] <sup>-</sup>                                                                                                                                                                                                                    | Koryoginsenoside<br>R <sub>2</sub> isomer                     |
| R73 | 12.16 | C <sub>42</sub> H <sub>72</sub> O <sub>14</sub> | 799.4850               | 0.75  | 637.4320[M-H-Glc] <sup>-</sup> ,<br>475.3784[M-H-2Glc] <sup>-</sup>                                                                                                                                                                                                                                                                                              | Ginsenoside Rg <sub>1</sub> <sup>a</sup>                      |
| R74 | 12.20 | C <sub>48</sub> H <sub>82</sub> O <sub>18</sub> | 945.5421               | -0.21 | 783.4882[M-H-Glc] <sup>-</sup> ,<br>637.4333[M-H-Glc-Rha] <sup>-</sup> ,<br>475.3796[M-H-2Glc-Rha] <sup>-</sup>                                                                                                                                                                                                                                                  | Ginsenoside Re <sup>a</sup>                                   |
| R75 | 12.23 | C <sub>48</sub> H <sub>84</sub> O <sub>20</sub> | 1025.5533 <sup>b</sup> | 0.10  | 979.5458[M-H] <sup>-</sup> ,<br>817.4959[M-H-Glc] <sup>-</sup> ,<br>799.4861[M-H-Glc-H <sub>2</sub> O] <sup>-</sup> ,<br>655.4432[M-H-2Glc] <sup>-</sup> ,<br>637.4311[M-H-2Glc-H <sub>2</sub> O] <sup>-</sup> ,<br>619.4230[M-H-2Glc-2H <sub>2</sub> O] <sup>-</sup> ,<br>493.3889[M-H-3Glc] <sup>-</sup> ,<br>475.3819[M-H-3Glc-H <sub>2</sub> O] <sup>-</sup> | Double bond<br>hydrated-protopana<br>xatriol+3Glc             |
| R76 | 12.35 | C <sub>53</sub> H <sub>92</sub> O <sub>24</sub> | 1111.5895              | -0.45 | 979.5455[M-H-Xyl/Ara] <sup>-</sup> ,<br>817.4952[M-H-Xyl/Ara-Glc] <sup>-</sup> ,<br>799.4852[M-H-Xyl/Ara-Glc-H <sub>2</sub> O] <sup>-</sup> ,<br>655.4422[M-H-Xyl/Ara-2Glc] <sup>-</sup> ,<br>637.4312[M-H-Xyl/Ara-2Glc-H <sub>2</sub> O] <sup>-</sup> ,<br>493.3893[M-H-Xyl/Ara-3Glc] <sup>-</sup>                                                              | Double bond<br>hydrated-protopana<br>xatriol+3Glc+Xyl/Ar<br>a |
| R77 | 12.36 | C <sub>48</sub> H <sub>84</sub> O <sub>20</sub> | 1025.5522 <sup>b</sup> | -0.98 | 979.5372[M-H] <sup>-</sup> ,<br>817.4875[M-H-Glc] <sup>-</sup> ,<br>799.4833[M-H-Glc-H <sub>2</sub> O] <sup>-</sup> ,<br>655.4424[M-H-2Glc] <sup>-</sup> ,<br>637.4407[M-H-2Glc-H <sub>2</sub> O] <sup>-</sup>                                                                                                                                                   | Double bond<br>hydrated-protopana<br>xatriol+3Glc             |

|     |       |                                                 |           |       |                                                                                                                                                                                                                                                                      |                                                                   |
|-----|-------|-------------------------------------------------|-----------|-------|----------------------------------------------------------------------------------------------------------------------------------------------------------------------------------------------------------------------------------------------------------------------|-------------------------------------------------------------------|
|     |       |                                                 |           |       | 619.4232[M-H-2Glc-2H <sub>2</sub> O],                                                                                                                                                                                                                                |                                                                   |
|     |       |                                                 |           |       | 493.3875[M-H-3Glc],                                                                                                                                                                                                                                                  |                                                                   |
|     |       |                                                 |           |       | 475.3818[M-H-3Glc-H <sub>2</sub> O]                                                                                                                                                                                                                                  |                                                                   |
| R78 | 12.36 | C <sub>56</sub> H <sub>94</sub> O <sub>27</sub> | 1197.5901 | -0.25 | 1111.5878[M-H-Malonyl],<br>817.4951[M-H-Malonyl-Xyl/Ara-Glc],<br>799.4863[M-H-Malonyl-Xyl/Ara-Glc-H <sub>2</sub> O],<br>655.4430[M-H-Malonyl-Xyl/Ara-2Glc],<br>,<br>637.4326[M-H-Malonyl-Xyl/Ara-2Glc-H <sub>2</sub> O],<br>493.3820[M-H-Malonyl-Xyl/Ara-3Glc],<br>, | Double bond<br>hydrated-protopanaxatriol+2Glc+Malonyl Glc+Xyl/Ara |
| R79 | 12.38 | C <sub>48</sub> H <sub>82</sub> O <sub>18</sub> | 945.5444  | 2.22  | 783.4899[M-H-Glc],<br>637.4322[M-H-Glc-Rha],<br>475.3793[M-H-2Glc-Rha]                                                                                                                                                                                               | Ginsenoside Re isomer                                             |
| R80 | 12.47 | C <sub>57</sub> H <sub>92</sub> O <sub>27</sub> | 1207.5728 | -1.49 | 1121.5715[M-H-Malonyl],<br>959.5240[M-H-Malonyl-Glc],<br>797.4722[M-H-Malonyl-2Glc],<br>473.3679[M-H-Malonyl-4Glc]                                                                                                                                                   | Dehydrogenated-protopanaxatriol+3Glc+Malonyl Glc                  |
| R81 | 12.53 | C <sub>47</sub> H <sub>80</sub> O <sub>18</sub> | 931.5276  | 1.07  | 637.4321[M-H-Xyl-Glc],<br>475.3806[M-H-Xyl-2Glc]                                                                                                                                                                                                                     | Notoginsenoside R <sub>1</sub> isomer                             |
| R82 | 12.53 | C <sub>56</sub> H <sub>96</sub> O <sub>26</sub> | 1183.6119 | 0.59  | 1141.6007[M-H-Ac],<br>1123.5983[M-H-Ac-H <sub>2</sub> O],<br>817.4993[M-H-Ac-2Glc],<br>799.4839[M-H-Ac-2Glc-H <sub>2</sub> O],<br>655.4398[M-H-Ac-3Glc],<br>637.4357[M-H-Ac-3Glc-H <sub>2</sub> O],<br>493.3891[M-H-Ac-4Glc]                                         | Double bond<br>hydrated-protopanaxatriol+4Glc+Acetyl Glc          |

|     |       |                                                 |           |       |                                                                                                                                                                                                                                                                                         |                                                                         |
|-----|-------|-------------------------------------------------|-----------|-------|-----------------------------------------------------------------------------------------------------------------------------------------------------------------------------------------------------------------------------------------------------------------------------------------|-------------------------------------------------------------------------|
| R83 | 12.55 | C <sub>53</sub> H <sub>90</sub> O <sub>22</sub> | 1077.5850 | 0.46  | 945.5454[M-H-Ara] <sup>-</sup> ,<br>799.4864[M-H-Ara-Rha] <sup>-</sup> ,<br>637.4312[M-H-Ara-Rha-Glc] <sup>-</sup> ,<br>475.3795[M-H-Ara-Rha-2Glc] <sup>-</sup>                                                                                                                         | Floralginsenoside<br>M<br>isomer/Floralginsen<br>oside N isomer         |
| R84 | 12.56 | C <sub>53</sub> H <sub>90</sub> O <sub>23</sub> | 1093.5801 | 0.55  | 799.4872[M-H-Ara-Glc] <sup>-</sup> ,<br>637.4290[M-H-Ara-2Glc] <sup>-</sup> ,<br>475.3759[M-H-Ara-3Glc] <sup>-</sup>                                                                                                                                                                    | Floralginsenoside<br>P/isomer                                           |
| R85 | 12.58 | C <sub>44</sub> H <sub>74</sub> O <sub>15</sub> | 841.4953  | 0.48  | 799.4750[M-H-Ac] <sup>-</sup> ,<br>653.4247[M-H-Ac-Rha] <sup>-</sup> ,<br>635.4170[M-H-Ac-Rha-H <sub>2</sub> O] <sup>-</sup> ,<br>491.3756[M-H-Ac-Rha-Glc] <sup>-</sup>                                                                                                                 | Oxidated-protopan<br>axatriol+Acetyl<br>Glc+Rha                         |
| R86 | 12.59 | C <sub>51</sub> H <sub>84</sub> O <sub>22</sub> | 1047.5378 | 0.19  | 961.5299[M-H-Malonyl] <sup>-</sup> ,<br>799.4873[M-H-Malonyl-Glc] <sup>-</sup> ,<br>637.4313[M-H-Malonyl-2Glc] <sup>-</sup> ,<br>475.3788[M-H-Malonyl-3Glc] <sup>-</sup>                                                                                                                | Malonyl-ginsenosid<br>e Re <sub>1</sub>                                 |
| R87 | 12.62 | C <sub>48</sub> H <sub>76</sub> O <sub>21</sub> | 987.4805  | 0.41  | 825.4283[M-H-Glc] <sup>-</sup> ,<br>807.4205[M-H-Glc-H <sub>2</sub> O] <sup>-</sup> ,<br>487.3440[M-H-2Glc-Glu A] <sup>-</sup>                                                                                                                                                          | Methyl<br>etherified+Dehydro<br>genated-protopanax<br>atriol+2Glc+Glu A |
| R88 | 12.64 | C <sub>47</sub> H <sub>80</sub> O <sub>18</sub> | 931.5265  | -0.11 | 637.4303[M-H-Xyl-Glc] <sup>-</sup> ,<br>475.3780[M-H-Xyl-2Glc] <sup>-</sup>                                                                                                                                                                                                             | Notoginsenoside R <sub>1</sub><br>isomer                                |
| R89 | 12.66 | C <sub>53</sub> H <sub>90</sub> O <sub>22</sub> | 1077.5859 | 1.30  | 945.5455[M-H-Ara] <sup>-</sup> ,<br>799.4836[M-H-Ara-Rha] <sup>-</sup> ,<br>637.4388[M-H-Ara-Rha-Glc] <sup>-</sup> ,<br>475.3786[M-H-Ara-Rha-2Glc] <sup>-</sup>                                                                                                                         | Floralginsenoside<br>M<br>isomer/Floralginsen<br>oside N isomer         |
| R90 | 12.71 | C <sub>50</sub> H <sub>86</sub> O <sub>21</sub> | 1021.5587 | 0.39  | 979.5484[M-H-Ac] <sup>-</sup> ,<br>817.4941[M-H-Ac-Glc] <sup>-</sup> ,<br>799.4849[M-H-Ac-Glc-H <sub>2</sub> O] <sup>-</sup> ,<br>655.4421[M-H-Ac-2Glc] <sup>-</sup> ,<br>637.4341[M-H-Ac-2Glc-H <sub>2</sub> O] <sup>-</sup> ,<br>619.4265[M-H-Ac-2Glc-2H <sub>2</sub> O] <sup>-</sup> | Double bond<br>hydrated-protopana<br>xatriol+2Glc+Acetyl<br>Glc         |

|     |       |                                                 |                        |       |                                                                                                                                                                                                                                                               |                                                        |
|-----|-------|-------------------------------------------------|------------------------|-------|---------------------------------------------------------------------------------------------------------------------------------------------------------------------------------------------------------------------------------------------------------------|--------------------------------------------------------|
|     |       |                                                 |                        |       | 493.3891[M-H-Ac-3Glc],                                                                                                                                                                                                                                        |                                                        |
|     |       |                                                 |                        |       | 475.3755[M-H-Ac-3Glc-H <sub>2</sub> O] <sup>-</sup>                                                                                                                                                                                                           |                                                        |
| R91 | 12.72 | C <sub>48</sub> H <sub>84</sub> O <sub>19</sub> | 1009.5579 <sup>b</sup> | -0.40 | 963.5515[M-H],<br>801.4996[M-H-Glc],<br>783.4870[M-H-Glc-H <sub>2</sub> O],<br>639.4477[M-H-2Glc],<br>621.4380[M-H-2Glc-H <sub>2</sub> O],<br>477.3950[M-H-3Glc] <sup>-</sup>                                                                                 | Dihydrogenated-protopanaxatriol+3Glc                   |
| R92 | 12.77 | C <sub>51</sub> H <sub>84</sub> O <sub>21</sub> | 1031.5427              | 0.00  | 945.5460[M-H-Malonyl],<br>783.4988[M-H-Malonyl-Glc],<br>637.4340[M-H-Malonyl-Glc-Rha],<br>475.3803[M-H-Malonyl-2Glc-Rha] <sup>-</sup>                                                                                                                         | Malonyl-ginsenoside Re isomer                          |
| R93 | 12.81 | C <sub>50</sub> H <sub>86</sub> O <sub>21</sub> | 1021.5568              | -1.47 | 979.5511[M-H-Ac],<br>799.4850[M-H-Ac-Glc-H <sub>2</sub> O],<br>655.4395[M-H-Ac-2Glc],<br>637.4366[M-H-Ac-2Glc-H <sub>2</sub> O],<br>619.4227[M-H-Ac-2Glc-2H <sub>2</sub> O],<br>493.3882[M-H-Ac-3Glc],<br>475.1438[M-H-Ac-3Glc-H <sub>2</sub> O] <sup>-</sup> | Double bond hydrated-protopanaxatriol+2Glc+Acetyl Glc  |
| R94 | 12.86 | C <sub>44</sub> H <sub>74</sub> O <sub>16</sub> | 903.4963 <sup>b</sup>  | 1.11  | 815.4803[M-H-Ac],<br>653.4260[M-H-Ac-Glc],<br>491.3755[M-H-Ac-2Glc] <sup>-</sup>                                                                                                                                                                              | Oxidated-protopanaxatriol+Glc+Acetyl Glc               |
| R95 | 12.87 | C <sub>51</sub> H <sub>86</sub> O <sub>23</sub> | 1065.5492              | 0.94  | 979.5419[M-H-Malonyl],<br>817.4968[M-H-Malonyl-Glc],<br>799.4857[M-H-Malonyl-Glc-H <sub>2</sub> O],<br>655.4406[M-H-Malonyl-2Glc],<br>637.4335[M-H-Malonyl-2Glc-H <sub>2</sub> O],<br>619.4207[M-H-Malonyl-2Glc-2H <sub>2</sub> O],                           | Double bond hydrated-protopanaxatriol+2Glc+Malonyl Glc |

|      |       |                                                 |                        |       |                                                                                                                                                                                                                                                                        |                                                                |
|------|-------|-------------------------------------------------|------------------------|-------|------------------------------------------------------------------------------------------------------------------------------------------------------------------------------------------------------------------------------------------------------------------------|----------------------------------------------------------------|
|      |       |                                                 |                        |       | 493.3882[M-H-Malonyl-3Glc] <sup>-</sup> ,                                                                                                                                                                                                                              |                                                                |
|      |       |                                                 |                        |       | 475.3813[M-H-Malonyl-3Glc-H <sub>2</sub> O] <sup>-</sup>                                                                                                                                                                                                               |                                                                |
| R96  | 12.90 | C <sub>48</sub> H <sub>82</sub> O <sub>19</sub> | 961.5375               | 0.31  | 799.3901[M-H-Glc] <sup>-</sup> ,<br>637.3561[M-H-2Glc] <sup>-</sup> ,<br>475.3701[M-H-3Glc] <sup>-</sup>                                                                                                                                                               | Notoginsenoside N<br>isomer                                    |
| R97  | 12.90 | C <sub>44</sub> H <sub>74</sub> O <sub>15</sub> | 841.4947               | 1.17  | 637.4321[M-H-Ac-Glc] <sup>-</sup> ,<br>475.3799[M-H-Ac-2Glc] <sup>-</sup>                                                                                                                                                                                              | Acetyl-ginsenoside<br>Rg <sub>1</sub>                          |
| R98  | 12.90 | C <sub>45</sub> H <sub>74</sub> O <sub>17</sub> | 885.4837               | -1.24 | 637.4315[M-H-Malonyl-Glc] <sup>-</sup> ,<br>475.3835[M-H-Malonyl-2Glc] <sup>-</sup>                                                                                                                                                                                    | Malonyl-ginsenosid<br>e Rg <sub>1</sub>                        |
| R99  | 12.93 | C <sub>42</sub> H <sub>72</sub> O <sub>15</sub> | 815.4800               | 0.86  | 815.4816[M-H] <sup>-</sup> ,<br>653.4277[M-H-2Glc] <sup>-</sup> ,<br>491.3759[M-H-2Glc] <sup>-</sup>                                                                                                                                                                   | Ginsenoside Re <sub>5</sub><br>isomer/Ginsenjilino<br>l isomer |
| R100 | 12.99 | C <sub>42</sub> H <sub>72</sub> O <sub>14</sub> | 799.4854               | 1.25  | 637.4279[M-H-Glc] <sup>-</sup> ,<br>475.3794[M-H-2Glc] <sup>-</sup>                                                                                                                                                                                                    | Ginsenoside Rg <sub>1</sub><br>isomer                          |
| R101 | 13.05 | C <sub>51</sub> H <sub>84</sub> O <sub>21</sub> | 1031.5419              | -0.78 | 945.5322[M-H-Malonyl] <sup>-</sup> ,<br>783.4980[M-H-Malonyl-Glc] <sup>-</sup> ,<br>637.4324[M-H-Malonyl-Glc-Rha] <sup>-</sup> ,<br>475.3753[M-H-Malonyl-2Glc-Rha] <sup>-</sup>                                                                                        | Malonyl-ginsenosid<br>e Re isomer                              |
| R102 | 13.05 | C <sub>53</sub> H <sub>88</sub> O <sub>23</sub> | 1137.5687 <sup>b</sup> | -0.53 | 1091.5598[M-H] <sup>-</sup> ,<br>959.5298[M-H-Xyl/Ara] <sup>-</sup> ,<br>797.4694[M-H-Xyl/Ara-Glc] <sup>-</sup> ,<br>779.4532[M-H-Xyl/Ara-Glc-H <sub>2</sub> O] <sup>-</sup> ,<br>635.4178[M-H-Xyl/Ara-2Glc] <sup>-</sup> ,<br>473.3620[M-H-Xyl/Ara-3Glc] <sup>-</sup> | Dehydrogenated-pr<br>otopanaxatriol+3Glc<br>+Xyl/Ara           |
| R103 | 13.07 | C <sub>54</sub> H <sub>92</sub> O <sub>24</sub> | 1123.5906              | 0.53  | 961.5416[M-H-Glc] <sup>-</sup> ,<br>799.4856[M-H-2Glc] <sup>-</sup> ,<br>637.4343[M-H-3Glc] <sup>-</sup> ,<br>475.3789[M-H-4Glc] <sup>-</sup>                                                                                                                          | Koryoginsenoside<br>R <sub>2</sub> isomer                      |

|      |       |                                                 |                        |       |                                                                                                                                                                                                                                     |                                           |
|------|-------|-------------------------------------------------|------------------------|-------|-------------------------------------------------------------------------------------------------------------------------------------------------------------------------------------------------------------------------------------|-------------------------------------------|
| R104 | 13.07 | C <sub>47</sub> H <sub>80</sub> O <sub>18</sub> | 931.5257               | -0.97 | 799.4843[M-H-Xyl] <sup>+</sup> ,<br>637.4326[M-H-Xyl-Glc] <sup>+</sup> ,<br>475.3800[M-H-Xyl-2Glc] <sup>+</sup>                                                                                                                     | Notoginsenoside R <sub>1</sub><br>isomer  |
| R105 | 13.08 | C <sub>48</sub> H <sub>82</sub> O <sub>18</sub> | 945.5401               | -2.33 | 783.4896[M-H-Glc] <sup>+</sup> ,<br>637.4319[M-H-Glc-Rha] <sup>+</sup> ,<br>475.3794[M-H-2Glc-Rha] <sup>+</sup>                                                                                                                     | Ginsenoside Re<br>isomer                  |
| R106 | 13.08 | C <sub>50</sub> H <sub>84</sub> O <sub>19</sub> | 987.5532               | 0.30  | 945.5494[M-H-Ac] <sup>+</sup> ,<br>799.4935[M-H-Ac-Rha] <sup>+</sup> ,<br>637.4324[M-H-Ac-Rha-Glc] <sup>+</sup> ,<br>475.3795[M-H-Ac-Rha-2Glc] <sup>+</sup>                                                                         | Acetyl-ginsenoside<br>Re                  |
| R107 | 13.11 | C <sub>53</sub> H <sub>90</sub> O <sub>23</sub> | 1093.5809              | 1.28  | 799.4849[M-H-Ara-Glc] <sup>+</sup> ,<br>637.4339[M-H-Ara-2Glc] <sup>+</sup> ,<br>475.3758[M-H-Ara-3Glc] <sup>+</sup>                                                                                                                | Floralginsenoside<br>P/isomer             |
| R108 | 13.13 | C <sub>38</sub> H <sub>64</sub> O <sub>11</sub> | 695.4376               | 0.89  | 491.3710[M-H-Ac-Glc] <sup>+</sup>                                                                                                                                                                                                   | Oxidated-protopan<br>axatriol+Acetyl Glc  |
| R109 | 13.15 | C <sub>53</sub> H <sub>86</sub> O <sub>22</sub> | 1073.5525              | -0.65 | 987.4690[M-H-Malonyl] <sup>+</sup> ,<br>945.5401[M-H-Malonyl-Ac] <sup>+</sup> ,<br>783.4783[M-H-Malonyl-Ac-Glc] <sup>+</sup> ,<br>637.4191[M-H-Malonyl-Ac-Glc-Rha] <sup>+</sup> ,<br>475.3823[M-H-Malonyl-Ac-2Glc-Rha] <sup>+</sup> | Acetyl<br>malonyl-ginsenosid<br>e Re      |
| R110 | 13.17 | C <sub>51</sub> H <sub>84</sub> O <sub>22</sub> | 1047.5388              | 1.15  | 961.5355[M-H-Malonyl] <sup>+</sup> ,<br>799.4765[M-H-Malonyl-Glc] <sup>+</sup> ,<br>637.4330[M-H-Malonyl-2Glc] <sup>+</sup> ,<br>475.3807[M-H-Malonyl-3Glc] <sup>+</sup>                                                            | Malonyl-ginsenosid<br>e Re <sub>2</sub>   |
| R111 | 13.17 | C <sub>50</sub> H <sub>84</sub> O <sub>21</sub> | 1019.5435 <sup>b</sup> | 0.78  | 637.4393[M-H-Ac-Ara-Glc] <sup>+</sup> ,<br>475.3796[M-H-Ac-Ara-2Glc] <sup>+</sup>                                                                                                                                                   | Acetyl-ginsenoside<br>Re <sub>4</sub>     |
| R112 | 13.24 | C <sub>54</sub> H <sub>92</sub> O <sub>24</sub> | 1123.5889              | -0.98 | 961.5415[M-H-Glc] <sup>+</sup> ,<br>799.4851[M-H-2Glc] <sup>+</sup> ,<br>637.4243[M-H-3Glc] <sup>+</sup> ,<br>475.3768[M-H-4Glc] <sup>+</sup>                                                                                       | Koryoginsenoside<br>R <sub>2</sub> isomer |

|      |       |                                                 |                        |       |                                                                                                                                                                                                                                                                        |                                                               |
|------|-------|-------------------------------------------------|------------------------|-------|------------------------------------------------------------------------------------------------------------------------------------------------------------------------------------------------------------------------------------------------------------------------|---------------------------------------------------------------|
| R113 | 13.37 | C <sub>44</sub> H <sub>74</sub> O <sub>15</sub> | 841.4953               | 1.95  | 637.4342[M-H-Ac-Glc] <sup>-</sup> ,<br>475.3808[M-H-Ac-2Glc] <sup>-</sup>                                                                                                                                                                                              | Acetyl-ginsenoside<br>Rg <sub>1</sub>                         |
| R114 | 13.42 | C <sub>50</sub> H <sub>84</sub> O <sub>19</sub> | 987.5530               | 0.10  | 945.5394[M-H-Ac] <sup>-</sup> ,<br>799.4955[M-H-Ac-Rha] <sup>-</sup> ,<br>637.4340[M-H-Ac-Rha-Glc] <sup>-</sup> ,<br>475.3804[M-H-Ac-Rha-2Glc] <sup>-</sup>                                                                                                            | Acetyl-ginsenoside<br>Re                                      |
| R115 | 13.44 | C <sub>48</sub> H <sub>82</sub> O <sub>18</sub> | 945.5444               | 2.22  | 783.4913[M-H-Glc] <sup>-</sup> ,<br>637.4334[M-H-Glc-Rha] <sup>-</sup> ,<br>475.3796[M-H-2Glc-Rha] <sup>-</sup>                                                                                                                                                        | Ginsenoside Re<br>isomer                                      |
| R116 | 13.52 | C <sub>53</sub> H <sub>90</sub> O <sub>23</sub> | 1093.5809              | 1.28  | 799.4889[M-H-Ara-Glc] <sup>-</sup> ,<br>637.4341[M-H-Ara-2Glc] <sup>-</sup> ,<br>475.3742[M-H-Ara-3Glc] <sup>-</sup>                                                                                                                                                   | Floralginsenoside<br>P/isomer                                 |
| R117 | 13.54 | C <sub>51</sub> H <sub>84</sub> O <sub>21</sub> | 1031.5422              | -0.48 | 945.5392[M-H-Malonyl] <sup>-</sup> ,<br>783.4880[M-H-Malonyl-Glc] <sup>-</sup> ,<br><br>637.4326[M-H-Malonyl-Glc-Rha] <sup>-</sup> ,<br>475.3799[M-H-Malonyl-2Glc-Rha] <sup>-</sup>                                                                                    | Malonyl-ginsenosid<br>e Re isomer                             |
| R118 | 13.54 | C <sub>50</sub> H <sub>84</sub> O <sub>19</sub> | 987.5533               | 0.41  | 945.5435[M-H-Ac] <sup>-</sup> ,<br>783.4855[M-H-Ac-Glc] <sup>-</sup> ,<br>637.4317[M-H-Ac-Glc-Rha] <sup>-</sup> ,<br>475.3792[M-H-Ac-2Glc-Rha] <sup>-</sup>                                                                                                            | Acetyl-ginsenoside<br>Re                                      |
| R119 | 13.58 | C <sub>42</sub> H <sub>72</sub> O <sub>15</sub> | 815.4792               | -0.12 | 653.4335[M-H-2Glc] <sup>-</sup> ,<br><br>491.3724[M-H-2Glc] <sup>-</sup>                                                                                                                                                                                               | Ginsenoside Re <sub>5</sub><br>isomer/Ginsenjilinol<br>isomer |
| R120 | 13.58 | C <sub>53</sub> H <sub>90</sub> O <sub>25</sub> | 1125.5706 <sup>b</sup> | 1.15  | 1079.5618[M-H] <sup>-</sup> ,<br>947.5281[M-H-Xyl/Ara] <sup>-</sup> ,<br>785.4716[M-H-Xyl/Ara-Glc] <sup>-</sup> ,<br>767.4621[M-H-Xyl/Ara-Glc-H <sub>2</sub> O] <sup>-</sup> ,<br>623.4171[M-H-Xyl/Ara-2Glc] <sup>-</sup> ,<br>461.3641[M-H-Xyl/Ara-3Glc] <sup>-</sup> | Dihydrogenated-pr<br>otopanaxadiol+Xyl/<br>Ara+3Glc           |
| R121 | 13.63 | C <sub>42</sub> H <sub>72</sub> O <sub>14</sub> | 845.4904 <sup>b</sup>  | 0.59  | 799.4853[M-H] <sup>-</sup> ,<br><br>653.4266[M-H-Rha] <sup>-</sup> ,<br><br>491.3747[M-H-Rha-Glc] <sup>-</sup>                                                                                                                                                         | Oxidated-protopan<br>axatriol+Glc+Rha                         |



|      |       |                                                 |                       |       |                                                                                                                                                                                                                                                        |                                             |
|------|-------|-------------------------------------------------|-----------------------|-------|--------------------------------------------------------------------------------------------------------------------------------------------------------------------------------------------------------------------------------------------------------|---------------------------------------------|
| R122 | 13.64 | C <sub>45</sub> H <sub>74</sub> O <sub>17</sub> | 885.4843              | -0.56 | 637.4318[M-H-Malonyl-Glc] <sup>-</sup> ,<br>475.3798[M-H-Malonyl-2Glc] <sup>-</sup>                                                                                                                                                                    | Malonyl-ginsenoside Rf                      |
| R123 | 13.65 | C <sub>42</sub> H <sub>72</sub> O <sub>13</sub> | 783.4904              | 1.15  | 637.4343[M-H-Rha] <sup>-</sup> ,<br>475.3813[M-H-Rha-Glc] <sup>-</sup>                                                                                                                                                                                 | Ginsenoside Rg <sub>2</sub> isomer          |
| R124 | 13.70 | C <sub>54</sub> H <sub>92</sub> O <sub>24</sub> | 1123.5895             | -0.45 | 961.5392[M-H-Glc] <sup>-</sup> ,<br>799.4860[M-H-2Glc] <sup>-</sup> ,<br>637.4319[M-H-3Glc] <sup>-</sup> ,<br>475.3795[M-H-4Glc] <sup>-</sup>                                                                                                          | Koryoginsenoside R <sub>2</sub> isomer      |
| R125 | 13.71 | C <sub>56</sub> H <sub>92</sub> O <sub>26</sub> | 1179.5798             | 0.00  | 1093.5884[M-H-Malonyl] <sup>-</sup> ,<br>961.5355[M-H-Malonyl-Ara/Xyl] <sup>-</sup> ,<br>799.4839[M-H-Malonyl-Ara/Xyl-Glc] <sup>-</sup> ,<br>637.4319[M-H-Malonyl-Ara/Xyl-2Glc] <sup>-</sup> ,<br>,<br>475.3779[M-H-Malonyl-Ara/Xyl-3Glc] <sup>-</sup> | Protopanaxatriol+ Ara/Xyl+2Glc+ Malonyl Glc |
| R126 | 13.71 | C <sub>42</sub> H <sub>70</sub> O <sub>15</sub> | 859.4701 <sup>b</sup> | 1.16  | 813.4616[M-H] <sup>-</sup> ,<br>651.4153[M-H-Glc] <sup>-</sup> ,<br>489.3582[M-H-2Glc] <sup>-</sup>                                                                                                                                                    | Methyl etherified-protopanaxatriol+2Glc     |
| R127 | 13.85 | C <sub>50</sub> H <sub>84</sub> O <sub>19</sub> | 987.5536              | 0.71  | 945.5443[M-H-Ac] <sup>-</sup> ,<br>799.4857[M-H-Ac-Rha] <sup>-</sup> ,<br>783.4902[M-H-Ac-Glc] <sup>-</sup> ,<br>637.4315[M-H-Ac-Glc-Rha] <sup>-</sup> ,<br>475.3795[M-H-Ac-2Glc-Rha] <sup>-</sup>                                                     | Acetyl-ginsenoside Re                       |
| R128 | 13.85 | C <sub>53</sub> H <sub>90</sub> O <sub>23</sub> | 1093.5815             | 1.83  | 799.4887[M-H-Ara-Glc] <sup>-</sup> ,<br>637.4340[M-H-Ara-2Glc] <sup>-</sup> ,<br>475.3739[M-H-Ara-3Glc] <sup>-</sup>                                                                                                                                   | Floralginsenoside P/isomer                  |
| R129 | 13.87 | C <sub>48</sub> H <sub>80</sub> O <sub>19</sub> | 959.5223              | 0.73  | 797.4679[M-H-Glc] <sup>-</sup> ,<br>779.4590[M-H-Glc-H <sub>2</sub> O] <sup>-</sup> ,<br>635.4178[M-H-2Glc] <sup>-</sup> ,<br>617.4015[M-H-2Glc-H <sub>2</sub> O] <sup>-</sup> ,<br>473.3635[M-H-3Glc] <sup>-</sup>                                    | Dehydrogenated-protopanaxatriol+3Glc        |

|      |       |                                                 |                        |       |                                                                                                                                                                                                                                                                                                                                          |                                                                                               |
|------|-------|-------------------------------------------------|------------------------|-------|------------------------------------------------------------------------------------------------------------------------------------------------------------------------------------------------------------------------------------------------------------------------------------------------------------------------------------------|-----------------------------------------------------------------------------------------------|
| R130 | 13.87 | C <sub>51</sub> H <sub>86</sub> O <sub>23</sub> | 1065.5499              | 1.60  | 979.5517[M-H-Malonyl] <sup>-</sup> ,<br>817.5003[M-H-Malonyl-Glc] <sup>-</sup> ,<br>799.4806[M-H-Malonyl-Glc-H <sub>2</sub> O] <sup>-</sup> ,<br>655.4362[M-H-Malonyl-2Glc] <sup>-</sup> ,<br>637.4373[M-H-Malonyl-2Glc-H <sub>2</sub> O] <sup>-</sup> ,<br>493.3889[M-H-Malonyl-3Glc] <sup>-</sup>                                      | Double bond<br>hydrated-protopanaxatriol+2Glc+Malonyl Glc                                     |
| R131 | 13.88 | C <sub>48</sub> H <sub>82</sub> O <sub>18</sub> | 945.5433               | 1.06  | 783.4896[M-H-Glc] <sup>-</sup> ,<br>637.4319[M-H-Glc-Rha] <sup>-</sup> ,<br>475.3794[M-H-2Glc-Rha] <sup>-</sup>                                                                                                                                                                                                                          | Ginsenoside Re<br>isomer                                                                      |
| R132 | 13.88 | C <sub>50</sub> H <sub>84</sub> O <sub>21</sub> | 1019.5422 <sup>b</sup> | -0.49 | 637.4276[M-H-Ac-Xyl/Ara-Glc] <sup>-</sup> ,<br>475.3781[M-H-Ac-Xyl/Ara-2Glc] <sup>-</sup>                                                                                                                                                                                                                                                | Acetyl-ginsenoside<br>Re <sub>4</sub> isomer/<br>Acetyl-notoginsenoside R <sub>1</sub> isomer |
| R133 | 13.90 | C <sub>45</sub> H <sub>72</sub> O <sub>17</sub> | 883.4695               | 0.45  | 635.4197[M-H-Malonyl-Glc] <sup>-</sup> ,<br>617.4048[M-H-Malonyl-Glc-H <sub>2</sub> O] <sup>-</sup> ,<br>473.3653[M-H-Malonyl-2Glc] <sup>-</sup>                                                                                                                                                                                         | Dehydrogenated-protopanaxatriol+Glc+Malonyl Glc                                               |
| R134 | 13.94 | C <sub>58</sub> H <sub>98</sub> O <sub>27</sub> | 1225.6230              | 1.06  | 1093.5801[M-H-Xyl] <sup>-</sup> ,<br>961.5365[M-H-Xyl-Ara] <sup>-</sup> ,<br>799.4849[M-H-Xyl-Ara-Glc] <sup>-</sup> ,<br>781.4739[M-H-Xyl-Ara-Glc-H <sub>2</sub> O] <sup>-</sup> ,<br>637.4312[M-H-Xyl-Ara-2Glc] <sup>-</sup> ,<br>619.4229[M-H-Xyl-Ara-2Glc-H <sub>2</sub> O] <sup>-</sup> ,<br>475.3795[M-H-Xyl-Ara-3Glc] <sup>-</sup> | Protopanaxatriol+3<br>Glc+Xyl+Ara                                                             |
| R135 | 13.95 | C <sub>48</sub> H <sub>82</sub> O <sub>18</sub> | 945.5446               | 2.43  | 783.4995 [M-H-Glc] <sup>-</sup> ,<br>637.4312[M-H-Glc-Rha] <sup>-</sup> ,<br>475.3776[M-H-2Glc-Rha] <sup>-</sup>                                                                                                                                                                                                                         | Ginsenoside Re<br>isomer                                                                      |
| R136 | 14.01 | C <sub>56</sub> H <sub>92</sub> O <sub>26</sub> | 1179.5801              | 0.25  | 1093.5836[M-H-Malonyl] <sup>-</sup> ,<br>961.5344[M-H-Malonyl-Ara/Xyl] <sup>-</sup> ,<br>799.4829[M-H-Malonyl-Ara/Xyl-Glc] <sup>-</sup> ,<br>637.4318[M-H-Malonyl-Ara/Xyl-2Glc] <sup>-</sup>                                                                                                                                             | Protopanaxatriol+<br>Ara/Xyl+2Glc+<br>Malonyl Glc                                             |

|      |       |                                                 |           |       |                                                                                                                                                                                                                                                                                          |                                                                   |
|------|-------|-------------------------------------------------|-----------|-------|------------------------------------------------------------------------------------------------------------------------------------------------------------------------------------------------------------------------------------------------------------------------------------------|-------------------------------------------------------------------|
|      |       |                                                 |           |       | 475.3758[M-H-Malonyl-Ara/Xyl-3Glc] <sup>-</sup>                                                                                                                                                                                                                                          |                                                                   |
| R137 | 14.05 | C <sub>58</sub> H <sub>98</sub> O <sub>27</sub> | 1225.6222 | 0.41  | 1093.5773[M-H-Xyl] <sup>-</sup> ,<br>799.4880[M-H-Xyl-Ara-Glc] <sup>-</sup> ,<br>637.4340[M-H-Xyl-Ara-2Glc] <sup>-</sup> ,<br>475.3803[M-H-Xyl-Ara-3Glc] <sup>-</sup>                                                                                                                    | Protopanaxatriol+3<br>Glc+Xyl+Ara                                 |
| R138 | 14.06 | C <sub>54</sub> H <sub>90</sub> O <sub>24</sub> | 1121.5742 | -0.18 | 1079.5619[M-H-Ac] <sup>-</sup> ,<br>947.5371[M-H-Ac-Xyl/Ara] <sup>-</sup> ,<br>785.4726[M-H-Ac-Xyl/Ara-Glc] <sup>-</sup> ,<br>767.4586[M-H-Ac-Xyl/Ara-Glc-H <sub>2</sub> O] <sup>-</sup> ,<br>623.4160[M-H-Ac-Xyl/Ara-2Glc] <sup>-</sup> ,<br>461.3647[M-H-Ac-Xyl/Ara-3Glc] <sup>-</sup> | Dihydrogenated-pr<br>otopanaxadiol+Xyl/<br>Ara+2Glc+Acetyl<br>Glc |
| R139 | 14.10 | C <sub>42</sub> H <sub>72</sub> O <sub>15</sub> | 815.4791  | -0.25 | 653.4305[M-H-2Glc] <sup>-</sup> ,<br>491.3717[M-H-2Glc] <sup>-</sup>                                                                                                                                                                                                                     | Ginsenoside Res<br>isomer/Ginsenjilinol<br>isomer                 |
| R140 | 14.11 | C <sub>53</sub> H <sub>90</sub> O <sub>23</sub> | 1093.5790 | -0.46 | 799.4835[M-H-Ara-Glc] <sup>-</sup> ,<br>637.4334[M-H-Ara-2Glc] <sup>-</sup> ,<br>475.3791[M-H-Ara-3Glc] <sup>-</sup>                                                                                                                                                                     | Floralginsenoside<br>P/isomer                                     |
| R141 | 14.12 | C <sub>50</sub> H <sub>84</sub> O <sub>19</sub> | 987.5519  | -1.01 | 637.4330[M-H-Ac-Glc-Rha] <sup>-</sup> ,<br>475.3794[M-H-Ac-2Glc-Rha] <sup>-</sup>                                                                                                                                                                                                        | Acetyl-ginsenoside<br>Re                                          |
| R142 | 14.12 | C <sub>48</sub> H <sub>82</sub> O <sub>19</sub> | 961.5377  | 0.52  | 799.4821[M-H-Glc] <sup>-</sup> ,<br>637.4316[M-H-2Glc] <sup>-</sup> ,<br>475.3820[M-H-3Glc] <sup>-</sup>                                                                                                                                                                                 | Notoginsenoside N                                                 |
| R143 | 14.18 | C <sub>51</sub> H <sub>84</sub> O <sub>21</sub> | 1031.5450 | 2.23  | 945.5383[M-H-Malonyl] <sup>-</sup> ,<br>783.4823[M-H-Malonyl-Glc] <sup>-</sup> ,<br>637.4324[M-H-Malonyl-Glc-Rha] <sup>-</sup> ,<br>475.3781[M-H-Malonyl-2Glc-Rha] <sup>-</sup>                                                                                                          | Malonyl-ginsenosid<br>e Re isomer                                 |
| R144 | 14.22 | C <sub>46</sub> H <sub>76</sub> O <sub>16</sub> | 883.5067  | 1.36  | 637.4298[M-H-2Ac-Glc] <sup>-</sup> ,<br>619.4203[M-H-2Ac-Glc-H <sub>2</sub> O] <sup>-</sup> ,<br>475.3790[M-H-2Ac-2Glc] <sup>-</sup>                                                                                                                                                     | Protopanaxatriol+Di<br>acetyl+2Glc                                |

|      |       |                                                 |                        |       |                                                                                                                                                                                                                                                        |                                               |
|------|-------|-------------------------------------------------|------------------------|-------|--------------------------------------------------------------------------------------------------------------------------------------------------------------------------------------------------------------------------------------------------------|-----------------------------------------------|
| R145 | 14.25 | C <sub>51</sub> H <sub>84</sub> O <sub>22</sub> | 1047.5388              | 1.15  | 961.5351[M-H-Malonyl] <sup>+</sup> ,<br>799.4763[M-H-Malonyl-Glc] <sup>+</sup> ,<br>637.4323[M-H-Malonyl-2Glc] <sup>+</sup> ,<br>475.3787[M-H-Malonyl-3Glc] <sup>+</sup>                                                                               | Malonyl-notoginsenoside N isomer              |
| R146 | 14.28 | C <sub>53</sub> H <sub>86</sub> O <sub>22</sub> | 1073.5546              | 1.30  | 945.5434[M-H-Malonyl-Ac] <sup>+</sup> ,<br>783.4911[M-H-Malonyl-Ac-Glc] <sup>+</sup> ,<br>637.4317[M-H-Malonyl-Ac-Glc-Rha] <sup>+</sup> ,<br>475.3812[M-H-Malonyl-Ac-2Glc-Rha] <sup>+</sup>                                                            | Acetyl malonyl-ginsenoside Re                 |
| R147 | 14.31 | C <sub>56</sub> H <sub>92</sub> O <sub>26</sub> | 1179.5796              | -0.17 | 1093.5822[M-H-Malonyl] <sup>+</sup> ,<br>961.5355[M-H-Malonyl-Ara/Xyl] <sup>+</sup> ,<br>799.4937[M-H-Malonyl-Ara/Xyl-Glc] <sup>+</sup> ,<br>637.4329[M-H-Malonyl-Ara/Xyl-2Glc] <sup>+</sup> ,<br>,<br>475.3789[M-H-Malonyl-Ara/Xyl-3Glc] <sup>+</sup> | Protopanaxatriol+ Ara/Xyl+2Glc+ Malonyl Glc   |
| R148 | 14.31 | C <sub>53</sub> H <sub>92</sub> O <sub>23</sub> | 1141.5999 <sup>b</sup> | -0.61 | 1095.5909[M-H] <sup>+</sup> ,<br>963.5483[M-H-Xyl/Ara] <sup>+</sup> ,<br>801.4924[M-H-Xyl/Ara-Glc] <sup>+</sup> ,<br>639.4419[M-H-Xyl/Ara-2Glc] <sup>+</sup> ,<br>477.3871[M-H-Xyl/Ara-3Glc] <sup>+</sup>                                              | Dihydrogenated-protopanaxatriol+3Glc +Xyl/Ara |
| R149 | 14.34 | C <sub>48</sub> H <sub>82</sub> O <sub>19</sub> | 961.5379               | 0.73  | 799.4813[M-H-Glc] <sup>+</sup> ,<br>637.4316[M-H-2Glc] <sup>+</sup> ,<br>475.3793[M-H-3Glc] <sup>+</sup>                                                                                                                                               | Vina-ginsenoside R4                           |
| R150 | 14.38 | C <sub>51</sub> H <sub>84</sub> O <sub>21</sub> | 1031.5441              | 1.36  | 783.4922[M-H-Malonyl-Glc] <sup>+</sup> ,<br>637.4341[M-H-Malonyl-Glc-Rha] <sup>+</sup> ,<br>475.3785 [M-H-Malonyl-2Glc- Rha] <sup>+</sup>                                                                                                              | Malonyl-ginsenoside Re isomer                 |
| R151 | 14.39 | C <sub>50</sub> H <sub>84</sub> O <sub>19</sub> | 987.5522               | -0.71 | 945.5436[M-H-Ac] <sup>+</sup> ,<br>783.4905[M-H-Ac-Glc] <sup>+</sup> ,<br>637.4327[M-H-Ac-Glc-Rha] <sup>+</sup> ,<br>475.3798[M-H-Ac-2Glc-Rha] <sup>+</sup>                                                                                            | Acetyl-ginsenoside Re                         |

|      |       |                                                 |                        |       |                                                                                                                                                                                                                                                           |                                                               |
|------|-------|-------------------------------------------------|------------------------|-------|-----------------------------------------------------------------------------------------------------------------------------------------------------------------------------------------------------------------------------------------------------------|---------------------------------------------------------------|
| R152 | 14.40 | C <sub>54</sub> H <sub>92</sub> O <sub>24</sub> | 1123.5909              | 0.80  | 961.5357[M-H-Glc] <sup>-</sup> ,<br>799.4830 [M-H-2Glc] <sup>-</sup> ,<br>637.4338[M-H-3Glc] <sup>-</sup> ,<br>475.3849[M-H-4Glc] <sup>-</sup>                                                                                                            | Koryoginsenoside<br>R <sub>2</sub> isomer                     |
| R153 | 14.43 | C <sub>42</sub> H <sub>72</sub> O <sub>15</sub> | 815.4790               | -0.37 | 653.4233[M-H-2Glc] <sup>-</sup> ,<br>491.3729[M-H-2Glc] <sup>-</sup>                                                                                                                                                                                      | Ginsenoside Re <sub>5</sub><br>isomer/Ginsenjilinol<br>isomer |
| R154 | 14.49 | C <sub>53</sub> H <sub>90</sub> O <sub>23</sub> | 1093.5813              | 1.65  | 799.4787[M-H-Ara-Glc] <sup>-</sup> ,<br>637.4315[M-H-Ara-2Glc] <sup>-</sup> ,<br>475.3788[M-H-Ara-3Glc] <sup>-</sup>                                                                                                                                      | Floralginsenoside<br>P/isomer                                 |
| R155 | 14.60 | C <sub>46</sub> H <sub>76</sub> O <sub>16</sub> | 929.5119 <sup>b</sup>  | 0.97  | 815.4778[M-H-(E)-but-2-enoyl] <sup>-</sup> ,<br>653.4285[M-H-(E)-but-2-enoyl-Glc] <sup>-</sup> ,<br>491.3733[M-H-(E)-but-2-enoyl-2Glc] <sup>-</sup>                                                                                                       | (E)-But-2-enoyl<br>Ginsenoside Re <sub>5</sub>                |
| R156 | 14.62 | C <sub>53</sub> H <sub>92</sub> O <sub>23</sub> | 1141.5990 <sup>b</sup> | -1.40 | 1095.5920[M-H] <sup>-</sup> ,<br>963.5554[M-H-Xyl/Ara] <sup>-</sup> ,<br>801.4981[M-H-Xyl/Ara-Glc] <sup>-</sup> ,<br>639.4517[M-H-Xyl/Ara-2Glc] <sup>-</sup> ,<br>477.3948[M-H-Xyl/Ara-3Glc] <sup>-</sup>                                                 | Dihydrogenated-pr<br>otopanaxatriol+3Glc<br>+Xyl/Ara          |
| R157 | 14.64 | C <sub>42</sub> H <sub>72</sub> O <sub>14</sub> | 799.4852               | 1.00  | 637.4333[M-H-Glc] <sup>-</sup> ,<br>475.3801[M-H-2Glc] <sup>-</sup>                                                                                                                                                                                       | Ginsenoside Rg <sub>1</sub><br>isomer                         |
| R158 | 14.64 | C <sub>42</sub> H <sub>74</sub> O <sub>15</sub> | 863.5009 <sup>b</sup>  | 0.58  | 817.4905[M-H] <sup>-</sup> ,<br>655.4430[M-H-Glc] <sup>-</sup> ,<br>493.3898[M-H-2Glc] <sup>-</sup>                                                                                                                                                       | Double bond<br>hydrated-protopana<br>xatriol+2Glc             |
| R159 | 14.69 | C <sub>50</sub> H <sub>90</sub> O <sub>27</sub> | 1121.5579              | -1.07 | 959.5171[M-H-Glc] <sup>-</sup> ,<br>797.4680[M-H-2Glc] <sup>-</sup> ,<br>779.4545[M-H-2Glc-H <sub>2</sub> O] <sup>-</sup> ,<br>635.4135[M-H-3Glc] <sup>-</sup> ,<br>617.4081[M-H-3Glc-H <sub>2</sub> O] <sup>-</sup> ,<br>473.3639[M-H-4Glc] <sup>-</sup> | Dehydrogenated-pr<br>otopanaxatriol+4Glc                      |

|      |       |                                                 |                        |       |                                                                                                                                                                                                                                                                                                                                          |                                                                                                                                                                                                  |
|------|-------|-------------------------------------------------|------------------------|-------|------------------------------------------------------------------------------------------------------------------------------------------------------------------------------------------------------------------------------------------------------------------------------------------------------------------------------------------|--------------------------------------------------------------------------------------------------------------------------------------------------------------------------------------------------|
|      |       |                                                 |                        |       | 455.3554[M-H-4Glc-H <sub>2</sub> O] <sup>-</sup>                                                                                                                                                                                                                                                                                         |                                                                                                                                                                                                  |
| R160 | 14.79 | C <sub>54</sub> H <sub>90</sub> O <sub>23</sub> | 1105.5779              | -1.45 | 943.5278[M-H-Glc] <sup>-</sup> ,<br>781.4628[M-H-2Glc] <sup>-</sup> ,<br>763.4622[M-H-2Glc-H <sub>2</sub> O] <sup>-</sup> ,<br>619.4229[M-H-3Glc] <sup>-</sup> ,<br>601.4104[M-H-3Glc-H <sub>2</sub> O] <sup>-</sup> ,<br>457.3698[M-H-4Glc] <sup>-</sup>                                                                                | Dehydrated-protopanaxatriol+4Glc                                                                                                                                                                 |
| R161 | 14.83 | C <sub>42</sub> H <sub>68</sub> O <sub>15</sub> | 811.4486               | 0.74  | 649.3958[M-H-Glc] <sup>-</sup> ,<br>473.3633[M-H-Glc-Glu A] <sup>-</sup>                                                                                                                                                                                                                                                                 | Dehydrogenated-protopanaxatriol+Glc+Glu A                                                                                                                                                        |
| R162 | 14.88 | C <sub>50</sub> H <sub>84</sub> O <sub>21</sub> | 1019.5433 <sup>b</sup> | 0.59  | 931.5258[M-H-Ac] <sup>-</sup> ,<br>637.4310[M-H-Ac-Xyl-Glc] <sup>-</sup> ,<br>475.3778[M-H-Ac-Xyl-2Glc] <sup>-</sup>                                                                                                                                                                                                                     | Acetyl-notoginsenoside R <sub>1</sub>                                                                                                                                                            |
| R163 | 14.95 | C <sub>50</sub> H <sub>84</sub> O <sub>20</sub> | 1003.5495              | 1.69  | 961.5333[M-H-Ac] <sup>-</sup> ,<br>799.4811[M-H-Ac-Glc] <sup>-</sup> ,<br>637.4338[M-H-Ac-2Glc] <sup>-</sup> ,<br>475.3813[M-H-Ac-3Glc] <sup>-</sup>                                                                                                                                                                                     | Acetyl ginsenoside Re <sub>1</sub> / Acetyl ginsenoside Re <sub>2</sub> / Acetyl ginsenoside Re <sub>3</sub> / Acetyl ginsenoside 20-Gluco-ginsenoside R <sub>f</sub> / Acetyl notoginsenoside N |
| R164 | 14.96 | C <sub>58</sub> H <sub>98</sub> O <sub>27</sub> | 1225.6237              | 1.63  | 1093.5796[M-H-Xyl] <sup>-</sup> ,<br>961.5352[M-H-Xyl-Ara] <sup>-</sup> ,<br>799.4846[M-H-Xyl-Ara-Glc] <sup>-</sup> ,<br>781.4697[M-H-Xyl-Ara-Glc-H <sub>2</sub> O] <sup>-</sup> ,<br>637.4341[M-H-Xyl-Ara-2Glc] <sup>-</sup> ,<br>619.4268[M-H-Xyl-Ara-2Glc-H <sub>2</sub> O] <sup>-</sup> ,<br>475.3808[M-H-Xyl-Ara-3Glc] <sup>-</sup> | Protopanaxatriol+3Glc+Xyl+Ara                                                                                                                                                                    |
| R165 | 14.97 | C <sub>42</sub> H <sub>74</sub> O <sub>15</sub> | 863.4991 <sup>b</sup>  | -1.51 | 817.4826[M-H] <sup>-</sup> ,<br>655.4399[M-H-Glc] <sup>-</sup>                                                                                                                                                                                                                                                                           | Double bond hydrated-protopanaxatriol                                                                                                                                                            |

|      |       |                                                  |           |       |                                                                                                                                                                                                                                                     |                                                |
|------|-------|--------------------------------------------------|-----------|-------|-----------------------------------------------------------------------------------------------------------------------------------------------------------------------------------------------------------------------------------------------------|------------------------------------------------|
|      |       |                                                  |           |       | 493.3890[M-H-2Glc] <sup>-</sup>                                                                                                                                                                                                                     | xatriol+2Glc                                   |
| R166 | 15.06 | C <sub>49</sub> H <sub>82</sub> O <sub>20</sub>  | 989.5315  | -0.61 | 947.5269[M-H-Ac],<br>785.4678[M-H-Ac-Glc],<br>767.4631[M-H-Ac-Glc-H <sub>2</sub> O],<br>623.4160[M-H-Ac-2Glc],<br>461.3662[M-H-Ac-3Glc] <sup>-</sup>                                                                                                | Dihydrogenated-protopanaxadiol+2Glc+Acetyl Glc |
| R167 | 15.08 | C <sub>51</sub> H <sub>84</sub> O <sub>22</sub>  | 1047.5371 | -0.48 | 961.5437[M-H-Malonyl],<br>799.4800[M-H-Malonyl-Glc],<br>637.4400[M-H-Malonyl-2Glc],<br>475.3819[M-H-Malonyl-3Glc] <sup>-</sup>                                                                                                                      | Malonyl-notoginsenoside N isomer               |
| R168 | 15.11 | C <sub>46</sub> H <sub>76</sub> O <sub>16</sub>  | 883.5042  | -1.47 | 637.4325[M-H-2Ac-Glc],<br>619.4222[M-H-2Ac-Glc-H <sub>2</sub> O],<br>475.3806[M-H-2Ac-2Glc] <sup>-</sup>                                                                                                                                            | Protopanaxatriol+Di acetyl+2Glc                |
| R169 | 15.11 | C <sub>60</sub> H <sub>102</sub> O <sub>27</sub> | 1253.6544 | 1.12  | 1091.6016[M-H-Glc],<br>1073.5828[M-H-Glc-H <sub>2</sub> O],<br>929.5506[M-H-2Glc],<br>911.5439[M-H-2Glc-H <sub>2</sub> O],<br>767.4948[M-H-3Glc],<br>749.4890[M-H-3Glc-H <sub>2</sub> O],<br>605.4434[M-H-4Glc],<br>443.3906[M-H-5Glc] <sup>-</sup> | Deoxidated-protopanaxadiol+5Glc                |
| R170 | 15.22 | C <sub>42</sub> H <sub>72</sub> O <sub>15</sub>  | 815.4797  | 0.49  | 653.4265[M-H-2Glc],<br>491.3747[M-H-2Glc] <sup>-</sup>                                                                                                                                                                                              | Ginsenoside Re isomer/Ginsenjilol isomer       |
| R171 | 15.27 | C <sub>50</sub> H <sub>84</sub> O <sub>19</sub>  | 987.5527  | -0.20 | 945.5394[M-H-Ac],<br>783.4873[M-H-Ac-Glc],<br>637.4286[M-H-Ac-Glc-Rha],<br>475.3809[M-H-Ac-2Glc-Rha] <sup>-</sup>                                                                                                                                   | Acetyl-ginsenoside Re                          |

|      |       |                                                 |                       |       |                                                                                                                                                                                  |                                                                                                                                                                                                                                                                |
|------|-------|-------------------------------------------------|-----------------------|-------|----------------------------------------------------------------------------------------------------------------------------------------------------------------------------------|----------------------------------------------------------------------------------------------------------------------------------------------------------------------------------------------------------------------------------------------------------------|
| R172 | 15.32 | C <sub>42</sub> H <sub>72</sub> O <sub>14</sub> | 799.4854              | 1.25  | 637.4328[M-H-Glc],<br>491.3747[M-H-Glc-Rha]                                                                                                                                      | Oxidated-protopan<br>axatriol+Glc+Rha                                                                                                                                                                                                                          |
| R173 | 15.35 | C <sub>52</sub> H <sub>84</sub> O <sub>23</sub> | 1075.5315             | -0.93 | 961.5285[M-H-(E)-but-2-enoyl],<br>799.4877[M-H-(E)-but-2-enoyl-Glc],<br>637.4316[M-H-(E)-but-2-enoyl-2Glc],<br>475.3819[M-H-(E)-but-2-enoyl-3Glc]                                | (E)-But-2-enoyl-gins<br>enoside<br>Re <sub>1</sub> /(E)-But-2-enoyl<br>ginsenoside<br>Re <sub>2</sub> /(E)-But-2-enoyl<br>ginsenoside<br>Re <sub>3</sub> /(E)-But-2-enoyl<br>ginsenoside<br>20-Gluco-ginsensi<br>de<br>Rf/(E)-But-2-enoyl<br>notoginsenoside N |
| R174 | 15.46 | C <sub>48</sub> H <sub>82</sub> O <sub>19</sub> | 961.5378              | 0.62  | 799.4857[M-H-Glc],<br>637.4321[M-H-2Glc],<br>475.3797[M-H-3Glc]                                                                                                                  | Vina-ginsenoside R <sub>4</sub><br>isomer                                                                                                                                                                                                                      |
| R175 | 15.53 | C <sub>50</sub> H <sub>84</sub> O <sub>19</sub> | 987.5520              | -0.91 | 945.5396[M-H-Ac],<br>783.4919[M-H-Ac-Glc],<br>637.4324[M-H-Ac-Glc-Rha],<br>475.3675[M-H-Ac-2Glc-Rha]                                                                             | Acetyl-ginsenoside<br>Re                                                                                                                                                                                                                                       |
| R176 | 15.58 | C <sub>56</sub> H <sub>92</sub> O <sub>26</sub> | 1179.5796             | -0.17 | 1093.5802[M-H-Malonyl],<br>961.5504[M-H-Malonyl-Ara/Xyl],<br>799.4852[M-H-Malonyl-Ara/Xyl-Glc],<br>637.4352[M-H-Malonyl-Ara/Xyl-2Glc]<br>,<br>475.3770[M-H-Malonyl-Ara/Xyl-3Glc] | Protopanaxatriol+<br>Ara/Xyl+2Glc+<br>Malonyl Glc                                                                                                                                                                                                              |
| R177 | 15.63 | C <sub>48</sub> H <sub>82</sub> O <sub>17</sub> | 975.5547 <sup>b</sup> | 1.85  | 929.5592[M-H],<br>767.4908[M-H-Glc],<br>621.4373[M-H-Glc-Rha],<br>475.3784[M-H-Glc-2Rha]                                                                                         | Protopanaxatriol+<br>Glc+2Rha                                                                                                                                                                                                                                  |
| R178 | 15.66 | C <sub>58</sub> H <sub>98</sub> O <sub>27</sub> | 1225.6140             | 1.88  | 1093.5677[M-H-Xyl],<br>961.5416[M-H-Xyl-Ara],                                                                                                                                    | Protopanaxatriol+3<br>Glc+Xyl+Ara                                                                                                                                                                                                                              |



|      |       |                                                  |           |       |                                                                                                                                                                                                                                                                                                                                                                                                                                                |                                                         |
|------|-------|--------------------------------------------------|-----------|-------|------------------------------------------------------------------------------------------------------------------------------------------------------------------------------------------------------------------------------------------------------------------------------------------------------------------------------------------------------------------------------------------------------------------------------------------------|---------------------------------------------------------|
|      |       |                                                  |           |       | 799.4874 [M-H-Xyl-Ara-Glc] <sup>-</sup> ,<br>781.4717[M-H-Xyl-Ara-Glc-H <sub>2</sub> O] <sup>-</sup> ,<br>637.4327[M-H-Xyl-Ara-2Glc] <sup>-</sup> ,<br>619.4221[M-H-Xyl-Ara-2Glc-H <sub>2</sub> O] <sup>-</sup> ,<br>475.3810[M-H-Xyl-Ara-3Glc] <sup>-</sup>                                                                                                                                                                                   |                                                         |
| R179 | 15.70 | C <sub>61</sub> H <sub>98</sub> O <sub>30</sub>  | 1309.6077 | 0.92  | 1223.6089[M-H-Malonyl] <sup>-</sup> ,<br>1091.5605[M-H-Malonyl-Xyl] <sup>-</sup> ,<br>959.5303[M-H-Malonyl-Xyl-Ara] <sup>-</sup> ,<br>797.4695[M-H-Malonyl-Xyl-Ara-Glc] <sup>-</sup> ,<br>779.4562[M-H-Malonyl-Xyl-Ara-Glc-H <sub>2</sub> O] <sup>-</sup> ,<br>635.4097[M-H-Malonyl-Xyl-Ara-2Glc] <sup>-</sup> ,<br>,<br>617.4057[M-H-Malonyl-Xyl-Ara-2Glc-H <sub>2</sub> O] <sup>-</sup> ,<br>473.3648[M-H-Malonyl-Xyl-Ara-3Glc] <sup>-</sup> | Dehydrogenated-protopanaxatriol+2Glc+MalonylGlc+Xyl+Ara |
| R180 | 15.72 | C <sub>42</sub> H <sub>72</sub> O <sub>14</sub>  | 799.4854  | 1.25  | 637.4229[M-H-Glc] <sup>-</sup> ,<br>491.3701[M-H-Glc-Rha] <sup>-</sup>                                                                                                                                                                                                                                                                                                                                                                         | Oxidated-protopanaxatriol+Glc+Rha                       |
| R181 | 15.76 | C <sub>64</sub> H <sub>108</sub> O <sub>31</sub> | 1371.6781 | -1.09 | 1239.6310[M-H-Xyl] <sup>-</sup> ,<br>1107.5912[M-H-Xyl-Ara] <sup>-</sup> ,<br>945.5331[M-H-Xyl-Ara-Glc] <sup>-</sup> ,<br>783.4913[M-H-Xyl-Ara-2Glc] <sup>-</sup> ,<br>621.4344[M-H-Xyl-Ara-3Glc] <sup>-</sup> ,<br>459.3840[M-H-Xyl-Ara-4Glc] <sup>-</sup>                                                                                                                                                                                    | Protopanaxadiol+Xyl+Ara+4Glc                            |
| R182 | 15.78 | C <sub>46</sub> H <sub>76</sub> O <sub>16</sub>  | 883.5063  | 0.91  | 637.4381[M-H-2Ac-Glc] <sup>-</sup> ,<br>619.4207[M-H-2Ac-Glc-H <sub>2</sub> O] <sup>-</sup> ,<br>475.3790[M-H-2Ac-2Glc] <sup>-</sup>                                                                                                                                                                                                                                                                                                           | Protopanaxatriol+Diacetyl+2Glc                          |

|      |       |                                                  |                        |       |                                                                                                                                                                                                                                                                                                                             |                                                          |
|------|-------|--------------------------------------------------|------------------------|-------|-----------------------------------------------------------------------------------------------------------------------------------------------------------------------------------------------------------------------------------------------------------------------------------------------------------------------------|----------------------------------------------------------|
| R183 | 15.86 | C <sub>57</sub> H <sub>92</sub> O <sub>27</sub>  | 1207.5765              | 1.57  | 1121.5773[M-H-Malonyl] <sup>-</sup> ,<br>797.4738[M-H-Malonyl-2Glc] <sup>-</sup> ,<br>779.4620[M-H-Malonyl-2Glc-H <sub>2</sub> O] <sup>-</sup> ,<br>635.4109[M-H-Malonyl-3Glc] <sup>-</sup> ,<br>617.4037[M-H-Malonyl-3Glc-H <sub>2</sub> O] <sup>-</sup> ,<br>473.3679[M-H-Malonyl-4Glc] <sup>-</sup>                      | Dehydrogenated-protopanaxatriol+3Glc+Malonyl Glc         |
| R184 | 15.89 | C <sub>60</sub> H <sub>102</sub> O <sub>28</sub> | 1269.6487              | 0.63  | 1107.5951[M-H-Glc] <sup>-</sup> ,<br>945.5402[M-H-2Glc] <sup>-</sup> ,<br>783.4882[M-H-3Glc] <sup>-</sup> ,<br>621.4368[M-H-4Glc] <sup>-</sup> ,<br>459.3851[M-H-5Glc] <sup>-</sup>                                                                                                                                         | Protopanaxadiol+5Glc                                     |
| R185 | 15.96 | C <sub>42</sub> H <sub>72</sub> O <sub>13</sub>  | 783.4890               | -0.64 | 637.4326[M-H-Rha] <sup>-</sup> ,<br>475.3784[M-H-Rha-Glc] <sup>-</sup>                                                                                                                                                                                                                                                      | Ginsenoside Rg <sub>2</sub> isomer                       |
| R186 | 16.10 | C <sub>48</sub> H <sub>80</sub> O <sub>19</sub>  | 1005.5276 <sup>b</sup> | 0.60  | 959.5185[M-H] <sup>-</sup> ,<br>797.4698[M-H-Glc] <sup>-</sup> ,<br>779.4591[M-H-Glc-H <sub>2</sub> O] <sup>-</sup> ,<br>635.4156[M-H-2Glc] <sup>-</sup> ,<br>617.4064[M-H-2Glc-H <sub>2</sub> O] <sup>-</sup> ,<br>473.3707[M-H-3Glc] <sup>-</sup> ,<br>455.3529[M-H-3Glc-H <sub>2</sub> O] <sup>-</sup>                   | Dehydrogenated-protopanaxatriol+3Glc                     |
| R187 | 16.11 | C <sub>56</sub> H <sub>90</sub> O <sub>26</sub>  | 1177.5656              | 1.19  | 1091.5630[M-H-Malonyl] <sup>-</sup> ,<br>959.5215[M-H-Malonyl-Xyl/Ara] <sup>-</sup> ,<br>797.4700[M-H-Malonyl-Xyl/Ara-Glc] <sup>-</sup> ,<br>779.4589[M-H-Malonyl-Xyl/Ara-Glc-H <sub>2</sub> O] <sup>-</sup> ,<br>635.4180[M-H-Malonyl-Xyl/Ara-2Glc] <sup>-</sup> ,<br>,<br>617.4060[M-H-Malonyl-Xyl/Ara-2Glc- <sup>-</sup> | Dehydrogenated-protopanaxatriol+Malonyl Glc+2Glc+Xyl/Ara |

|      |       |                                                  |                       |       | H <sub>2</sub> O <sup>+</sup> ,                                                                                                                                          |                                                                                                                                                                                     |
|------|-------|--------------------------------------------------|-----------------------|-------|--------------------------------------------------------------------------------------------------------------------------------------------------------------------------|-------------------------------------------------------------------------------------------------------------------------------------------------------------------------------------|
|      |       |                                                  |                       |       | 473.3636[M-H-Malonyl-Xyl/Ara-3Glc] <sup>-</sup>                                                                                                                          |                                                                                                                                                                                     |
| R188 | 16.14 | C <sub>51</sub> H <sub>84</sub> O <sub>22</sub>  | 1047.5382             | 0.57  | 961.5370[M-H-Malonyl] <sup>-</sup> ,<br>799.4870[M-H-Malonyl-Glc] <sup>-</sup> ,<br>637.4325[M-H-Malonyl-2Glc] <sup>-</sup> ,<br>475.3807[M-H-Malonyl-3Glc] <sup>-</sup> | Malonyl-notoginsenoside N                                                                                                                                                           |
| R189 | 16.19 | C <sub>48</sub> H <sub>82</sub> O <sub>19</sub>  | 961.5376              | 0.42  | 799.4960[M-H-Glc] <sup>-</sup> ,<br>637.4346[M-H-2Glc] <sup>-</sup> ,<br>475.3803[M-H-3Glc] <sup>-</sup>                                                                 | Vina-ginsenoside R <sub>4</sub> isomer                                                                                                                                              |
| R190 | 16.25 | C <sub>54</sub> H <sub>92</sub> O <sub>23</sub>  | 1107.5951             | 0.00  | 945.5400[M-H-Glc] <sup>-</sup> ,<br>783.4893[M-H-2Glc] <sup>-</sup> ,<br>621.4345[M-H-3Glc] <sup>-</sup> ,<br>459.3834[M-H-4Glc] <sup>-</sup>                            | Ginsenoside Rb <sub>1</sub> isomer                                                                                                                                                  |
| R191 | 16.25 | C <sub>50</sub> H <sub>84</sub> O <sub>20</sub>  | 1003.5493             | 1.49  | 961.5358[M-H-Ac] <sup>-</sup> ,<br>799.4869[M-H-Ac-Glc] <sup>-</sup> ,<br>637.4338[M-H-Ac-2Glc] <sup>-</sup> ,<br>475.3797[M-H-Ac-3Glc] <sup>-</sup>                     | Acetyl ginsenoside Re <sub>1</sub> / Acetyl ginsenoside Re <sub>2</sub> / Acetyl ginsenoside Re <sub>3</sub> / Acetyl ginsenoside 20-Gluco-ginsenoside Rf/ Acetyl notoginsenoside N |
| R192 | 16.26 | C <sub>42</sub> H <sub>72</sub> O <sub>14</sub>  | 799.4854              | 1.25  | 637.4323[M-H-Glc] <sup>-</sup> ,<br>475.3793[M-H-2Glc] <sup>-</sup>                                                                                                      | Ginsenoside Rf isomer                                                                                                                                                               |
| R193 | 16.30 | C <sub>42</sub> H <sub>72</sub> O <sub>15</sub>  | 815.4791              | -0.25 | 815.4696[M-H] <sup>-</sup> ,<br>653.4249[M-H-2Glc] <sup>-</sup> ,<br>491.3750[M-H-2Glc] <sup>-</sup>                                                                     | Ginsenoside Re <sub>5</sub> isomer/Ginsengjilanol isomer                                                                                                                            |
| R194 | 16.31 | C <sub>42</sub> H <sub>70</sub> O <sub>14</sub>  | 843.4754 <sup>b</sup> | 1.42  | 635.4182[M-H-Glc] <sup>-</sup> ,<br>473.3656[M-H-2Glc] <sup>-</sup>                                                                                                      | Dehydrogenated-protopanaxatriol+2Glc                                                                                                                                                |
| R195 | 16.36 | C <sub>59</sub> H <sub>100</sub> O <sub>27</sub> | 1239.6388             | 1.13  | 1107.5933[M-H-Glc] <sup>-</sup> ,<br>945.5407[M-H-Glc-Xyl] <sup>-</sup> ,<br>783.4976[M-H-2Glc-Xyl] <sup>-</sup>                                                         | Notoginsenoside R <sub>4</sub> isomer/Ginsenoside Ra <sub>3</sub> isomer                                                                                                            |

|      |       |                                                  |                        |       |                                                                                                                                                                                                                                                                                                                                                                           |                                                         |
|------|-------|--------------------------------------------------|------------------------|-------|---------------------------------------------------------------------------------------------------------------------------------------------------------------------------------------------------------------------------------------------------------------------------------------------------------------------------------------------------------------------------|---------------------------------------------------------|
|      |       |                                                  |                        |       | 621.4368[M-H-3Glc-Xyl] <sup>-</sup> ,<br>459.3808[M-H-4Glc-Xyl] <sup>-</sup>                                                                                                                                                                                                                                                                                              |                                                         |
| R196 | 16.39 | C <sub>46</sub> H <sub>76</sub> O <sub>16</sub>  | 883.5073               | 2.04  | 637.4356[M-H-2Ac-Glc] <sup>-</sup> ,<br>619.4208[M-H-2Ac-Glc-H <sub>2</sub> O] <sup>-</sup> ,<br>475.3770[M-H-2Ac-2Glc] <sup>-</sup>                                                                                                                                                                                                                                      | Protopanaxatriol+Di<br>acetyl+2Glc                      |
| R197 | 16.41 | C <sub>46</sub> H <sub>76</sub> O <sub>16</sub>  | 883.5072               | 1.92  | 637.4335[M-H-2Ac-Glc] <sup>-</sup> ,<br>619.4194[M-H-2Ac-Glc-H <sub>2</sub> O] <sup>-</sup> ,<br>475.3767[M-H-2Ac-2Glc] <sup>-</sup>                                                                                                                                                                                                                                      | Protopanaxatriol+Di<br>acetyl+2Glc                      |
| R198 | 16.42 | C <sub>69</sub> H <sub>116</sub> O <sub>35</sub> | 1549.7268 <sup>b</sup> | -0.39 | 1503.7040[M-H] <sup>-</sup> ,<br>1341.6509[M-H-Glc] <sup>-</sup> ,<br>1209.6332[M-H-Glc-Xyl] <sup>-</sup> ,<br>1077.5833[M-H-Glc-Xyl-Ara] <sup>-</sup> ,<br>945.5369[M-H-Glc-Xyl-Ara-Xyl/Ara] <sup>-</sup> ,<br>783.4903[M-H-2Glc-Xyl-Ara-Xyl/Ara] <sup>-</sup> ,<br>621.4357[M-H-3Glc-Xyl-Ara-Xyl/Ara] <sup>-</sup> ,<br>459.3835[M-H-4Glc-Xyl-Ara-Xyl/Ara] <sup>-</sup> | Protopanaxadiol+X<br>yl+Ara+Xyl/Ara+4G<br>lc            |
| R199 | 16.49 | C <sub>50</sub> H <sub>82</sub> O <sub>20</sub>  | 1001.5327              | 0.60  | 797.4761[M-H-Ac-Glc] <sup>-</sup> ,<br>779.4597[M-H-Ac-Glc-H <sub>2</sub> O] <sup>-</sup> ,<br>617.4083[M-H-Ac-2Glc-H <sub>2</sub> O] <sup>-</sup> ,<br>455.3528[M-H-Ac-3Glc-H <sub>2</sub> O] <sup>-</sup>                                                                                                                                                               | Dehydrogenated-pr<br>otopanaxatriol+2Glc<br>+Acetyl Glc |
| R200 | 16.50 | C <sub>42</sub> H <sub>72</sub> O <sub>14</sub>  | 799.4844               | 0.00  | 637.4310[M-H-Glc] <sup>-</sup> ,<br>475.3797[M-H-2Glc] <sup>-</sup>                                                                                                                                                                                                                                                                                                       | Ginsenoside Rf <sup>a</sup>                             |
| R201 | 16.55 | C <sub>59</sub> H <sub>100</sub> O <sub>27</sub> | 1239.6376              | 0.16  | 1107.5955[M-H-Glc] <sup>-</sup> ,<br>945.5423[M-H-Glc-Xyl] <sup>-</sup> ,<br>783.4895[M-H-2Glc-Xyl] <sup>-</sup> ,<br>621.4370[M-H-3Glc-Xyl] <sup>-</sup> ,<br>459.3840[M-H-4Glc-Xyl] <sup>-</sup>                                                                                                                                                                        | Notoginsenoside R4 <sup>a</sup>                         |
| R202 | 16.65 | C <sub>56</sub> H <sub>92</sub> O <sub>26</sub>  | 1179.5806              | 0.68  | 1093.5795[M-H-Malonyl] <sup>-</sup> ,<br>961.5365[M-H-Malonyl-Ara/Xyl] <sup>-</sup>                                                                                                                                                                                                                                                                                       | Protopanaxatriol+<br>Ara/Xyl+2Glc+<br>Malonyl Glc       |

|      |       |                                                  |           |       |                                                                                                                                                                                                                                                                                     |                                                                                                     |
|------|-------|--------------------------------------------------|-----------|-------|-------------------------------------------------------------------------------------------------------------------------------------------------------------------------------------------------------------------------------------------------------------------------------------|-----------------------------------------------------------------------------------------------------|
|      |       |                                                  |           |       | 799.4838[M-H-Malonyl-Ara/Xyl-Glc] <sup>-</sup> ,<br>637.4296[M-H-Malonyl-Ara/Xyl-2Glc] <sup>-</sup> ,<br>,                                                                                                                                                                          |                                                                                                     |
|      |       |                                                  |           |       | 475.3789[M-H-Malonyl-Ara/Xyl-3Glc] <sup>-</sup>                                                                                                                                                                                                                                     |                                                                                                     |
| R203 | 16.68 | C <sub>51</sub> H <sub>84</sub> O <sub>22</sub>  | 1047.5382 | 0.57  | 961.5382[M-H-Malonyl] <sup>-</sup> ,<br>799.4823[M-H-Malonyl-Glc] <sup>-</sup> ,<br>637.4295 [M-H-Malonyl-2Glc] <sup>-</sup> ,<br>475.3821[M-H-Malonyl-3Glc] <sup>-</sup>                                                                                                           | Malonyl-vina-ginse<br>noside R <sub>4</sub>                                                         |
| R204 | 16.69 | C <sub>61</sub> H <sub>102</sub> O <sub>28</sub> | 1281.6475 | -0.31 | 1239.6373[M-H-Ac] <sup>-</sup> ,<br>1107.5952[M-H-Ac-Xyl/Ara] <sup>-</sup> ,<br>945.5424[M-H-Ac-Xyl/Ara-Glc] <sup>-</sup> ,<br>783.4902[M-H-Ac-Xyl/Ara-2Glc] <sup>-</sup> ,<br>621.4371[M-H-Ac-Xyl/Ara-3Glc] <sup>-</sup> ,<br>459.3857[M-H-Ac-Xyl/Ara-4Glc] <sup>-</sup>           | Acetyl-ginsenoside<br>Ra <sub>3</sub> /Acetyl-notogins<br>enoside R <sub>4</sub>                    |
| R205 | 16.71 | C <sub>57</sub> H <sub>94</sub> O <sub>26</sub>  | 1193.5942 | -1.09 | 1107.5931[M-H-Malonyl] <sup>-</sup> ,<br>945.5436[M-H-Malonyl-Glc] <sup>-</sup> ,<br>783.4905[M-H-Malonyl-2Glc] <sup>-</sup> ,<br>621.4352[M-H-Malonyl-3Glc] <sup>-</sup> ,<br>459.3823[M-H-Malonyl-4Glc] <sup>-</sup>                                                              | Malonyl-ginsenosid<br>e Rb <sub>1</sub> isomer                                                      |
| R206 | 16.74 | C <sub>62</sub> H <sub>102</sub> O <sub>30</sub> | 1325.6384 | 0.45  | 1239.6379[M-H-Malonyl] <sup>-</sup> ,<br>1107.5953[M-H-Malonyl-Xyl] <sup>-</sup> ,<br>945.5336[M-H-Malonyl-Xyl-Glc] <sup>-</sup> ,<br>783.4839[M-H-Malonyl-Xyl-2Glc] <sup>-</sup> ,<br>621.4380[M-H-Malonyl-Xyl-3Glc] <sup>-</sup> ,<br>459.3823[M-H-Malonyl-Xyl-4Glc] <sup>-</sup> | Malonyl-notoginsen<br>oside R <sub>4</sub><br>isomer/Malonyl-gin<br>senoside Ra <sub>3</sub> isomer |
| R207 | 16.76 | C <sub>48</sub> H <sub>82</sub> O <sub>19</sub>  | 961.5383  | 1.14  | 799.4841[M-H-Glc] <sup>-</sup> ,<br>637.4267[M-H-2Glc] <sup>-</sup> ,<br>475.3792[M-H-3Glc] <sup>-</sup>                                                                                                                                                                            | Vina-ginsenoside R <sub>4</sub><br>isomer                                                           |
| R208 | 16.78 | C <sub>64</sub> H <sub>108</sub> O <sub>31</sub> | 1371.6790 | -0.44 | 1239.6427[M-H-Xyl] <sup>-</sup> ,<br>1107.5883[M-H-Xyl-Ara] <sup>-</sup> ,                                                                                                                                                                                                          | Protopanaxadiol+X<br>yl+Ara+4Glc                                                                    |

|      |       |                                                  |           |       |                                                                                                                                                                                                                                                                                                    |                                                                                      |
|------|-------|--------------------------------------------------|-----------|-------|----------------------------------------------------------------------------------------------------------------------------------------------------------------------------------------------------------------------------------------------------------------------------------------------------|--------------------------------------------------------------------------------------|
|      |       |                                                  |           |       | 945.5387[M-H-Xyl-Ara-Glc] <sup>-</sup> ,<br>783.4902[M-H-Xyl-Ara-2Glc] <sup>-</sup> ,<br>621.4384[M-H-Xyl-Ara-3Glc] <sup>-</sup> ,<br>459.3811[M-H-Xyl-Ara-4Glc] <sup>-</sup>                                                                                                                      |                                                                                      |
| R209 | 16.83 | C <sub>61</sub> H <sub>100</sub> O <sub>29</sub> | 1295.6267 | -0.39 | 1209.6281[M-H-Malonyl] <sup>-</sup> ,<br>1077.5908 [M-H-Malonyl-Xyl] <sup>-</sup> ,<br>945.5458[M-H-Malonyl-Xyl-Ara] <sup>-</sup> ,<br>783.4890[M-H-Malonyl-Xyl-Ara-Glc] <sup>-</sup> ,<br>621.4402[M-H-Malonyl-Xyl-Ara-2Glc]<br><sup>-</sup> ,<br>459.3851[M-H-Malonyl-Xyl-Ara-3Glc] <sup>-</sup> | Malonyl-ginsenosid<br>e Ra <sub>1</sub> /<br>Malonyl-ginsenosid<br>e Ra <sub>2</sub> |
| R210 | 16.88 | C <sub>42</sub> H <sub>72</sub> O <sub>13</sub>  | 783.4908  | 1.66  | 475.3784[M-H-Rha-Glc] <sup>-</sup>                                                                                                                                                                                                                                                                 | Ginsenoside Rg <sub>2</sub><br>isomer                                                |
| R211 | 16.88 | C <sub>62</sub> H <sub>102</sub> O <sub>30</sub> | 1325.6356 | -1.66 | 1239.6378[M-H-Malonyl] <sup>-</sup> ,<br>1107.5924[M-H-Malonyl-Xyl] <sup>-</sup> ,<br>945.5419[M-H-Malonyl-Xyl-Glc] <sup>-</sup> ,<br>783.4904[M-H-Malonyl-Xyl-2Glc] <sup>-</sup> ,<br>621.4343[M-H-Malonyl-Xyl-3Glc] <sup>-</sup> ,<br>459.3821[M-H-Malonyl-Xyl-4Glc] <sup>-</sup>                | Malonyl-notoginsen<br>oside R <sub>4</sub>                                           |
| R212 | 16.91 | C <sub>61</sub> H <sub>100</sub> O <sub>29</sub> | 1295.6267 | -0.39 | 1209.6287[M-H-Malonyl] <sup>-</sup> ,<br>1077.5913[M-H-Malonyl-Xyl] <sup>-</sup> ,<br>945.5440[M-H-Malonyl-Xyl-Ara] <sup>-</sup> ,<br>783.4888[M-H-Malonyl-Xyl-Ara-Glc] <sup>-</sup> ,<br>621.4340[M-H-Malonyl-Xyl-Ara-2Glc]<br><sup>-</sup> ,<br>459.3855[M-H-Malonyl-Xyl-Ara-3Glc] <sup>-</sup>  | Malonyl-ginsenosid<br>e Ra <sub>1</sub> /<br>Malonyl-ginsenosid<br>e Ra <sub>2</sub> |
| R213 | 16.97 | C <sub>42</sub> H <sub>72</sub> O <sub>13</sub>  | 783.4907  | 1.53  | 475.3777[M-H-Rha-Glc] <sup>-</sup>                                                                                                                                                                                                                                                                 | Ginsenoside Rg <sub>2</sub><br>isomer                                                |

|      |       |                                                  |           |       |                                                                                                                                                                                                                                                                                                                                                                                                                                                                                                                          |                                                                                  |
|------|-------|--------------------------------------------------|-----------|-------|--------------------------------------------------------------------------------------------------------------------------------------------------------------------------------------------------------------------------------------------------------------------------------------------------------------------------------------------------------------------------------------------------------------------------------------------------------------------------------------------------------------------------|----------------------------------------------------------------------------------|
| R214 | 16.98 | C <sub>59</sub> H <sub>100</sub> O <sub>27</sub> | 1239.6382 | 0.65  | 1107.5958[M-H-Glc] <sup>-</sup> ,<br>945.5446[M-H-Glc-Xyl] <sup>-</sup> ,<br>783.4906[M-H-2Glc-Xyl] <sup>-</sup> ,<br>621.4390[M-H-3Glc-Xyl] <sup>-</sup> ,<br>459.3846[M-H-4Glc-Xyl] <sup>-</sup>                                                                                                                                                                                                                                                                                                                       | Notoginsenoside R <sub>4</sub><br>isomer/Ginsenoside<br>Ra <sub>3</sub> isomer   |
| R215 | 17.08 | C <sub>61</sub> H <sub>102</sub> O <sub>28</sub> | 1281.6471 | -0.62 | 1239.6389[M-H-Ac] <sup>-</sup> ,<br>1107.5958[M-H-Ac-Xyl/Ara] <sup>-</sup> ,<br>945.5429[M-H-Ac-Xyl/Ara-Glc] <sup>-</sup> ,<br>783.4897[M-H-Ac-Xyl/Ara-2Glc] <sup>-</sup> ,<br>621.4372[M-H-Ac-Xyl/Ara-3Glc] <sup>-</sup> ,<br>459.3835[M-H-Ac-Xyl/Ara-4Glc] <sup>-</sup>                                                                                                                                                                                                                                                | Acetyl-ginsenoside<br>Ra <sub>3</sub> /Acetyl-notogins<br>enoside R <sub>4</sub> |
| R216 | 17.17 | C <sub>41</sub> H <sub>70</sub> O <sub>13</sub>  | 769.4741  | 0.39  | 637.4324[M-H-Xyl] <sup>-</sup> ,<br>475.3792[M-H-Xyl-Glc] <sup>-</sup>                                                                                                                                                                                                                                                                                                                                                                                                                                                   | Notoginsenoside R <sub>2</sub><br><i>a</i>                                       |
| R217 | 17.18 | C <sub>51</sub> H <sub>84</sub> O <sub>22</sub>  | 1047.5367 | -0.86 | 961.5367[M-H-Malonyl] <sup>-</sup> ,<br>799.4769[M-H-Malonyl-Glc] <sup>-</sup> ,<br>637.4283[M-H-Malonyl-2Glc] <sup>-</sup> ,<br>475.3801[M-H-Malonyl-3Glc] <sup>-</sup>                                                                                                                                                                                                                                                                                                                                                 | Malonyl-vina-ginse<br>noside R <sub>4</sub> isomer                               |
| R218 | 17.18 | C <sub>65</sub> H <sub>108</sub> O <sub>31</sub> | 1383.6803 | 0.51  | 1341.6703[M-H-Ac] <sup>-</sup> ,<br>1323.6552[M-H-Ac-H <sub>2</sub> O] <sup>-</sup> ,<br>1209.6250[M-H-Ac-Xyl] <sup>-</sup> ,<br>1191.6195[M-H-Ac-Xyl-H <sub>2</sub> O] <sup>-</sup> ,<br>1077.5776[M-H-Ac-Xyl-Ara] <sup>-</sup> ,<br>1059.5737[M-H-Ac-Xyl-Ara-H <sub>2</sub> O] <sup>-</sup> ,<br>945.5395[M-H-Ac-Xyl-Ara-Xyl/Ara] <sup>-</sup> ,<br>783.48555[M-H-Ac-Xyl-Ara-Xyl/Ara-Glc] <sup>-</sup> ,<br>621.4359[M-H-Ac-Xyl-Ara-Xyl/Ara-2Glc] <sup>-</sup> ,<br>459.3844[M-H-Ac-Xyl-Ara-Xyl/Ara-3Glc] <sup>-</sup> | Protopanaxadiol+X<br>yl+Ara+Xyl/Ara+3G<br>lc+Acetyl                              |

|      |       |                                                  |                       |       | lc <sup>-</sup>                                                                                                                                                                                                                                                                                                                |                                                   |
|------|-------|--------------------------------------------------|-----------------------|-------|--------------------------------------------------------------------------------------------------------------------------------------------------------------------------------------------------------------------------------------------------------------------------------------------------------------------------------|---------------------------------------------------|
| R219 | 17.21 | C <sub>60</sub> H <sub>102</sub> O <sub>28</sub> | 1269.6471             | -0.63 | 1107.5922[M-H-Glc] <sup>-</sup> ,<br>945.5416[M-H-2Glc] <sup>-</sup> ,<br>783.4902[M-H-3Glc] <sup>-</sup> ,<br>621.4380[M-H-4Glc] <sup>-</sup> ,<br>459.3835[M-H-5Glc] <sup>-</sup>                                                                                                                                            | Protopanaxadiol+5<br>Glc                          |
| R220 | 17.21 | C <sub>56</sub> H <sub>92</sub> O <sub>26</sub>  | 1179.5784             | -1.19 | 1093.5788[M-H-Malonyl] <sup>-</sup> ,<br>961.5355[M-H-Malonyl-Ara/Xyl] <sup>-</sup> ,<br>799.4799[M-H-Malonyl-Ara/Xyl-Glc] <sup>-</sup> ,<br>637.4306[M-H-Malonyl-Ara/Xyl-2Glc] <sup>-</sup> ,<br>,<br>475.3744[M-H-Malonyl-Ara/Xyl-3Glc] <sup>-</sup>                                                                         | Protopanaxatriol+<br>Ara/Xyl+2Glc+<br>Malonyl Glc |
| R221 | 17.21 | C <sub>53</sub> H <sub>84</sub> O <sub>23</sub>  | 1087.5337             | 1.10  | 793.4382[M-H-Glc-Xyl/Ara] <sup>-</sup> ,<br>731.4387[M-H-Glc-Xyl/Ara-CO <sub>2</sub> -H <sub>2</sub> O] <sup>-</sup> ,<br>613.3707[M-H-Glc-Xyl/Ara-Glc-H <sub>2</sub> O] <sup>-</sup> ,<br>569.3850[M-H-Glc-Xyl/Ara-Glc-H <sub>2</sub> O-C<br>O <sub>2</sub> ] <sup>-</sup> ,<br>455.3531[M-H-2Glc-Xyl/Ara-Glu A] <sup>-</sup> | Oleanolic<br>aglycone+2Glc+Xyl/<br>Ara+Glu A      |
| R222 | 17.23 | C <sub>44</sub> H <sub>74</sub> O <sub>15</sub>  | 841.4945              | 0.91  | 799.4879[M-H-Ac] <sup>-</sup> ,<br>637.4313[M-H-Ac-Glc] <sup>-</sup> ,<br>475.3795[M-H-Ac-2Glc] <sup>-</sup>                                                                                                                                                                                                                   | Yesaninoside D                                    |
| R223 | 17.25 | C <sub>57</sub> H <sub>94</sub> O <sub>26</sub>  | 1193.5932             | -1.93 | 1107.5909[M-H-Malonyl] <sup>-</sup> ,<br>945.5381[M-H-Malonyl-Glc] <sup>-</sup> ,<br>783.4945[M-H-Malonyl-2Glc] <sup>-</sup> ,<br>621.4410[M-H-Malonyl-3Glc] <sup>-</sup> ,<br>459.3853[M-H-Malonyl-4Glc] <sup>-</sup>                                                                                                         | Malonyl-ginsenosid<br>e Rb <sub>1</sub> isomer    |
| R224 | 17.27 | C <sub>42</sub> H <sub>70</sub> O <sub>15</sub>  | 859.4685 <sup>b</sup> | -0.70 | 813.4393[M-H] <sup>-</sup> ,<br>769.4633[M-H-CO <sub>2</sub> ] <sup>-</sup> ,<br>637.4297[M-H-Glu A] <sup>-</sup> ,<br>475.3783[M-H-Glu A-Glc] <sup>-</sup>                                                                                                                                                                    | Protopanaxatriol+Gl<br>u A+Glc                    |
| R225 | 17.28 | C <sub>59</sub> H <sub>100</sub> O <sub>27</sub> | 1239.6375             | 0.08  | 1107.5924[M-H-Glc] <sup>-</sup> ,                                                                                                                                                                                                                                                                                              | Notoginsenoside R <sub>4</sub>                    |



|      |       |                                                  |           |       |                                                                                                                                                                                                                                                                                     |                                                                                                     |
|------|-------|--------------------------------------------------|-----------|-------|-------------------------------------------------------------------------------------------------------------------------------------------------------------------------------------------------------------------------------------------------------------------------------------|-----------------------------------------------------------------------------------------------------|
|      |       |                                                  |           |       | 945.5419[M-H-Glc-Xyl] <sup>-</sup> ,<br>783.4904[M-H-2Glc-Xyl] <sup>-</sup> ,<br>621.4343[M-H-3Glc-Xyl] <sup>-</sup> ,<br>459.3804[M-H-4Glc-Xyl] <sup>-</sup>                                                                                                                       | isomer/Ginsenoside<br>Ra <sub>3</sub> isomer                                                        |
| R226 | 17.28 | C <sub>43</sub> H <sub>68</sub> O <sub>14</sub>  | 807.4534  | 0.37  | 765.4423[M-H-Ac] <sup>-</sup> ,<br>603.3893[M-H-Ac-Glc] <sup>-</sup> ,<br>441.3388[M-H-Ac-2Glc] <sup>-</sup>                                                                                                                                                                        | Dehydrated-protop<br>anaxadiol+Acetyl<br>Glc+Glc                                                    |
| R227 | 17.33 | C <sub>62</sub> H <sub>102</sub> O <sub>30</sub> | 1325.6377 | -0.08 | 1239.6313[M-H-Malonyl] <sup>-</sup> ,<br>1107.5941[M-H-Malonyl-Xyl] <sup>-</sup> ,<br>945.5395[M-H-Malonyl-Xyl-Glc] <sup>-</sup> ,<br>783.4912[M-H-Malonyl-Xyl-2Glc] <sup>-</sup> ,<br>621.4358[M-H-Malonyl-Xyl-3Glc] <sup>-</sup> ,<br>459.3817[M-H-Malonyl-Xyl-4Glc] <sup>-</sup> | Malonyl-notoginsen<br>oside R <sub>4</sub><br>isomer/Malonyl-gin<br>senoside Ra <sub>3</sub> isomer |
| R228 | 17.34 | C <sub>45</sub> H <sub>74</sub> O <sub>17</sub>  | 885.4843  | -0.56 | 637.4288[M-H-Malonyl-Glc] <sup>-</sup> ,<br>475.3795[M-H-Malonyl-2Glc] <sup>-</sup>                                                                                                                                                                                                 | Malonyl-ginsenosid<br>e Ia                                                                          |
| R229 | 17.34 | C <sub>61</sub> H <sub>102</sub> O <sub>28</sub> | 1281.6484 | 0.39  | 1239.6371[M-H-Ac] <sup>-</sup> ,<br>1107.5908[M-H-Ac-Xyl/Ara] <sup>-</sup> ,<br>945.5460[M-H-Ac-Xyl/Ara-Glc] <sup>-</sup> ,<br>783.4949[M-H-Ac-Xyl/Ara-2Glc] <sup>-</sup> ,<br>621.4390[M-H-Ac-Xyl/Ara-3Glc] <sup>-</sup> ,<br>459.3823[M-H-Ac-Xyl/Ara-4Glc] <sup>-</sup>           | Acetyl-ginsenoside<br>Ra <sub>3</sub> /Acetyl-notogins<br>enoside R <sub>4</sub>                    |
| R230 | 17.38 | C <sub>41</sub> H <sub>70</sub> O <sub>13</sub>  | 769.4743  | 0.65  | 637.4335[M-H-Ara] <sup>-</sup> ,<br>475.3577[M-H-Ara-Glc] <sup>-</sup>                                                                                                                                                                                                              | Ginsenoside<br>F <sub>3</sub> /Ginsenoside F <sub>5</sub>                                           |
| R231 | 17.38 | C <sub>54</sub> H <sub>90</sub> O <sub>23</sub>  | 1105.5796 | 0.09  | 943.5290[M-H-Glc] <sup>-</sup> ,<br>781.4714[M-H-2Glc] <sup>-</sup> ,<br>619.4185[M-H-3Glc] <sup>-</sup> ,<br>457.3685[M-H-4Glc] <sup>-</sup>                                                                                                                                       | Dehydrated-protop<br>anaxatriol+4Glc                                                                |
| R232 | 17.40 | C <sub>42</sub> H <sub>72</sub> O <sub>14</sub>  | 799.4845  | 0.13  | 637.4327[M-H-Glc] <sup>-</sup>                                                                                                                                                                                                                                                      | Ginsenoside Rf                                                                                      |

|      |       |                                                  |           |       |                                                                                                                                                                                                                                                                                      |                                                                                |
|------|-------|--------------------------------------------------|-----------|-------|--------------------------------------------------------------------------------------------------------------------------------------------------------------------------------------------------------------------------------------------------------------------------------------|--------------------------------------------------------------------------------|
|      |       |                                                  |           |       | 475.3800[M-H-2Glc] <sup>-</sup>                                                                                                                                                                                                                                                      | isomer                                                                         |
| R233 | 17.41 | C <sub>60</sub> H <sub>100</sub> O <sub>27</sub> | 1251.6364 | -0.80 | 1077.5898[M-H-Ac-Xyl] <sup>-</sup> ,<br>945.5436[M-H-Ac-Xyl-ara(p)] <sup>-</sup> ,<br>783.4938[M-H-Ac-Xyl- ara(p)-Glc] <sup>-</sup> ,<br>621.4387[M-H-Ac-Xyl- ara(p)-2Glc] <sup>-</sup> ,<br>459.3845[M-H-Ac-Xyl- ara(p)-3Glc] <sup>-</sup>                                          | Ginsenoside Ra <sub>5</sub><br>isomer                                          |
| R234 | 17.42 | C <sub>58</sub> H <sub>98</sub> O <sub>26</sub>  | 1209.6272 | 0.33  | 1077.5869[M-H-Xyl] <sup>-</sup> ,<br>945.5433[M-H-Xyl-Ara] <sup>-</sup> ,<br>783.4961[M-H-Xyl-Ara-Glc] <sup>-</sup> ,<br>621.4344[M-H-Xyl-Ara-2Glc] <sup>-</sup> ,<br>459.3845[M-H-Xyl-Ara-3Glc] <sup>-</sup>                                                                        | Ginsenoside Ra <sub>1</sub><br>isomer/Ginsenoside<br>Ra <sub>2</sub> isomer    |
| R235 | 17.45 | C <sub>56</sub> H <sub>94</sub> O <sub>24</sub>  | 1149.6029 | -2.44 | 1107.5918[M-H-Ac] <sup>-</sup> ,<br>945.5482 [M-H-Ac-Glc] <sup>-</sup> ,<br>783.4918[M-H-Ac-2Glc] <sup>-</sup> ,<br>621.4401[M-H-Ac-3Glc] <sup>-</sup> ,<br>459.3868[M-H-Ac-4Glc] <sup>-</sup>                                                                                       | Quinquenoside R <sub>1</sub><br>isomer                                         |
| R236 | 17.48 | C <sub>59</sub> H <sub>100</sub> O <sub>27</sub> | 1239.6377 | 0.24  | 1107.5844[M-H-Glc] <sup>-</sup> ,<br>945.5328[M-H-Glc-Xyl] <sup>-</sup> ,<br>783.4883[M-H-2Glc-Xyl] <sup>-</sup> ,<br>621.4341[M-H-3Glc-Xyl] <sup>-</sup> ,<br>459.3811[M-H-4Glc-Xyl] <sup>-</sup>                                                                                   | Notoginsenoside R <sub>4</sub><br>isomer/Ginsenoside<br>Ra <sub>3</sub> isomer |
| R237 | 17.49 | C <sub>41</sub> H <sub>70</sub> O <sub>13</sub>  | 769.4753  | 1.95  | 637.4319[M-H-Ara] <sup>-</sup> ,<br>475.3796[M-H-Ara-Glc] <sup>-</sup>                                                                                                                                                                                                               | Ginsenoside<br>F <sub>3</sub> /Ginsenoside F <sub>5</sub>                      |
| R238 | 17.50 | C <sub>59</sub> H <sub>98</sub> O <sub>27</sub>  | 1237.6221 | 0.32  | 1105.5785[M-H-Xyl/Ara] <sup>-</sup> ,<br>943.5281[M-H-Xyl/Ara-Glc] <sup>-</sup> ,<br>781.4758[M-H-Xyl/Ara-2Glc] <sup>-</sup> ,<br>763.4532[M-H-Xyl/Ara-2Glc-H <sub>2</sub> O] <sup>-</sup> ,<br>619.4229[M-H-Xyl/Ara-3Glc] <sup>-</sup> ,<br>457.3721[M-H-Xyl/Ara-4Glc] <sup>-</sup> | Dehydrated-protop<br>anaxatriol+Xyl/Ara<br>+4Glc                               |
| R239 | 17.52 | C <sub>44</sub> H <sub>74</sub> O <sub>15</sub>  | 841.4941  | 0.39  | 799.4834[M-H-Ac] <sup>-</sup> ,<br>637.4296[M-H-Ac-Glc] <sup>-</sup>                                                                                                                                                                                                                 | Yesanchinoside D<br>isomer                                                     |

|      |       |                                                  |           |       |                                                                                                                                                                                                                                                                                     |                                                                                                     |
|------|-------|--------------------------------------------------|-----------|-------|-------------------------------------------------------------------------------------------------------------------------------------------------------------------------------------------------------------------------------------------------------------------------------------|-----------------------------------------------------------------------------------------------------|
|      |       |                                                  |           |       | 475.3789[M-H-Ac-2Glc] <sup>-</sup>                                                                                                                                                                                                                                                  |                                                                                                     |
| R240 | 17.52 | C <sub>48</sub> H <sub>76</sub> O <sub>19</sub>  | 955.4905  | 0.21  | 793.4385[M-H-Glc] <sup>-</sup> ,<br>731.4379[M-H-Glc-CO <sub>2</sub> -H <sub>2</sub> O] <sup>-</sup> ,<br>569.3853[M-H-2Glc-H <sub>2</sub> O-CO <sub>2</sub> ] <sup>-</sup> ,<br>455.3515[M-H-2Glc-Glu A] <sup>-</sup>                                                              | Ginsenoside Ro<br>isomer                                                                            |
| R241 | 17.55 | C <sub>50</sub> H <sub>82</sub> O <sub>20</sub>  | 1001.5337 | 1.60  | 959.5232[M-H-Ac] <sup>-</sup> ,<br>797.4665[M-H-Ac-Glc] <sup>-</sup> ,<br>635.4185[M-H-Ac-2Glc] <sup>-</sup> ,<br>473.3651[M-H-Ac-3Glc] <sup>-</sup>                                                                                                                                | Dehydrogenated-pr<br>otopanaxatriol+2Glc<br>+Acetyl Glc                                             |
| R242 | 17.59 | C <sub>56</sub> H <sub>94</sub> O <sub>24</sub>  | 1149.6071 | 1.22  | 945.5449 [M-H-Ac-Glc] <sup>-</sup> ,<br>783.4938[M-H-Ac-2Glc] <sup>-</sup> ,<br>621.4384[M-H-Ac-3Glc] <sup>-</sup> ,<br>459.3892[M-H-Ac-4Glc] <sup>-</sup>                                                                                                                          | Quinquenoside R <sub>1</sub><br>isomer                                                              |
| R243 | 17.60 | C <sub>42</sub> H <sub>72</sub> O <sub>14</sub>  | 799.4840  | -0.50 | 637.4350[M-H-Glc] <sup>-</sup> ,<br>475.3799[M-H-2Glc] <sup>-</sup>                                                                                                                                                                                                                 | Ginsenoside Rf<br>isomer                                                                            |
| R244 | 17.61 | C <sub>62</sub> H <sub>102</sub> O <sub>30</sub> | 1325.6378 | 0.00  | 1239.6312[M-H-Malonyl] <sup>-</sup> ,<br>1107.5948[M-H-Malonyl-Xyl] <sup>-</sup> ,<br>945.5328[M-H-Malonyl-Xyl-Glc] <sup>-</sup> ,<br>783.4883[M-H-Malonyl-Xyl-2Glc] <sup>-</sup> ,<br>621.4341[M-H-Malonyl-Xyl-3Glc] <sup>-</sup> ,<br>459.3831[M-H-Malonyl-Xyl-4Glc] <sup>-</sup> | Malonyl-notoginsen<br>oside R <sub>4</sub><br>isomer/Malonyl-gin<br>senoside R <sub>a3</sub> isomer |
| R245 | 17.62 | C <sub>60</sub> H <sub>102</sub> O <sub>28</sub> | 1269.6476 | -0.24 | 1107.6014[M-H-Glc] <sup>-</sup> ,<br>945.5500[M-H-2Glc] <sup>-</sup> ,<br>783.4929[M-H-3Glc] <sup>-</sup> ,<br>621.4399[M-H-4Glc] <sup>-</sup> ,<br>459.3786[M-H-5Glc] <sup>-</sup>                                                                                                 | Protopanaxadiol+5<br>Glc                                                                            |
| R246 | 17.64 | C <sub>41</sub> H <sub>68</sub> O <sub>13</sub>  | 767.4588  | 0.78  | 635.4172[M-H-Xyl/Ara] <sup>-</sup> ,<br>473.3636[M-H-Xyl/Ara-Glc] <sup>-</sup>                                                                                                                                                                                                      | Dehydrogenated-pr<br>otopanaxatriol+<br>Xyl/Ara+Glc                                                 |
| R247 | 17.68 | C <sub>51</sub> H <sub>84</sub> O <sub>22</sub>  | 1047.5367 | -0.86 | 799.4898[M-H-Malonyl-Glc] <sup>-</sup>                                                                                                                                                                                                                                              | Malonyl-vina-ginse                                                                                  |

|      |       |                                                  |           |       |                                                                                                                                                                                              |                                                                                      |
|------|-------|--------------------------------------------------|-----------|-------|----------------------------------------------------------------------------------------------------------------------------------------------------------------------------------------------|--------------------------------------------------------------------------------------|
|      |       |                                                  |           |       | 637.4297[M-H-Malonyl-2Glc]⁻,                                                                                                                                                                 | noside R <sub>4</sub> isomer                                                         |
|      |       |                                                  |           |       | 475.3849 [M-H-Malonyl-3Glc]⁻                                                                                                                                                                 |                                                                                      |
| R248 | 17.69 | C <sub>58</sub> H <sub>98</sub> O <sub>26</sub>  | 1209.6262 | -0.50 | 1077.5844[M-H-Xyl]⁻,<br>945.5457[M-H-Xyl-Ara(f)]⁻,<br>783.4891[M-H-Xyl-Ara(f)-Glc]⁻,<br>621.4388[M-H-Xyl-Ara(f)-2Glc]⁻,<br>459.3869[M-H-Xyl-Ara(f)-3Glc]⁻                                    | Ginsenoside Ra <sub>2</sub> <sup>a</sup>                                             |
| R249 | 17.70 | C <sub>60</sub> H <sub>102</sub> O <sub>28</sub> | 1269.6465 | -1.10 | 1107.5936[M-H-Glc]⁻,<br>945.5430[M-H-2Glc]⁻,<br>783.4886[M-H-3Glc]⁻,<br>621.4363[M-H-4Glc]⁻,<br>459.3849[M-H-5Glc]⁻                                                                          | Protopanaxadiol+5<br>Glc                                                             |
| R250 | 17.70 | C <sub>61</sub> H <sub>102</sub> O <sub>28</sub> | 1281.6488 | 0.70  | 1239.6315[M-H-Ac]⁻,<br>1107.5852[M-H-Ac-Xyl/Ara]⁻,<br>945.5457[M-H-Ac-Xyl/Ara-Glc]⁻,<br>783.4911[M-H-Ac-Xyl/Ara-2Glc]⁻,<br>621.4362[M-H-Ac-Xyl/Ara-3Glc]⁻,<br>459.3851[M-H-Ac-Xyl/Ara-4Glc]⁻ | Acetyl-ginsenoside<br>Ra <sub>3</sub> /Acetyl-notogins<br>enoside R <sub>4</sub>     |
| R251 | 17.72 | C <sub>64</sub> H <sub>108</sub> O <sub>31</sub> | 1371.6782 | -1.02 | 1239.6383[M-H-Xyl]⁻,<br>1107.5880[M-H-Xyl-Ara]⁻,<br>945.5468[M-H-Xyl-Ara-Glc]⁻,<br>783.4961[M-H-Xyl-Ara-2Glc]⁻,<br>621.4357[M-H-Xyl-Ara-3Glc]⁻,<br>459.3835[M-H-Xyl-Ara-4Glc]⁻               | Protopanaxadiol+X<br>yl+Ara+4Glc                                                     |
| R252 | 17.76 | C <sub>61</sub> H <sub>100</sub> O <sub>29</sub> | 1295.6267 | -0.39 | 1077.5815[M-H-Malonyl-Xyl]⁻,<br>945.5440[M-H-Malonyl-Xyl-Ara]⁻,<br>783.4857[M-H-Malonyl-Xyl-Ara-Glc]⁻,<br>621.4341[M-H-Malonyl-Xyl-Ara-2Glc]                                                 | Malonyl-ginsenosid<br>e Ra <sub>1</sub> /<br>Malonyl-ginsenosid<br>e Ra <sub>2</sub> |

---

459.3857[M-H-Malonyl-Xyl-Ara-3Glc]<sup>-</sup>

|      |       |                                                  |           |       |                                                                                                                                                                                                                                                                                     |                                                                                                     |
|------|-------|--------------------------------------------------|-----------|-------|-------------------------------------------------------------------------------------------------------------------------------------------------------------------------------------------------------------------------------------------------------------------------------------|-----------------------------------------------------------------------------------------------------|
| R253 | 17.77 | C <sub>48</sub> H <sub>76</sub> O <sub>19</sub>  | 955.4910  | 0.73  | 793.4365[M-H-Glc] <sup>-</sup> ,<br>731.4373[M-H-Glc-CO <sub>2</sub> -H <sub>2</sub> O] <sup>-</sup> ,<br>613.3727[M-H-2Glc-H <sub>2</sub> O] <sup>-</sup> ,<br>569.3859[M-H-2Glc-H <sub>2</sub> O-CO <sub>2</sub> ] <sup>-</sup> ,<br>455.3513[M-H-2Glc-Glu A] <sup>-</sup>        | Ginsenoside Ro<br>isomer                                                                            |
| R254 | 17.78 | C <sub>61</sub> H <sub>102</sub> O <sub>28</sub> | 1281.6470 | -0.70 | 1239.6387[M-H-Ac] <sup>-</sup> ,<br>1107.5953[M-H-Ac-Xyl/Ara] <sup>-</sup> ,<br>945.5441[M-H-Ac-Xyl/Ara-Glc] <sup>-</sup> ,<br>783.4907[M-H-Ac-Xyl/Ara-2Glc] <sup>-</sup> ,<br>621.4378[M-H-Ac-Xyl/Ara-3Glc] <sup>-</sup> ,<br>459.3849[M-H-Ac-Xyl/Ara-4Glc] <sup>-</sup>           | Acetyl-ginsenoside<br>Ra <sub>3</sub> /Acetyl-notogins<br>enoside R <sub>4</sub>                    |
| R255 | 17.81 | C <sub>53</sub> H <sub>84</sub> O <sub>23</sub>  | 1087.5334 | 0.83  | 793.4398[M-H-Glc-Xyl/Ara] <sup>-</sup> ,<br>731.4387[M-H-Glc-Xyl/Ara-CO <sub>2</sub> -H <sub>2</sub> O] <sup>-</sup> ,<br>613.3809[M-H-Glc-Xyl/Ara-Glc-H <sub>2</sub> O] <sup>-</sup> ,<br>455.3527[M-H-2Glc-Xyl/Ara-Glu A] <sup>-</sup>                                            | Oleanolic<br>aglycone+2Glc+Xyl/<br>Ara+Glu A                                                        |
| R256 | 17.83 | C <sub>62</sub> H <sub>102</sub> O <sub>30</sub> | 1325.6378 | 0.00  | 1239.6409[M-H-Malonyl] <sup>-</sup> ,<br>1107.5947[M-H-Malonyl-Xyl] <sup>-</sup> ,<br>945.5432[M-H-Malonyl-Xyl-Glc] <sup>-</sup> ,<br>783.4896[M-H-Malonyl-Xyl-2Glc] <sup>-</sup> ,<br>621.4371[M-H-Malonyl-Xyl-3Glc] <sup>-</sup> ,<br>459.3842[M-H-Malonyl-Xyl-4Glc] <sup>-</sup> | Malonyl-notoginsen<br>oside R <sub>4</sub><br>isomer/Malonyl-gin<br>senoside Ra <sub>3</sub> isomer |
| R257 | 17.86 | C <sub>59</sub> H <sub>100</sub> O <sub>27</sub> | 1239.6375 | 0.08  | 1107.5947[M-H-Glc] <sup>-</sup> ,<br>945.5432[M-H-Glc-Xyl] <sup>-</sup> ,<br>783.4896[M-H-2Glc-Xyl] <sup>-</sup> ,<br>621.4371[M-H-3Glc-Xyl] <sup>-</sup> ,<br>459.3842[M-H-4Glc-Xyl] <sup>-</sup>                                                                                  | Ginsenoside Ra <sub>3</sub> <sup>a</sup>                                                            |
| R258 | 17.87 | C <sub>58</sub> H <sub>96</sub> O <sub>24</sub>  | 1175.6230 | 1.45  | 945.5481[M-H-(E)-but-2-enoyl-Glc] <sup>-</sup> ,<br>783.4847[M-H-(E)-but-2-enoyl-2Glc] <sup>-</sup>                                                                                                                                                                                 | Ginsenoside Ra <sub>6</sub><br>isomer                                                               |

---

|      |       |                                                 |           |       |                                                                                                                                                                                                                                                                                                                                                                                                                                                                     |                                                            |
|------|-------|-------------------------------------------------|-----------|-------|---------------------------------------------------------------------------------------------------------------------------------------------------------------------------------------------------------------------------------------------------------------------------------------------------------------------------------------------------------------------------------------------------------------------------------------------------------------------|------------------------------------------------------------|
|      |       |                                                 |           |       | 621.4365[M-H-( <i>E</i> )-but-2-enoyl-3Glc] <sup>+</sup> ,<br>459.3833[M-H-( <i>E</i> )-but-2-enoyl-4Glc] <sup>+</sup>                                                                                                                                                                                                                                                                                                                                              |                                                            |
| R259 | 17.90 | C <sub>54</sub> H <sub>92</sub> O <sub>23</sub> | 1107.5953 | 0.18  | 945.5349[M-H-Glc] <sup>+</sup> ,<br>783.4890[M-H-2Glc] <sup>+</sup> ,<br>621.4276[M-H-3Glc] <sup>+</sup> ,<br>459.3860[M-H-4Glc] <sup>+</sup>                                                                                                                                                                                                                                                                                                                       | Ginsenoside Rb <sub>1</sub> <sup>a</sup>                   |
| R260 | 17.94 | C <sub>52</sub> H <sub>80</sub> O <sub>20</sub> | 1023.5168 | 0.29  | 955.4902[M-H-( <i>E</i> )-but-2-enoyl] <sup>+</sup> ,<br>793.4432[M-H-( <i>E</i> )-but-2-enoyl-Glc] <sup>+</sup> ,<br>731.4376[M-H-( <i>E</i> )-but-2-enoyl-Glc-CO<br>2-H <sub>2</sub> O] <sup>+</sup> ,<br>613.3828[M-H-( <i>E</i> )-but-2-enoyl-2Glc-H <sub>2</sub><br>O] <sup>+</sup> ,<br>569.3899[M-H-( <i>E</i> )-but-2-enoyl-2Glc-H <sub>2</sub><br>O-CO <sub>2</sub> ] <sup>+</sup> ,<br>455.3538[M-H-( <i>E</i> )-but-2-enoyl-2Glc-Gl<br>u A] <sup>+</sup> | ( <i>E</i> )-But-2-enoyl<br>ginsenoside Ro                 |
| R261 | 17.96 | C <sub>42</sub> H <sub>72</sub> O <sub>13</sub> | 783.4894  | -0.13 | 637.4330[M-H-Rha] <sup>+</sup> ,<br>475.3798[M-H-Rha-Glc] <sup>+</sup>                                                                                                                                                                                                                                                                                                                                                                                              | Ginsenoside<br>20( <i>S</i> )-Rg <sub>2</sub> <sup>a</sup> |
| R262 | 17.96 | C <sub>56</sub> H <sub>92</sub> O <sub>24</sub> | 1147.5891 | -0.78 | 1105.5797[M-H-Ac] <sup>+</sup> ,<br>943.5302[M-H-Ac-Glc] <sup>+</sup> ,<br>781.4748[M-H-Ac-2Glc] <sup>+</sup> ,<br>619.4218[M-H-Ac-3Glc] <sup>+</sup> ,<br>457.3690[M-H-Ac-4Glc] <sup>+</sup>                                                                                                                                                                                                                                                                       | Dehydrated-protop<br>anaxatriol+Acetyl<br>Glc+3Glc         |
| R263 | 17.98 | C <sub>36</sub> H <sub>62</sub> O <sub>9</sub>  | 637.4315  | -0.16 | 475.3785[M-H-Glc] <sup>+</sup>                                                                                                                                                                                                                                                                                                                                                                                                                                      | Ginsenoside<br>20( <i>S</i> )-Rh <sub>1</sub> <sup>a</sup> |
| R264 | 17.99 | C <sub>44</sub> H <sub>74</sub> O <sub>15</sub> | 841.4949  | 1.43  | 799.4871[M-H-Ac] <sup>+</sup> ,<br>637.4312[M-H-Ac-Glc] <sup>+</sup> ,<br>475.3795[M-H-Ac-2Glc] <sup>+</sup>                                                                                                                                                                                                                                                                                                                                                        | Yesanchinoside D<br>isomer                                 |
| R265 | 17.99 | C <sub>48</sub> H <sub>76</sub> O <sub>19</sub> | 955.4911  | 0.84  | 793.4365[M-H-Glc] <sup>+</sup> ,<br>731.4370[M-H-Glc-CO <sub>2</sub> -H <sub>2</sub> O] <sup>+</sup>                                                                                                                                                                                                                                                                                                                                                                | Ginsenoside Ro<br>isomer                                   |

|      |       |                                                  |                       |       |                                                                     |                             |
|------|-------|--------------------------------------------------|-----------------------|-------|---------------------------------------------------------------------|-----------------------------|
|      |       |                                                  |                       |       | 613.3737[M-H-2Glc-H <sub>2</sub> O] <sup>-</sup> ,                  |                             |
|      |       |                                                  |                       |       | 569.3853[M-H-2Glc-H <sub>2</sub> O-CO <sub>2</sub> ] <sup>-</sup> , |                             |
|      |       |                                                  |                       |       | 455.3526[M-H-2Glc-Glu A] <sup>-</sup>                               |                             |
| R266 | 17.99 | C <sub>43</sub> H <sub>72</sub> O <sub>14</sub>  | 857.4907 <sup>b</sup> | 0.93  | 769.4741[M-H-Ac] <sup>-</sup> ,                                     | Protopanaxatriol+           |
|      |       |                                                  |                       |       | 637.4314[M-H-Ac-Xyl/Ara] <sup>-</sup> ,                             | Xyl/Ara+Acetyl Glc          |
|      |       |                                                  |                       |       | 475.3787[M-H-Ac-Xyl/Ara-Glc] <sup>-</sup>                           |                             |
| R267 | 18.00 | C <sub>56</sub> H <sub>92</sub> O <sub>25</sub>  | 1163.5829             | -1.72 | 1077.5968[M-H-Malonyl] <sup>-</sup> ,                               | Malonyl-ginsenosid          |
|      |       |                                                  |                       |       | 945.5432[M-H-Malonyl-Ara(f)] <sup>-</sup> ,                         | e Rc/                       |
|      |       |                                                  |                       |       | 783.4899[M-H-Malonyl-Ara(f)-Glc] <sup>-</sup> ,                     | Malonyl-ginsenosid          |
|      |       |                                                  |                       |       | 621.4388[M-H-Malonyl-Ara(f)-2Glc] <sup>-</sup> ,                    | e Rb <sub>2</sub> /         |
|      |       |                                                  |                       |       | 459.3859[M-H-Malonyl-Ara(f)-3Glc] <sup>-</sup>                      | Malonyl-ginsenosid          |
|      |       |                                                  |                       |       |                                                                     | e Rb <sub>3</sub>           |
| R268 | 18.01 | C <sub>61</sub> H <sub>100</sub> O <sub>29</sub> | 1295.6254             | -1.39 | 1209.62268[M-H-Malonyl] <sup>-</sup> ,                              | Malonyl-ginsenosid          |
|      |       |                                                  |                       |       | 1077.5892[M-H-Malonyl-Xyl] <sup>-</sup> ,                           | e Ra <sub>1</sub> /         |
|      |       |                                                  |                       |       | 945.5394[M-H-Malonyl-Xyl-Ara] <sup>-</sup> ,                        | Malonyl-ginsenosid          |
|      |       |                                                  |                       |       | 783.4913[M-H-Malonyl-Xyl-Ara-Glc] <sup>-</sup> ,                    | e Ra <sub>2</sub>           |
|      |       |                                                  |                       |       | 621.4399[M-H-Malonyl-Xyl-Ara-2Glc] <sup>-</sup> ,                   |                             |
|      |       |                                                  |                       |       | 459.3857[M-H-Malonyl-Xyl-Ara-3Glc] <sup>-</sup>                     |                             |
| R269 | 18.03 | C <sub>60</sub> H <sub>96</sub> O <sub>29</sub>  | 1279.5951             | -0.63 | 1107.5962[M-H-2Malonyl] <sup>-</sup> ,                              | Di-malonyl-ginseno          |
|      |       |                                                  |                       |       | 945.5468[M-H-2Malonyl-Glc] <sup>-</sup> ,                           | side Rb <sub>1</sub> isomer |
|      |       |                                                  |                       |       | 783.4888[M-H-2Malonyl-2Glc] <sup>-</sup> ,                          |                             |
|      |       |                                                  |                       |       | 621.4373[M-H-2Malonyl-3Glc] <sup>-</sup> ,                          |                             |
|      |       |                                                  |                       |       | 459.3826[M-H-2Malonyl-4Glc] <sup>-</sup>                            |                             |
| R270 | 18.03 | C <sub>56</sub> H <sub>92</sub> O <sub>24</sub>  | 1147.5884             | -1.39 | 1105.58367[M-H-Ac] <sup>-</sup> ,                                   | Dehydrated-protop           |
|      |       |                                                  |                       |       | 943.5201[M-H-Ac-Glc] <sup>-</sup> ,                                 | anaxatriol+Acetyl           |
|      |       |                                                  |                       |       | 781.4744[M-H-Ac-2Glc] <sup>-</sup> ,                                | Glc+3Glc                    |
|      |       |                                                  |                       |       | 619.4216[M-H-Ac-3Glc] <sup>-</sup> ,                                |                             |
|      |       |                                                  |                       |       | 457.3681[M-H-Ac-4Glc] <sup>-</sup>                                  |                             |
| R271 | 18.04 | C <sub>58</sub> H <sub>98</sub> O <sub>26</sub>  | 1209.6265             | -0.25 | 1077.5844[M-H-Xyl] <sup>-</sup> ,                                   | Ginsenoside Ra <sub>1</sub> |

|      |       |                                                  |           |       |                                                                                                                                                                                                                                               |                                                                                                                     |
|------|-------|--------------------------------------------------|-----------|-------|-----------------------------------------------------------------------------------------------------------------------------------------------------------------------------------------------------------------------------------------------|---------------------------------------------------------------------------------------------------------------------|
|      |       |                                                  |           |       | 945.5478[M-H-Xyl-Ara] <sup>-</sup> ,<br>783.4885[M-H-Xyl-Ara-Glc] <sup>-</sup> ,<br>621.4399[M-H-Xyl-Ara-2Glc] <sup>-</sup> ,<br>459.3831[M-H-Xyl-Ara-3Glc] <sup>-</sup>                                                                      | isomer/Ginsenoside<br>Ra <sub>2</sub> isomer                                                                        |
| R271 | 18.08 | C <sub>59</sub> H <sub>100</sub> O <sub>27</sub> | 1239.6378 | 0.32  | 1107.5983[M-H-Glc] <sup>-</sup> ,<br>945.5456[M-H-Glc-Xyl] <sup>-</sup> ,<br>783.4915[M-H-2Glc-Xyl] <sup>-</sup> ,<br>621.4380[M-H-3Glc-Xyl] <sup>-</sup> ,<br>459.3831[M-H-4Glc-Xyl] <sup>-</sup>                                            | Notoginsenoside R <sub>4</sub><br>isomer/Ginsenoside<br>Ra <sub>3</sub> isomer                                      |
| R273 | 18.13 | C <sub>54</sub> H <sub>92</sub> O <sub>23</sub>  | 1107.5959 | 0..72 | 945.5441[M-H-Glc] <sup>-</sup> ,<br>783.4879[M-H-2Glc] <sup>-</sup> ,<br>621.4361[M-H-3Glc] <sup>-</sup> ,<br>459.3828[M-H-4Glc] <sup>-</sup>                                                                                                 | Ginsenoside Rb <sub>1</sub><br>isomer                                                                               |
| R274 | 18.15 | C <sub>56</sub> H <sub>92</sub> O <sub>25</sub>  | 1163.5840 | -0.77 | 1077.6033[M-H-Malonyl] <sup>-</sup> ,<br>945.5459[M-H-Malonyl-Ara(f)] <sup>-</sup> ,<br>783.4794[M-H-Malonyl-Ara(f)-Glc] <sup>-</sup> ,<br>621.4474[M-H-Malonyl-Ara(f)-2Glc] <sup>-</sup> ,<br>459.3839[M-H-Malonyl-Ara(f)-3Glc] <sup>-</sup> | Malonyl-ginsenosid<br>e Rc/<br>Malonyl-ginsenosid<br>e Rb <sub>2</sub> /<br>Malonyl-ginsenosid<br>e Rb <sub>3</sub> |
| R275 | 18.15 | C <sub>51</sub> H <sub>84</sub> O <sub>22</sub>  | 1047.5362 | -1.34 | 961.5318[M-H-Malonyl] <sup>-</sup> ,<br>799.4782[M-H-Malonyl-Glc] <sup>-</sup> ,<br>637.4335[M-H-Malonyl-2Glc] <sup>-</sup> ,<br>475.3820 [M-H-Malonyl-3Glc] <sup>-</sup>                                                                     | Malonyl-vina-ginse<br>noside R <sub>4</sub> isomer                                                                  |
| R276 | 18.16 | C <sub>60</sub> H <sub>100</sub> O <sub>27</sub> | 1251.6384 | 0.80  | 1077.5820[M-H-Ac-Xyl] <sup>-</sup> ,<br>945.5406[M-H-Ac-Xyl-ara(p)] <sup>-</sup> ,<br>783.4877[M-H-Ac-Xyl- ara(p)-Glc] <sup>-</sup> ,<br>621.4356[M-H-Ac-Xyl- ara(p)-2Glc] <sup>-</sup> ,<br>459.3829[M-H-Ac-Xyl- ara(p)-3Glc] <sup>-</sup>   | Ginsenoside Ra <sub>5</sub><br>isomer                                                                               |
| R277 | 18.18 | C <sub>62</sub> H <sub>102</sub> O <sub>30</sub> | 1325.6371 | -0.53 | 1239.6536[M-H-Malonyl] <sup>-</sup> ,<br>1107.5983[M-H-Malonyl-Xyl] <sup>-</sup> ,<br>945.5456[M-H-Malonyl-Xyl-Glc] <sup>-</sup>                                                                                                              | Malonyl-ginsenosid<br>e Ra <sub>3</sub>                                                                             |



|      |       |                                                  |                        |       |                                                                                                                                                                                                                        |                                                                                  |
|------|-------|--------------------------------------------------|------------------------|-------|------------------------------------------------------------------------------------------------------------------------------------------------------------------------------------------------------------------------|----------------------------------------------------------------------------------|
|      |       |                                                  |                        |       | 783.4915[M-H-Malonyl-Xyl-2Glc],<br>621.4380[M-H-Malonyl-Xyl-3Glc],<br>459.3831[M-H-Malonyl-Xyl-4Glc]                                                                                                                   |                                                                                  |
| R278 | 18.25 | C <sub>60</sub> H <sub>100</sub> O <sub>27</sub> | 1251.6353              | -1.68 | 1077.6005[M-H-Ac-Xyl],<br>945.5560[M-H-Ac-Xyl-ara(p)],<br>783.4991[M-H-Ac-Xyl- ara(p)-Glc],<br>621.4448[M-H-Ac-Xyl- ara(p)-2Glc],<br>459.3903[M-H-Ac-Xyl- ara(p)-3Glc]                                                 | Ginsenoside Ra <sub>5</sub><br>isomer                                            |
| R279 | 18.25 | C <sub>57</sub> H <sub>94</sub> O <sub>26</sub>  | 1193.5947              | -0.67 | 1107.5950[M-H-Malonyl],<br>945.5453[M-H-Malonyl-Glc],<br>783.4878[M-H-Malonyl-2Glc],<br>621.4369[M-H-Malonyl-3Glc],<br>459.3831[M-H-Malonyl-4Glc]                                                                      | Malonyl-ginsenosid<br>e Rb <sub>1</sub>                                          |
| R280 | 18.25 | C <sub>58</sub> H <sub>96</sub> O <sub>26</sub>  | 1207.6130              | 1.49  | 1075.5701[M-H-Xyl],<br>943.5261[M-H-Xyl-Ara],<br>781.4768[M-H-Xyl-Ara-Glc],<br>619.4244[M-H-Xyl-Ara-2Glc],<br>457.3690[M-H-Xyl-Ara-3Glc]                                                                               | Dehydrated-protop<br>anaxatriol+Xyl+Ara<br>+3Glc                                 |
| R281 | 18.29 | C <sub>42</sub> H <sub>72</sub> O <sub>13</sub>  | 783.4897               | 0.26  | 637.4318[M-H-Rha],<br>475.3785[M-H-Rha-Glc]                                                                                                                                                                            | Ginsenoside<br>20(R)-Rg <sub>2</sub> <sup>a</sup>                                |
| R282 | 18.29 | C <sub>50</sub> H <sub>78</sub> O <sub>20</sub>  | 1043.5052 <sup>b</sup> | -1.05 | 793.4557[M-H-Ac-Glc],<br>731.4312[M-H-Ac-Glc-CO <sub>2</sub> -H <sub>2</sub> O],<br>613.3776[M-H-Ac-2Glc-H <sub>2</sub> O],<br>569.3872[M-H-Ac-2Glc-H <sub>2</sub> O-CO <sub>2</sub> ],<br>455.3525[M-H-Ac-2Glc-Glu A] | Acetyl-ginsenoside<br>Ro                                                         |
| R283 | 18.29 | C <sub>61</sub> H <sub>102</sub> O <sub>28</sub> | 1281.6483              | 0.31  | 1239.6411[M-H-Ac],<br>1107.5958[M-H-Ac-Xyl/Ara],<br>945.5457[M-H-Ac-Xyl/Ara-Glc],<br>783.4905[M-H-Ac-Xyl/Ara-2Glc],                                                                                                    | Acetyl-ginsenoside<br>Ra <sub>3</sub> /Acetyl-notogins<br>enoside R <sub>4</sub> |

|      |       |                                                  |           |       |                                                                                                                                                                                                                                                                                      |                                                                                             |
|------|-------|--------------------------------------------------|-----------|-------|--------------------------------------------------------------------------------------------------------------------------------------------------------------------------------------------------------------------------------------------------------------------------------------|---------------------------------------------------------------------------------------------|
|      |       |                                                  |           |       | 621.4393[M-H-Ac-Xyl/Ara-3Glc] <sup>-</sup> ,<br>459.3840[M-H-Ac-Xyl/Ara-4Glc] <sup>-</sup>                                                                                                                                                                                           |                                                                                             |
| R284 | 18.39 | C <sub>62</sub> H <sub>102</sub> O <sub>30</sub> | 1325.6387 | 0.68  | 1239.6389[M-H-Malonyl] <sup>-</sup> ,<br>1107.59573[M-H-Malonyl-Xyl] <sup>-</sup> ,<br>945.5438[M-H-Malonyl-Xyl-Glc] <sup>-</sup> ,<br>783.4891[M-H-Malonyl-Xyl-2Glc] <sup>-</sup> ,<br>621.4385[M-H-Malonyl-Xyl-3Glc] <sup>-</sup> ,<br>459.3851[M-H-Malonyl-Xyl-4Glc] <sup>-</sup> | Malonyl-notoginsenoside R <sub>4</sub><br>isomer/Malonyl-ginsenoside R <sub>a3</sub> isomer |
| R285 | 18.46 | C <sub>53</sub> H <sub>90</sub> O <sub>22</sub>  | 1077.5856 | 1.02  | 945.5432[M-H-Ara(f)] <sup>-</sup> ,<br>783.4899[M-H-Ara(f)-Glc] <sup>-</sup> ,<br>621.4377[M-H-Ara(f)-2Glc] <sup>-</sup> ,<br>459.3862[M-H-Ara(f)-3Glc] <sup>-</sup>                                                                                                                 | Ginsenoside R <sub>c</sub> <sup>a</sup>                                                     |
| R286 | 18.48 | C <sub>36</sub> H <sub>62</sub> O <sub>9</sub>   | 637.4317  | 0.16  | 475.3794[M-H-Glc] <sup>-</sup>                                                                                                                                                                                                                                                       | Ginsenoside 20(R)-Rh <sub>1</sub> <sup>a</sup>                                              |
| R287 | 18.49 | C <sub>60</sub> H <sub>100</sub> O <sub>27</sub> | 1251.6374 | 0.00  | 1077.5972[M-H-Ac-Xyl] <sup>-</sup> ,<br>945.5435[M-H-Ac-Xyl-ara(p)] <sup>-</sup> ,<br>783.4909[M-H-Ac-Xyl- ara(p)-Glc] <sup>-</sup> ,<br>621.4369[M-H-Ac-Xyl- ara(p)-2Glc] <sup>-</sup> ,<br>459.3839[M-H-Ac-Xyl- ara(p)-3Glc] <sup>-</sup>                                          | Ginsenoside R <sub>a5</sub><br>isomer                                                       |
| R288 | 18.50 | C <sub>63</sub> H <sub>104</sub> O <sub>31</sub> | 1355.6470 | -0.96 | 1269.5906[M-H-Malonyl] <sup>-</sup> ,<br>1107.6016[M-H-Malonyl-Glc] <sup>-</sup> ,<br>945.5383[M-H-Malonyl-2Glc] <sup>-</sup> ,<br>783.4890[M-H-Malonyl-3Glc] <sup>-</sup> ,<br>621.4332 [M-H-Malonyl-4Glc] <sup>-</sup> ,<br>459.3844[M-H-Malonyl-5Glc] <sup>-</sup>                | Protopanaxadiol+4<br>Glc+Malonyl Glc                                                        |
| R289 | 18.54 | C <sub>58</sub> H <sub>98</sub> O <sub>26</sub>  | 1209.6272 | 0.33  | 1077.5841[M-H-Xyl] <sup>-</sup> ,<br>945.5413[M-H-Xyl-Ara(p)] <sup>-</sup> ,<br>783.4902[M-H-Xyl-Ara(p)-Glc] <sup>-</sup> ,<br>621.4371[M-H-Xyl-Ara(p)-2Glc] <sup>-</sup>                                                                                                            | Ginsenoside R <sub>a1</sub> <sup>a</sup>                                                    |

|      |       |                                                  |           |       |                                                                                                                                                                                                                                                                                                                            |                                                                                                     |
|------|-------|--------------------------------------------------|-----------|-------|----------------------------------------------------------------------------------------------------------------------------------------------------------------------------------------------------------------------------------------------------------------------------------------------------------------------------|-----------------------------------------------------------------------------------------------------|
|      |       |                                                  |           |       | 459.3835[M-H-Xyl-Ara(p)-3Glc] <sup>-</sup>                                                                                                                                                                                                                                                                                 |                                                                                                     |
| R290 | 18.56 | C <sub>60</sub> H <sub>100</sub> O <sub>27</sub> | 1251.6355 | -1.52 | 1077.5945[M-H-Ac-Xyl] <sup>-</sup> ,<br>945.5418[M-H-Ac-Xyl-ara(p)] <sup>-</sup> ,<br>783.4897[M-H-Ac-Xyl- ara(p)-Glc] <sup>-</sup> ,<br>621.4377[M-H-Ac-Xyl- ara(p)-2Glc] <sup>-</sup> ,<br>459.3839[M-H-Ac-Xyl- ara(p)-3Glc] <sup>-</sup>                                                                                | Ginsenoside Ra <sub>5</sub><br>isomer                                                               |
| R291 | 18.57 | C <sub>62</sub> H <sub>102</sub> O <sub>29</sub> | 1309.6445 | 1.22  | 1223.6338[M-H-Malonyl] <sup>-</sup> ,<br>1077.5852[M-H-Malonyl-Rha] <sup>-</sup> ,<br>945.5426[M-H-Malonyl-Rha-Xyl/Ara] <sup>-</sup> ,<br>783.4899[M-H-Malonyl-Rha-Xyl/Ara-<br>Glc] <sup>-</sup> ,<br>621.4382[M-H-Malonyl-Rha-Xyl/Ara-2<br>Glc] <sup>-</sup> ,<br>459.3824[M-H-Malonyl-Rha-Xyl/Ara-3<br>Glc] <sup>-</sup> | Protopanaxadiol+<br>Rha+Xyl/Ara+2Glc+<br>Malonyl Glc                                                |
| R292 | 18.58 | C <sub>57</sub> H <sub>94</sub> O <sub>26</sub>  | 1193.5937 | -1.51 | 1107.5844[M-H-Malonyl] <sup>-</sup> ,<br>945.5449[M-H-Malonyl-Glc] <sup>-</sup> ,<br>783.4917[M-H-Malonyl-2Glc] <sup>-</sup> ,<br>621.4375[M-H-Malonyl-3Glc] <sup>-</sup> ,<br>459.3895 [M-H-Malonyl-4Glc] <sup>-</sup>                                                                                                    | Malonyl-ginsenosid<br>e Rb <sub>1</sub> isomer                                                      |
| R293 | 18.59 | C <sub>59</sub> H <sub>100</sub> O <sub>27</sub> | 1239.6377 | 0.24  | 1107.5945[M-H-Glc] <sup>-</sup> ,<br>945.5399[M-H-Glc-Xyl] <sup>-</sup> ,<br>783.4880[M-H-2Glc-Xyl] <sup>-</sup> ,<br>621.4394[M-H-3Glc-Xyl] <sup>-</sup> ,<br>459.3839[M-H-4Glc-Xyl] <sup>-</sup>                                                                                                                         | Notoginsenoside R <sub>4</sub><br>isomer/Ginsenoside<br>Ra <sub>3</sub> isomer                      |
| R294 | 18.60 | C <sub>62</sub> H <sub>102</sub> O <sub>30</sub> | 1325.6361 | -1.28 | 1239.6375[M-H-Malonyl] <sup>-</sup> ,<br>1107.5938[M-H-Malonyl-Xyl] <sup>-</sup> ,<br>945.5428[M-H-Malonyl-Xyl-Glc] <sup>-</sup> ,<br>783.4893[M-H-Malonyl-Xyl-2Glc] <sup>-</sup> ,<br>621.4374[M-H-Malonyl-Xyl-3Glc] <sup>-</sup> ,<br>459.3838[M-H-Malonyl-Xyl-4Glc] <sup>-</sup>                                        | Malonyl-notoginsen<br>oside R <sub>4</sub><br>isomer/Malonyl-gin<br>senoside Ra <sub>3</sub> isomer |

|      |       |                                                 |           |       |                                                                                                                                                                                                                             |                                               |
|------|-------|-------------------------------------------------|-----------|-------|-----------------------------------------------------------------------------------------------------------------------------------------------------------------------------------------------------------------------------|-----------------------------------------------|
| R295 | 18.60 | C <sub>54</sub> H <sub>90</sub> O <sub>24</sub> | 1121.5722 | -1.96 | 1077.5829[M-H-CO <sub>2</sub> ] <sup>-</sup> ,<br>945.5391[M-H-Glu A] <sup>-</sup> ,<br>783.4904[M-H-Glu A-Glc] <sup>-</sup> ,<br>621.4357[M-H-Glu A-2Glc] <sup>-</sup> ,<br>459.3828[M-H-Glu A-3Glc] <sup>-</sup>          | Protopanaxadiol+Glu A+3Glc                    |
| R296 | 18.61 | C <sub>54</sub> H <sub>92</sub> O <sub>23</sub> | 1107.5950 | -0.09 | 945.5437[M-H-Glc] <sup>-</sup> ,<br>783.4900[M-H-2Glc] <sup>-</sup> ,<br>621.4373[M-H-3Glc] <sup>-</sup> ,<br>459.3863[M-H-4Glc] <sup>-</sup>                                                                               | Ginsenoside Rb <sub>1</sub> isomer            |
| R297 | 18.61 | C <sub>60</sub> H <sub>96</sub> O <sub>29</sub> | 1279.5959 | 0.00  | 1107.5977[M-H-2Malonyl] <sup>-</sup> ,<br>945.5449[M-H-2Malonyl-Glc] <sup>-</sup> ,<br>783.4931[M-H-2Malonyl-2Glc] <sup>-</sup> ,<br>621.4354[M-H-2Malonyl-3Glc] <sup>-</sup> ,<br>459.3859[M-H-2Malonyl-4Glc] <sup>-</sup> | Di-malonyl-ginsenoside Rb <sub>1</sub> isomer |
| R298 | 18.63 | C <sub>53</sub> H <sub>88</sub> O <sub>22</sub> | 1075.5700 | 1.02  | 943.5248[M-H-Xyl/Ara] <sup>-</sup> ,<br>781.4762[M-H-Xyl/Ara-Glc] <sup>-</sup> ,<br>619.4203[M-H-Xyl/Ara-2Glc] <sup>-</sup> ,<br>457.3685[M-H-Xyl/Ara-3Glc] <sup>-</sup>                                                    | Dehydrated-protopanaxatriol+3Glc+Xyl/Ara      |
| R299 | 18.66 | C <sub>44</sub> H <sub>74</sub> O <sub>14</sub> | 825.4988  | -1.45 | 783.4869[M-H-Ac] <sup>-</sup> ,<br>637.4297[M-H-Ac-Rha] <sup>-</sup> ,<br>475.3792[M-H-Ac-Rha-Glc] <sup>-</sup>                                                                                                             | Acetyl-ginsenoside Rg <sub>2</sub>            |
| R300 | 18.69 | C <sub>54</sub> H <sub>90</sub> O <sub>24</sub> | 1121.5761 | 1.52  | 1077.5846[M-H-CO <sub>2</sub> ] <sup>-</sup> ,<br>945.5435[M-H-Glu A] <sup>-</sup> ,<br>783.4907[M-H-Glu A-Glc] <sup>-</sup> ,<br>621.4352[M-H-Glu A-2Glc] <sup>-</sup> ,<br>459.3841[M-H-Glu A-3Glc] <sup>-</sup>          | Protopanaxadiol+Glu A+3Glc                    |
| R301 | 18.70 | C <sub>48</sub> H <sub>76</sub> O <sub>19</sub> | 955.4899  | -0.42 | 793.4385[M-H-Glc] <sup>-</sup> ,<br>731.4386[M-H-Glc-CO <sub>2</sub> -H <sub>2</sub> O] <sup>-</sup>                                                                                                                        | Ginsenoside Ro <sup>a</sup>                   |

|      |       |                                                  |                        |       |                                                                                                                                                                                                                                                                                                                                |                                        |
|------|-------|--------------------------------------------------|------------------------|-------|--------------------------------------------------------------------------------------------------------------------------------------------------------------------------------------------------------------------------------------------------------------------------------------------------------------------------------|----------------------------------------|
|      |       |                                                  |                        |       | 613.3731[M-H-2Glc-H <sub>2</sub> O] <sup>-</sup> ,<br>569.3847[M-H-2Glc-H <sub>2</sub> O-CO <sub>2</sub> ] <sup>-</sup> ,<br>455.3528[M-H-2Glc-Glu A] <sup>-</sup>                                                                                                                                                             |                                        |
| R302 | 18.71 | C <sub>60</sub> H <sub>100</sub> O <sub>27</sub> | 1251.6389              | 1.20  | 1209.6281[M-H-Ac] <sup>-</sup> ,<br>1077.5845[M-H-Ac-Xyl] <sup>-</sup> ,<br>945.5412[M-H-Ac-Xyl-ara(p)] <sup>-</sup> ,<br>783.4886[M-H-Ac-Xyl- ara(p)-Glc] <sup>-</sup> ,<br>621.4381[M-H-Ac-Xyl- ara(p)-2Glc] <sup>-</sup> ,<br>459.3839[M-H-Ac-Xyl- ara(p)-3Glc] <sup>-</sup>                                                | Ginsenoside Ra <sub>5</sub><br>isomer  |
| R303 | 18.71 | C <sub>55</sub> H <sub>92</sub> O <sub>23</sub>  | 1119.5968              | 1.25  | 1077.5806[M-H-Ac] <sup>-</sup> ,<br>945.5352[M-H-Ac-Ara(p)] <sup>-</sup> ,<br>783.4962[M-H-Ac-Ara(p)-Glc] <sup>-</sup> ,<br>621.4344[M-H-Ac-Ara(p)-2Glc] <sup>-</sup> ,<br>459.3892[M-H-Ac-Ara(p)-3Glc] <sup>-</sup>                                                                                                           | Ginsenoside Rs <sub>2</sub><br>isomer  |
| R304 | 18.73 | C <sub>42</sub> H <sub>66</sub> O <sub>14</sub>  | 793.4357               | -2.14 | 631.3856[M-H-Glc] <sup>-</sup> ,<br>455.3538[M-H-Glc-Glu A] <sup>-</sup>                                                                                                                                                                                                                                                       | Chikusetsusaponin<br>Iva isomer        |
| R305 | 18.75 | C <sub>56</sub> H <sub>94</sub> O <sub>24</sub>  | 1149.6046              | -0.96 | 1107.5938[M-H-Ac] <sup>-</sup> ,<br>945.5453[M-H-Ac-Glc] <sup>-</sup> ,<br>783.4894[M-H-Ac-2Glc] <sup>-</sup> ,<br>621.4366[M-H-Ac-3Glc] <sup>-</sup> ,<br>459.3822[M-H-Ac-4Glc] <sup>-</sup>                                                                                                                                  | Quinquenoside R <sub>1</sub><br>isomer |
| R306 | 18.77 | C <sub>50</sub> H <sub>78</sub> O <sub>20</sub>  | 1043.5060 <sup>b</sup> | -0.29 | 955.4778[M-H-Ac] <sup>-</sup> ,<br>793.4501[M-H-Ac-Glc] <sup>-</sup> ,<br>731.4313[M-H-Ac-Glc-CO <sub>2</sub> -H <sub>2</sub> O] <sup>-</sup> ,<br>613.3796[M-H-Ac-2Glc-H <sub>2</sub> O] <sup>-</sup> ,<br>569.3850[M-H-Ac-2Glc-H <sub>2</sub> O-CO <sub>2</sub> ] <sup>-</sup> ,<br>455.3524[M-H-Ac-2Glc-Glu A] <sup>-</sup> | Acetyl-ginsenoside<br>Ro               |
| R307 | 18.78 | C <sub>56</sub> H <sub>92</sub> O <sub>25</sub>  | 1163.5837              | -1.03 | 1077.5847[M-H-Malonyl] <sup>-</sup> ,<br>945.5422[M-H-Malonyl-Ara(f)] <sup>-</sup> ,<br>783.4894[M-H-Malonyl-Ara(f)-Glc] <sup>-</sup> ,<br>621.4321[M-H-Malonyl-Ara(f)-2Glc] <sup>-</sup>                                                                                                                                      | Malonyl-ginsenosid<br>e Rc             |

|      |       |                                                  |           |       |                                                                                                                                                                                                                                                                                                   |                                                                                      |
|------|-------|--------------------------------------------------|-----------|-------|---------------------------------------------------------------------------------------------------------------------------------------------------------------------------------------------------------------------------------------------------------------------------------------------------|--------------------------------------------------------------------------------------|
|      |       |                                                  |           |       | 459.3841[M-H-Malonyl-Ara(f)-3Glc] <sup>-</sup>                                                                                                                                                                                                                                                    |                                                                                      |
| R308 | 18.78 | C <sub>57</sub> H <sub>94</sub> O <sub>25</sub>  | 1177.6007 | 0.08  | 945.5461[M-H-Malonyl-Rha] <sup>-</sup> ,<br>783.4894[M-H-Malonyl-Rha-Glc] <sup>-</sup> ,<br>621.4360[M-H-Malonyl-Rha-2Glc] <sup>-</sup> ,<br>459.3818[M-H-Malonyl-Rha-3Glc] <sup>-</sup>                                                                                                          | Protopanaxadiol+<br>Rha+2Glc+ Malonyl<br>Glc                                         |
| R309 | 18.80 | C <sub>51</sub> H <sub>84</sub> O <sub>21</sub>  | 1031.5433 | 0.58  | 945.5455[M-H-Malonyl] <sup>-</sup> ,<br>783.4893[M-H-Malonyl-Glc] <sup>-</sup> ,<br>621.4326[M-H-Malonyl-2Glc] <sup>-</sup> ,<br>459.3844[M-H-Malonyl-3Glc] <sup>-</sup>                                                                                                                          | Malonyl-ginsenosid<br>e Rd isomer                                                    |
| R310 | 18.80 | C <sub>61</sub> H <sub>100</sub> O <sub>29</sub> | 1295.6268 | -0.31 | 1209.6307[M-H-Malonyl] <sup>-</sup> ,<br>1077.5858[M-H-Malonyl-Xyl] <sup>-</sup> ,<br>945.5420[M-H-Malonyl-Xyl-Ara] <sup>-</sup> ,<br>783.4886[M-H-Malonyl-Xyl-Ara-Glc] <sup>-</sup> ,<br>621.4398[M-H-Malonyl-Xyl-Ara-2Glc]<br><sup>-</sup> ,<br>459.3825[M-H-Malonyl-Xyl-Ara-3Glc] <sup>-</sup> | Malonyl-ginsenosid<br>e Ra <sub>1</sub> /<br>Malonyl-ginsenosid<br>e Ra <sub>2</sub> |
| R311 | 18.81 | C <sub>42</sub> H <sub>72</sub> O <sub>14</sub>  | 799.4856  | 1.50  | 637.4308[M-H-Glc] <sup>-</sup> ,<br>475.3791[M-H-2Glc] <sup>-</sup>                                                                                                                                                                                                                               | Ginsenoside Rf<br>isomer                                                             |
| R312 | 18.86 | C <sub>58</sub> H <sub>98</sub> O <sub>26</sub>  | 1209.6247 | -1.74 | 1077.5752[M-H-Xyl] <sup>-</sup> ,<br>945.5474[M-H-Xyl-Ara] <sup>-</sup> ,<br>783.4880[M-H-Xyl-Ara-Glc] <sup>-</sup> ,<br>621.4359[M-H-Xyl-Ara-2Glc] <sup>-</sup> ,<br>459.3845[M-H-Xyl-Ara-3Glc] <sup>-</sup>                                                                                     | Ginsenoside Ra <sub>1</sub><br>isomer/Ginsenoside<br>Ra <sub>2</sub> isomer          |
| R313 | 18.87 | C <sub>60</sub> H <sub>96</sub> O <sub>29</sub>  | 1279.5957 | -0.16 | 1107.5918[M-H-2Malonyl] <sup>-</sup> ,<br>945.5438[M-H-2Malonyl-Glc] <sup>-</sup> ,<br>783.4860[M-H-2Malonyl-2Glc] <sup>-</sup> ,<br>621.4385[M-H-2Malonyl-3Glc] <sup>-</sup> ,<br>459.3857[M-H-2Malonyl-4Glc] <sup>-</sup>                                                                       | Di-malonyl-ginseno<br>side Rb <sub>1</sub>                                           |
| R314 | 18.91 | C <sub>55</sub> H <sub>92</sub> O <sub>23</sub>  | 1119.5965 | 0.98  | 1077.5841[M-H-Ac] <sup>-</sup> ,<br>945.5428[M-H-Ac-Ara(p)] <sup>-</sup> ,                                                                                                                                                                                                                        | Ginsenoside Rs <sub>2</sub><br>isomer                                                |

|      |       |                                                  |           |       |                                                                                                                                                                                                                                                                                     |                                                                                                    |
|------|-------|--------------------------------------------------|-----------|-------|-------------------------------------------------------------------------------------------------------------------------------------------------------------------------------------------------------------------------------------------------------------------------------------|----------------------------------------------------------------------------------------------------|
|      |       |                                                  |           |       | 783.4896[M-H-Ac-Ara(p)-Glc] <sup>-</sup> ,<br>621.4369[M-H-Ac-Ara(p)-2Glc] <sup>-</sup> ,<br>459.3840[M-H-Ac-Ara(p)-3Glc] <sup>-</sup>                                                                                                                                              |                                                                                                    |
| R315 | 18.91 | C <sub>48</sub> H <sub>76</sub> O <sub>19</sub>  | 955.4904  | 0.10  | 793.4389[M-H-Glc] <sup>-</sup> ,<br>731.4376[M-H-Glc-CO <sub>2</sub> -H <sub>2</sub> O] <sup>-</sup> ,<br>613.3753[M-H-2Glc-H <sub>2</sub> O] <sup>-</sup> ,<br>569.3854[M-H-2Glc-H <sub>2</sub> O-CO <sub>2</sub> ] <sup>-</sup> ,<br>455.3521[M-H-2Glc-Glu A] <sup>-</sup>        | Ginsenoside Ro<br>isomer                                                                           |
| R316 | 18.96 | C <sub>62</sub> H <sub>102</sub> O <sub>30</sub> | 1325.6381 | 0.23  | 1239.6345[M-H-Malonyl] <sup>-</sup> ,<br>1107.5945[M-H-Malonyl-Xyl] <sup>-</sup> ,<br>945.5399[M-H-Malonyl-Xyl-Glc] <sup>-</sup> ,<br>783.4880[M-H-Malonyl-Xyl-2Glc] <sup>-</sup> ,<br>621.4394[M-H-Malonyl-Xyl-3Glc] <sup>-</sup> ,<br>459.3839[M-H-Malonyl-Xyl-4Glc] <sup>-</sup> | Malonyl-notoginsen<br>oside R <sub>4</sub><br>isomer/Malonyl-gin<br>senoside R <sub>3</sub> isomer |
| R317 | 18.96 | C <sub>44</sub> H <sub>74</sub> O <sub>14</sub>  | 825.4994  | -0.73 | 783.4867[M-H-Ac] <sup>-</sup> ,<br>637.4291[M-H-Ac-Rha] <sup>-</sup> ,<br>475.3800[M-H-Ac-Rha-Glc] <sup>-</sup>                                                                                                                                                                     | Acetyl-ginsenoside<br>Rg <sub>2</sub>                                                              |
| R318 | 18.96 | C <sub>54</sub> H <sub>90</sub> O <sub>24</sub>  | 1121.5755 | 0.98  | 1077.5817[M-H-CO <sub>2</sub> ] <sup>-</sup> ,<br>945.5435[M-H-Glu A] <sup>-</sup> ,<br>783.4898[M-H-Glu A-Glc] <sup>-</sup> ,<br>621.4363[M-H-Glu A-2Glc] <sup>-</sup> ,<br>459.3836[M-H-Glu A-3Glc] <sup>-</sup>                                                                  | Protopanaxadiol+Gl<br>u A+3Glc                                                                     |
| R319 | 19.03 | C <sub>58</sub> H <sub>98</sub> O <sub>26</sub>  | 1209.6290 | 1.82  | 1077.5848[M-H-Xyl] <sup>-</sup> ,<br>945.5434[M-H-Xyl-Ara] <sup>-</sup> ,<br>783.4905[M-H-Xyl-Ara-Glc] <sup>-</sup> ,<br>621.4381[M-H-Xyl-Ara-2Glc] <sup>-</sup> ,<br>459.3849[M-H-Xyl-Ara-3Glc] <sup>-</sup>                                                                       | Ginsenoside R <sub>a1</sub><br>isomer/Ginsenoside<br>R <sub>a2</sub> isomer                        |
| R320 | 19.03 | C <sub>57</sub> H <sub>94</sub> O <sub>26</sub>  | 1193.5947 | -0.67 | 1107.5983[M-H-Malonyl] <sup>-</sup> ,<br>945.5463[M-H-Malonyl-Glc] <sup>-</sup> ,<br>783.4893[M-H-Malonyl-2Glc] <sup>-</sup> ,<br>621.4371[M-H-Malonyl-3Glc] <sup>-</sup>                                                                                                           | Malonyl-ginsenosid<br>e Rb <sub>1</sub> isomer                                                     |

|      |       |                                                  |                       |       |                                                                                                                                                                                                                                                                                 |                                                                                  |
|------|-------|--------------------------------------------------|-----------------------|-------|---------------------------------------------------------------------------------------------------------------------------------------------------------------------------------------------------------------------------------------------------------------------------------|----------------------------------------------------------------------------------|
|      |       |                                                  |                       |       | 459.3842[M-H-Malonyl-4Glc] <sup>-</sup>                                                                                                                                                                                                                                         |                                                                                  |
| R321 | 19.07 | C <sub>43</sub> H <sub>72</sub> O <sub>14</sub>  | 857.4911 <sup>b</sup> | 1.40  | 637.4381[M-H-Ac-Xyl/Ara] <sup>-</sup> ,<br>475.3815[M-H-Ac-Xyl/Ara-Glc] <sup>-</sup>                                                                                                                                                                                            | Protopanaxatriol+<br>Xyl/Ara+Acetyl Glc                                          |
| R322 | 19.08 | C <sub>60</sub> H <sub>102</sub> O <sub>28</sub> | 1269.6456             | -1.81 | 1107.5911[M-H-Glc] <sup>-</sup> ,<br>945.5439[M-H-2Glc] <sup>-</sup> ,<br>783.4919[M-H-3Glc] <sup>-</sup> ,<br>621.4399[M-H-4Glc] <sup>-</sup> ,<br>459.3881[M-H-5Glc] <sup>-</sup>                                                                                             | Protopanaxadiol+5<br>Glc                                                         |
| R323 | 19.08 | C <sub>47</sub> H <sub>74</sub> O <sub>18</sub>  | 925.4802              | 0.54  | 793.4316[M-H-Xyl/Ara] <sup>-</sup> ,<br>763.4323[M-H-Glc] <sup>-</sup> ,<br>613.3762[M-H-Xyl/Ara-Glc-H <sub>2</sub> O] <sup>-</sup> ,<br>455.3538[M-H-Xyl/Ara-Glc-Glu A] <sup>-</sup>                                                                                           | Pseudo-ginsenoside<br>-RT <sub>1</sub><br>isomer/Chikusetsus<br>aponin IV isomer |
| R324 | 19.10 | C <sub>53</sub> H <sub>90</sub> O <sub>22</sub>  | 1077.5839             | -0.56 | 945.5392[M-H-Ara(p)] <sup>-</sup> ,<br>783.4884[M-H-Ara(p)-Glc] <sup>-</sup> ,<br>621.4386[M-H-Ara(p)-2Glc] <sup>-</sup> ,<br>459.3867[M-H-Ara(p)-3Glc] <sup>-</sup>                                                                                                            | Ginsenoside Rb <sub>2</sub> <sup>a</sup>                                         |
| R325 | 19.12 | C <sub>61</sub> H <sub>102</sub> O <sub>28</sub> | 1281.6491             | 0.94  | 1239.6388[M-H-Ac] <sup>-</sup> ,<br>1107.5963[M-H-Ac-Xyl/Ara] <sup>-</sup> ,<br>945.5442[M-H-Ac-Xyl/Ara-Glc] <sup>-</sup> ,<br>783.4909[M-H-Ac-Xyl/Ara-2Glc] <sup>-</sup> ,<br>621.4378[M-H-Ac-Xyl/Ara-3Glc] <sup>-</sup> ,<br>459.3850[M-H-Ac-Xyl/Ara-4Glc] <sup>-</sup>       | Acetyl-ginsenoside<br>Ra <sub>3</sub> /Acetyl-notogins<br>enoside R <sub>4</sub> |
| R326 | 19.13 | C <sub>60</sub> H <sub>100</sub> O <sub>27</sub> | 1251.6381             | 0.56  | 1209.6289[M-H-Ac] <sup>-</sup> ,<br>1077.5865[M-H-Ac-Xyl] <sup>-</sup> ,<br>945.5471[M-H-Ac-Xyl-ara(p)] <sup>-</sup> ,<br>783.4902[M-H-Ac-Xyl- ara(p)-Glc] <sup>-</sup> ,<br>621.4373[M-H-Ac-Xyl- ara(p)-2Glc] <sup>-</sup> ,<br>459.3838[M-H-Ac-Xyl- ara(p)-3Glc] <sup>-</sup> | Ginsenoside Ra <sub>5</sub><br>isomer                                            |
| R327 | 19.14 | C <sub>53</sub> H <sub>82</sub> O <sub>20</sub>  | 1083.5381             | 0.46  | 955.4847[M-H-Malonyl-Ac] <sup>-</sup> ,                                                                                                                                                                                                                                         | Malonyl+Acetyl<br>ginsenoside Ro                                                 |



|      |       |                                                  |           |       |                                                                                                                                                                                                                                                                                                |                                                                              |
|------|-------|--------------------------------------------------|-----------|-------|------------------------------------------------------------------------------------------------------------------------------------------------------------------------------------------------------------------------------------------------------------------------------------------------|------------------------------------------------------------------------------|
|      |       |                                                  |           |       | 793.4380[M-H-Malonyl-Ac-Glc],                                                                                                                                                                                                                                                                  |                                                                              |
|      |       |                                                  |           |       | 731.4424[M-H-Malonyl-Ac-Glc-CO <sub>2</sub> -H <sub>2</sub> O],                                                                                                                                                                                                                                |                                                                              |
|      |       |                                                  |           |       | 613.3773[M-H-Malonyl-Ac-2Glc-H <sub>2</sub> O],                                                                                                                                                                                                                                                |                                                                              |
|      |       |                                                  |           |       | 569.3868[M-H-Malonyl-Ac-2Glc-H <sub>2</sub> O-CO <sub>2</sub> ],                                                                                                                                                                                                                               |                                                                              |
|      |       |                                                  |           |       | 455.3549[M-H-Malonyl-Ac-2Glc-Glu A] <sup>-</sup>                                                                                                                                                                                                                                               |                                                                              |
| R328 | 19.17 | C <sub>61</sub> H <sub>100</sub> O <sub>29</sub> | 1295.6271 | -0.08 | 1209.6307[M-H-Malonyl] <sup>-</sup> ,<br>1077.5858[M-H-Malonyl-Xyl] <sup>-</sup> ,<br>945.5420[M-H-Malonyl-Xyl-Ara] <sup>-</sup> ,<br>783.4886[M-H-Malonyl-Xyl-Ara-Glc] <sup>-</sup> ,<br>621.4398[M-H-Malonyl-Xyl-Ara-2Glc] <sup>-</sup> ,<br>459.3825[M-H-Malonyl-Xyl-Ara-3Glc] <sup>-</sup> | Malonyl-ginsenoside Ra <sub>1</sub> /<br>Malonyl-ginsenoside Ra <sub>2</sub> |
| R329 | 19.21 | C <sub>42</sub> H <sub>72</sub> O <sub>14</sub>  | 799.4840  | -0.50 | 637.4321[M-H-Glc] <sup>-</sup> ,<br>475.3770[M-H-2Glc] <sup>-</sup>                                                                                                                                                                                                                            | Ginsenoside Rf isomer                                                        |
| R330 | 19.22 | C <sub>42</sub> H <sub>66</sub> O <sub>14</sub>  | 793.4386  | 1.51  | 631.3849[M-H-Glc] <sup>-</sup> ,<br>613.3763[M-H-Glc-H <sub>2</sub> O],<br>569.3846[M-H-Glc-H <sub>2</sub> O-CO <sub>2</sub> ],<br>455.3526[M-H-Glc-Glu A] <sup>-</sup>                                                                                                                        | Chikusetsusaponin Iva isomer                                                 |
| R331 | 19.23 | C <sub>60</sub> H <sub>100</sub> O <sub>27</sub> | 1251.6051 | -1.84 | 1209.6217[M-H-Ac] <sup>-</sup> ,<br>1077.5846[M-H-Ac-Xyl] <sup>-</sup> ,<br>945.5435[M-H-Ac-Xyl-ara(p)] <sup>-</sup> ,<br>783.4898[M-H-Ac-Xyl- ara(p)-Glc] <sup>-</sup> ,<br>621.4362[M-H-Ac-Xyl- ara(p)-2Glc] <sup>-</sup> ,<br>459.3823[M-H-Ac-Xyl- ara(p)-3Glc] <sup>-</sup>                | Ginsenoside Ra <sub>5</sub> isomer                                           |
| R332 | 19.23 | C <sub>62</sub> H <sub>102</sub> O <sub>30</sub> | 1325.6381 | 0.23  | 1239.6373[M-H-Malonyl] <sup>-</sup> ,<br>1107.5939[M-H-Malonyl-Xyl] <sup>-</sup>                                                                                                                                                                                                               | Malonyl-notoginsenoside R <sub>4</sub> isomer/Malonyl-gin                    |

|      |       |                                                 |                       |       |                                                             |                                                   |
|------|-------|-------------------------------------------------|-----------------------|-------|-------------------------------------------------------------|---------------------------------------------------|
|      |       |                                                 |                       |       | 945.5414[M-H-Malonyl-Xyl-Glc],                              | senoside Ra <sub>3</sub> isomer                   |
|      |       |                                                 |                       |       | 783.4899[M-H-Malonyl-Xyl-2Glc],                             |                                                   |
|      |       |                                                 |                       |       | 621.4370[M-H-Malonyl-Xyl-3Glc],                             |                                                   |
|      |       |                                                 |                       |       | 459.3854[M-H-Malonyl-Xyl-4Glc]                              |                                                   |
| R333 | 19.23 | C <sub>36</sub> H <sub>60</sub> O <sub>9</sub>  | 681.4225 <sup>b</sup> | 1.61  | 473.3669[M-H-Glc]                                           | Dehydrogenated-pr<br>otopanaxatriol+Glc           |
| R334 | 19.24 | C <sub>60</sub> H <sub>96</sub> O <sub>29</sub> | 1279.5957             | -0.16 |                                                             | Di-malonyl-ginseno<br>side Rb <sub>1</sub> isomer |
|      |       |                                                 |                       |       | 1107.5880[M-H-2Malonyl],                                    |                                                   |
|      |       |                                                 |                       |       | 945.5450[M-H-2Malonyl-Glc],                                 |                                                   |
|      |       |                                                 |                       |       | 783.4890[M-H-2Malonyl-2Glc],                                |                                                   |
|      |       |                                                 |                       |       | 621.4353[M-H-2Malonyl-3Glc],                                |                                                   |
|      |       |                                                 |                       |       | 459.3817[M-H-2Malonyl-4Glc]                                 |                                                   |
| R335 | 19.28 | C <sub>53</sub> H <sub>90</sub> O <sub>22</sub> | 1077.5830             | -1.39 | 945.5438[M-H-Xyl],                                          | Ginsenoside Rb <sub>3</sub> <sup>a</sup>          |
|      |       |                                                 |                       |       | 783.4917[M-H-Xyl-Glc],                                      |                                                   |
|      |       |                                                 |                       |       | 621.4368[M-H-Xyl-2Glc],                                     |                                                   |
|      |       |                                                 |                       |       | 459.3821[M-H-Xyl-3Glc]                                      |                                                   |
| R336 | 19.31 | C <sub>54</sub> H <sub>92</sub> O <sub>23</sub> | 1107.5949             | -0.18 | 945.5427[M-H-Glc],                                          | Ginsenoside Rb <sub>1</sub><br>isomer             |
|      |       |                                                 |                       |       | 783.4897[M-H-2Glc],                                         |                                                   |
|      |       |                                                 |                       |       | 621.4379[M-H-3Glc],                                         |                                                   |
|      |       |                                                 |                       |       | 459.3847[M-H-4Glc]                                          |                                                   |
| R337 | 19.37 | C <sub>51</sub> H <sub>78</sub> O <sub>22</sub> | 1041.4895             | -1.06 | 997.5104[M-H-CO <sub>2</sub> ],                             | Malonyl-ginsenosid<br>e Ro                        |
|      |       |                                                 |                       |       | 955.4934[M-H-Malonyl],                                      |                                                   |
|      |       |                                                 |                       |       | 937.4802[M-H-Malonyl-H <sub>2</sub> O],                     |                                                   |
|      |       |                                                 |                       |       | 835.4501[M-H-CO <sub>2</sub> -Glc],                         |                                                   |
|      |       |                                                 |                       |       | 793.4376[M-H-Malonyl-Glc],                                  |                                                   |
|      |       |                                                 |                       |       | 731.4386[M-H-Malonyl-Glc-CO <sub>2</sub> -H <sub>2</sub> O] |                                                   |
|      |       |                                                 |                       |       | ,                                                           |                                                   |
|      |       |                                                 |                       |       | 613.3726[M-H-Malonyl-2Glc-H <sub>2</sub> O],                |                                                   |
|      |       |                                                 |                       |       | 569.3844[M-H-Malonyl-2Glc-H <sub>2</sub> O-CO <sub>2</sub>  |                                                   |

|      |       |                                                  |                       |       |                                                                                                                                                                                                                                                                                                                |                                                      |
|------|-------|--------------------------------------------------|-----------------------|-------|----------------------------------------------------------------------------------------------------------------------------------------------------------------------------------------------------------------------------------------------------------------------------------------------------------------|------------------------------------------------------|
|      |       |                                                  |                       |       | ];                                                                                                                                                                                                                                                                                                             |                                                      |
|      |       |                                                  |                       |       | 455.3516[M-H-Malonyl-2Glc-Glu A] <sup>-</sup>                                                                                                                                                                                                                                                                  |                                                      |
| R338 | 19.37 | C <sub>62</sub> H <sub>102</sub> O <sub>29</sub> | 1309.6443             | 1.07  | 1223.6461[M-H-Malonyl] <sup>-</sup> ,<br>1077.5978[M-H-Malonyl-Rha] <sup>-</sup> ,<br>945.5418[M-H-Malonyl-Rha-Xyl/Ara] <sup>-</sup> ,<br>783.4874[M-H-Malonyl-Rha-Xyl/Ara-Glc] <sup>-</sup> ,<br>621.4355[M-H-Malonyl-Rha-Xyl/Ara-2Glc] <sup>-</sup> ,<br>459.3845[M-H-Malonyl-Rha-Xyl/Ara-3Glc] <sup>-</sup> | Protopanaxadiol+<br>Rha+Xyl/Ara+2Glc+<br>Malonyl Glc |
| R339 | 19.39 | C <sub>56</sub> H <sub>92</sub> O <sub>25</sub>  | 1163.5847             | -0.17 | 1077.5862[M-H-Malonyl] <sup>-</sup> ,<br>945.5449[M-H-Malonyl-Ara(p)] <sup>-</sup> ,<br>783.4901[M-H-Malonyl-Ara(p)-Glc] <sup>-</sup> ,<br>621.4371[M-H-Malonyl-Ara(p)-2Glc] <sup>-</sup> ,<br>459.3861[M-H-Malonyl-Ara(p)-3Glc] <sup>-</sup>                                                                  | Malonyl-ginsenosid<br>e Rb <sub>2</sub>              |
| R340 | 19.41 | C <sub>53</sub> H <sub>88</sub> O <sub>22</sub>  | 1075.5670             | -1.77 | 943.5227[M-H-Xyl/Ara] <sup>-</sup> ,<br>781.4702[M-H-Xyl/Ara-Glc] <sup>-</sup> ,<br>619.4219[M-H-Xyl/Ara-2Glc] <sup>-</sup> ,<br>457.3678[M-H-Xyl/Ara-3Glc] <sup>-</sup>                                                                                                                                       | Dehydrated-protop<br>anaxatriol+3Glc+Xyl<br>/Ara     |
| R341 | 19.42 | C <sub>36</sub> H <sub>64</sub> O <sub>10</sub>  | 701.4478 <sup>b</sup> | 0.29  | 493.3874[M-H-Glc] <sup>-</sup>                                                                                                                                                                                                                                                                                 | Double bond<br>hydrated-protopana<br>xatriol+Glc     |
| R342 | 19.42 | C <sub>40</sub> H <sub>68</sub> O <sub>12</sub>  | 785.4696 <sup>b</sup> | 1.15  | 607.4248[M-H-Xyl] <sup>-</sup> ,<br>475.3793[M-H-Xyl-Ara] <sup>-</sup>                                                                                                                                                                                                                                         | Protopanaxatriol+<br>Xyl+Ara                         |
| R343 | 19.43 | C <sub>44</sub> H <sub>68</sub> O <sub>15</sub>  | 835.4500              | 2.39  | 793.4376[M-H-Ac] <sup>-</sup> ,<br>775.4375[M-H-Ac-H <sub>2</sub> O] <sup>-</sup> ,<br>631.3806[M-H-Ac-Glc] <sup>-</sup> ,<br>613.3728[M-H-Ac-Glc-H <sub>2</sub> O] <sup>-</sup> ,<br>455.3527[M-H-Ac-Glc-Glu A] <sup>-</sup>                                                                                  | Acetyl-zingibroside<br>R <sub>1</sub>                |

|      |       |                                                 |           |       |                                                                                                                                                                                                                                                             |                                                                             |
|------|-------|-------------------------------------------------|-----------|-------|-------------------------------------------------------------------------------------------------------------------------------------------------------------------------------------------------------------------------------------------------------------|-----------------------------------------------------------------------------|
| R344 | 19.45 | C <sub>47</sub> H <sub>74</sub> O <sub>18</sub> | 925.4798  | 0.11  | 793.4359[M-H-Xyl],<br>763.4279[M-H-Glc],<br><br>613.3743[M-H-Xyl-Glc-H <sub>2</sub> O],<br>455.3523[M-H-Xyl-Glc-Glu A]                                                                                                                                      | Pseudoginsenoside-<br>RT <sub>1</sub>                                       |
| R345 | 19.49 | C <sub>58</sub> H <sub>98</sub> O <sub>26</sub> | 1209.6259 | -0.74 | 1077.5853[M-H-Xyl],<br>945.5446[M-H-Xyl-Ara],<br>783.4912[M-H-Xyl-Ara-Glc],<br>621.4352[M-H-Xyl-Ara-2Glc],<br>459.3871[M-H-Xyl-Ara-3Glc]                                                                                                                    | Ginsenoside Ra <sub>1</sub><br>isomer/Ginsenoside<br>Ra <sub>2</sub> isomer |
| R346 | 19.49 | C <sub>48</sub> H <sub>76</sub> O <sub>18</sub> | 939.4953  | 0.00  | 777.4439[M-H-Glc],<br>733.4515[M-H-Glc-CO <sub>2</sub> ],<br><br>715.4413[M-H-Glc-CO <sub>2</sub> -H <sub>2</sub> O],<br>613.3743[M-H-Glc-Rha-H <sub>2</sub> O],<br>569.3852[M-H-Glc-Rha-H <sub>2</sub> O-CO <sub>2</sub> ],<br>455.3532[M-H-Glc-Rha-Glu A] | Oleanolic aglycone+<br>Glc+Rha+Glu A                                        |
| R347 | 19.52 | C <sub>60</sub> H <sub>96</sub> O <sub>29</sub> | 1279.5951 | -0.63 | 1107.5962[M-H-2Malonyl],<br>945.5401[M-H-2Malonyl-Glc],<br>783.4888[M-H-2Malonyl-2Glc],<br>621.4383[M-H-2Malonyl-3Glc],<br>459.3836[M-H-2Malonyl-4Glc]                                                                                                      | Di-malonyl-ginseno-<br>side Rb <sub>1</sub> isomer                          |
| R348 | 19.54 | C <sub>47</sub> H <sub>74</sub> O <sub>18</sub> | 925.4796  | -0.11 | 793.4389[M-H-Ara],<br>613.3744[M-H-Ara-Glc-H <sub>2</sub> O],<br>455.3550[M-H-Ara-Glc-Glu A]                                                                                                                                                                | Chikusetsusaponin<br>IV                                                     |
| R349 | 19.55 | C <sub>56</sub> H <sub>92</sub> O <sub>25</sub> | 1163.5842 | -0.60 | 1077.5854[M-H-Malonyl],<br>945.5452[M-H-Malonyl-Xyl],<br>783.4902[M-H-Malonyl-Xyl-Glc],<br><br>621.4372[M-H-Malonyl-Xyl-2Glc],<br>459.3836[M-H-Malonyl-Xyl-3Glc]                                                                                            | Malonyl-ginsenosid<br>e Rb <sub>3</sub>                                     |
| R350 | 19.55 | C <sub>50</sub> H <sub>78</sub> O <sub>20</sub> | 997.5024  | 1.60  | 955.4882[M-H-Ac],<br>793.4370[M-H-Ac-Glc],<br><br>731.4380[M-H-Ac-Glc-CO <sub>2</sub> -H <sub>2</sub> O],                                                                                                                                                   | Acetyl ginsenoside<br>Ro                                                    |

|      |       |                                                 |                        |       |                                                                                                                                                                                                                                                                                  |                                                                                                         |
|------|-------|-------------------------------------------------|------------------------|-------|----------------------------------------------------------------------------------------------------------------------------------------------------------------------------------------------------------------------------------------------------------------------------------|---------------------------------------------------------------------------------------------------------|
|      |       |                                                 |                        |       | 613.3746[M-H-Ac-2Glc-H <sub>2</sub> O] <sup>-</sup> ,<br>569.3854[M-H-Ac-2Glc-H <sub>2</sub> O-CO <sub>2</sub> ] <sup>-</sup> ,<br>455.3538[M-H-Ac-2Glc-Glu A] <sup>-</sup>                                                                                                      |                                                                                                         |
| R351 | 19.59 | C <sub>53</sub> H <sub>90</sub> O <sub>22</sub> | 1077.5831              | -1.30 | 945.5436[M-H-Xyl/Ara] <sup>-</sup> ,<br>783.4892[M-H-Xyl/Ara-Glc] <sup>-</sup> ,<br>621.4373[M-H-Xyl/Ara-2Glc] <sup>-</sup> ,<br>459.3839[M-H-Xyl/Ara-3Glc] <sup>-</sup>                                                                                                         | Ginsenoside Rc<br>isomer/Ginsenoside<br>Rb <sub>2</sub><br>isomer/Ginsenoside<br>Rb <sub>3</sub> isomer |
| R352 | 19.62 | C <sub>60</sub> H <sub>96</sub> O <sub>29</sub> | 1279.5959              | 0.00  | 1107.5955[M-H-2Malonyl] <sup>-</sup> ,<br>945.5436[M-H-2Malonyl-Glc] <sup>-</sup> ,<br>783.4926[M-H-2Malonyl-2Glc] <sup>-</sup> ,<br>621.4370[M-H-2Malonyl-3Glc] <sup>-</sup> ,<br>459.3842[M-H-2Malonyl-4Glc] <sup>-</sup>                                                      | Di-malonyl-ginseno<br>side Rb <sub>1</sub> isomer                                                       |
| R353 | 19.69 | C <sub>52</sub> H <sub>80</sub> O <sub>20</sub> | 1023.5167              | 0.20  | 793.4422[M-H-(E)-but-2-enoyl-Glc] <sup>-</sup> ,<br>613.3751[M-H-(E)-but-2-enoyl-2Glc-H <sub>2</sub><br>O] <sup>-</sup> ,<br>569.3848[M-H-(E)-but-2-enoyl-2Glc-H <sub>2</sub><br>O-CO <sub>2</sub> ] <sup>-</sup> ,<br>455.3507[M-H-(E)-but-2-enoyl-2Glc-Gl<br>u A] <sup>-</sup> | (E)-But-2-enoyl<br>ginsenoside Ro                                                                       |
| R354 | 19.70 | C <sub>54</sub> H <sub>90</sub> O <sub>24</sub> | 1121.5757              | 1.16  | 1077.5817[M-H-CO <sub>2</sub> ] <sup>-</sup> ,<br>945.5435[M-H-Glu A] <sup>-</sup> ,<br>783.4898[M-H-Glu A-Glc] <sup>-</sup> ,<br>621.4363[M-H-Glu A-2Glc] <sup>-</sup> ,<br>459.3836[M-H-Glu A-3Glc] <sup>-</sup>                                                               | Protopanaxadiol+Gl<br>u A+3Glc                                                                          |
| R355 | 19.72 | C <sub>57</sub> H <sub>94</sub> O <sub>26</sub> | 1193.5941              | -1.17 | 1107.5844[M-H-Malonyl] <sup>-</sup> ,<br>945.5494[M-H-Malonyl-Glc] <sup>-</sup> ,<br>783.4945[M-H-Malonyl-2Glc] <sup>-</sup> ,<br>621.4383[M-H-Malonyl-3Glc] <sup>-</sup> ,<br>459.3871[M-H-Malonyl-4Glc] <sup>-</sup>                                                           | Malonyl-ginsenosid<br>e Rb <sub>1</sub> isomer                                                          |
| R356 | 19.75 | C <sub>53</sub> H <sub>88</sub> O <sub>23</sub> | 1137.5699 <sup>b</sup> | 0.53  | 1091.6007[M-H] <sup>-</sup> ,                                                                                                                                                                                                                                                    | Protopanaxadiol+R<br>ha+3Glc                                                                            |

|      |       |                                                  |                        |       |                                        |                                           |
|------|-------|--------------------------------------------------|------------------------|-------|----------------------------------------|-------------------------------------------|
|      |       |                                                  |                        |       | 945.5386[M-H-Rha]-                     |                                           |
|      |       |                                                  |                        |       | 783.4919[M-H-Rha-Glc]-                 |                                           |
|      |       |                                                  |                        |       | 621.4356[M-H-Rha-2Glc]-                |                                           |
|      |       |                                                  |                        |       | 459.3863[M-H-Rha-3Glc]-                |                                           |
| R357 | 19.76 | C <sub>60</sub> H <sub>100</sub> O <sub>27</sub> | 1251.6399              | 2.00  | 1209.6260[M-H-Ac]-                     | Ginsenoside Ra <sub>s</sub>               |
|      |       |                                                  |                        |       | 1077.5836[M-H-Ac-Xyl]-                 | isomer                                    |
|      |       |                                                  |                        |       | 945.5417[M-H-Ac-Xyl-ara(p)]-           |                                           |
|      |       |                                                  |                        |       | 783.4888[M-H-Ac-Xyl- ara(p)-Glc]-      |                                           |
|      |       |                                                  |                        |       | 621.4368[M-H-Ac-Xyl- ara(p)-2Glc]-     |                                           |
|      |       |                                                  |                        |       | 459.3839[M-H-Ac-Xyl- ara(p)-3Glc]-     |                                           |
| R358 | 19.76 | C <sub>56</sub> H <sub>94</sub> O <sub>24</sub>  | 1149.6056              | -0.09 | 1107.5945[M-H-Ac]-                     | Quinquenoside R <sub>1</sub> <sup>a</sup> |
|      |       |                                                  |                        |       | 945.5436[M-H-Ac-Glc]-                  |                                           |
|      |       |                                                  |                        |       | 783.4880[M-H-Ac-2Glc]-                 |                                           |
|      |       |                                                  |                        |       | 621.4371[M-H-Ac-3Glc]-                 |                                           |
|      |       |                                                  |                        |       | 459.3827 [M-H-Ac-4Glc]-                |                                           |
| R359 | 19.81 | C <sub>54</sub> H <sub>92</sub> O <sub>23</sub>  | 1107.5951              | 0.00  | 945.5396[M-H-Glc]-                     | Ginsenoside Rb <sub>1</sub>               |
|      |       |                                                  |                        |       | 783.4886[M-H-2Glc]-                    | isomer                                    |
|      |       |                                                  |                        |       | 621.4380[M-H-3Glc]-                    |                                           |
|      |       |                                                  |                        |       | 459.3831[M-H-4Glc]-                    |                                           |
| R360 | 19.81 | C <sub>48</sub> H <sub>80</sub> O <sub>18</sub>  | 943.5251               | -1.59 | 781.4766[M-H-Glc]-                     | Dehydrated-protop                         |
|      |       |                                                  |                        |       | 619.4234[M-H-2Glc]-                    | anaxatriol+3Glc                           |
|      |       |                                                  |                        |       | 457.3694[M-H-3Glc]-                    |                                           |
| R361 | 19.84 | C <sub>42</sub> H <sub>72</sub> O <sub>14</sub>  | 799.4847               | 0.38  | 637.4288[M-H-Glc]-                     | Ginsenoside Rf                            |
|      |       |                                                  |                        |       | 475.3797[M-H-2Glc]-                    | isomer                                    |
| R362 | 19.84 | C <sub>42</sub> H <sub>66</sub> O <sub>14</sub>  | 793.4374               | 0.00  | 631.3944[M-H-Glc]-                     | Chikusetsusaponin                         |
|      |       |                                                  |                        |       | 455.3521[M-H-Glc-Glu A]-               | Iva isomer                                |
| R363 | 19.85 | C <sub>51</sub> H <sub>84</sub> O <sub>21</sub>  | 1031.5433 <sup>b</sup> | 0.58  | 943.5408[M-H-Ac]-                      | Dehydrated-protop                         |
|      |       |                                                  |                        |       | 781.4747[M-H-Ac-Glc]-                  | anaxatriol+Acetyl                         |
|      |       |                                                  |                        |       | 763.4615[M-H-Ac-Glc-H <sub>2</sub> O]- | Glc+2Glc                                  |

|      |       |                                                  |                        |       |                                                                                                                                                                                                                                                                           |                                                                                     |
|------|-------|--------------------------------------------------|------------------------|-------|---------------------------------------------------------------------------------------------------------------------------------------------------------------------------------------------------------------------------------------------------------------------------|-------------------------------------------------------------------------------------|
|      |       |                                                  |                        |       | 619.4192[M-H-Ac-2Glc] <sup>-</sup> ,<br>457.3654[M-H-Ac-3Glc] <sup>-</sup>                                                                                                                                                                                                |                                                                                     |
| R364 | 19.86 | C <sub>50</sub> H <sub>84</sub> O <sub>19</sub>  | 987.5538               | 0.91  | 945.5446[M-H-Ac] <sup>-</sup> ,<br>783.4880[M-H-Ac-Glc] <sup>-</sup> ,<br>621.4377[M-H-Ac-2Glc] <sup>-</sup> ,<br>459.3817[M-H-Ac-3Glc] <sup>-</sup>                                                                                                                      | Acetyl-ginsenoside<br>Rd                                                            |
| R365 | 19.87 | C <sub>57</sub> H <sub>94</sub> O <sub>25</sub>  | 1177.6007              | 0.08  | 945.5461[M-H-Malonyl-Rha] <sup>-</sup> ,<br>783.4894[M-H-Malonyl-Rha-Glc] <sup>-</sup> ,<br>621.4360[M-H-Malonyl-Rha-2Glc] <sup>-</sup> ,<br>459.3818[M-H-Malonyl-Rha-3Glc] <sup>-</sup>                                                                                  | Protopanaxadiol+<br>Rha+2Glc+Malonyl<br>Glc                                         |
| R366 | 19.89 | C <sub>50</sub> H <sub>82</sub> O <sub>20</sub>  | 1047.5387 <sup>b</sup> | 1.05  | 915.5361[M-H-Malonyl] <sup>-</sup> ,<br>783.4871[M-H-Malonyl-Xyl/Ara] <sup>-</sup> ,<br>621.4372[M-H-Malonyl-Xyl/Ara-Glc] <sup>-</sup> ,<br>459.3854[M-H-Malonyl-Xyl/Ara-2Glc] <sup>-</sup>                                                                               | Protopanaxadio+Xy<br>l/Ara+Glc+malonyl<br>Glc                                       |
| R367 | 19.91 | C <sub>61</sub> H <sub>102</sub> O <sub>28</sub> | 1281.6464              | -1.17 | 1239.6306[M-H-Ac] <sup>-</sup> ,<br>1107.5948[M-H-Ac-Xyl/Ara] <sup>-</sup> ,<br>945.5497[M-H-Ac-Xyl/Ara-Glc] <sup>-</sup> ,<br>783.4878[M-H-Ac-Xyl/Ara-2Glc] <sup>-</sup> ,<br>621.4354[M-H-Ac-Xyl/Ara-3Glc] <sup>-</sup> ,<br>459.3835[M-H-Ac-Xyl/Ara-4Glc] <sup>-</sup> | Acetyl-ginsenoside<br>Ra <sub>3</sub> /Acetyl-notogins<br>enoside R <sub>4</sub>    |
| R368 | 19.92 | C <sub>47</sub> H <sub>74</sub> O <sub>18</sub>  | 925.4786               | -1.19 | 793.4379[M-H-Xyl/Ara] <sup>-</sup> ,<br>763.4317[M-H-Glc] <sup>-</sup> ,<br>613.3748[M-H-Xyl/Ara-Glc-H <sub>2</sub> O] <sup>-</sup> ,<br>455.3550[M-H-Xyl/Ara-Glc-Glu A] <sup>-</sup>                                                                                     | Pseudo-ginsenoside<br>-RT <sub>1</sub><br>isomer/Chikusetsus<br>aponin IV isomer    |
| R369 | 19.92 | C <sub>61</sub> H <sub>100</sub> O <sub>29</sub> | 1295.6278              | 0.46  | 1209.6318[M-H-Malonyl] <sup>-</sup> ,<br>1077.5848[M-H-Malonyl-Xyl] <sup>-</sup> ,<br>945.5450[M-H-Malonyl-Xyl-Ara] <sup>-</sup> ,<br>783.4901[M-H-Malonyl-Xyl-Ara-Glc] <sup>-</sup>                                                                                      | Malonyl-ginsenosid<br>e<br>Ra <sub>1</sub> /Malonyl-ginsen<br>oside Ra <sub>2</sub> |

|      |       |                                                  |           |       |                                                                                                                                                                                                                                                                                                                                                                    |                                                                                                                      |
|------|-------|--------------------------------------------------|-----------|-------|--------------------------------------------------------------------------------------------------------------------------------------------------------------------------------------------------------------------------------------------------------------------------------------------------------------------------------------------------------------------|----------------------------------------------------------------------------------------------------------------------|
|      |       |                                                  |           |       | 621.4370[M-H-Malonyl-Xyl-Ara-2Glc]<br>-                                                                                                                                                                                                                                                                                                                            |                                                                                                                      |
|      |       |                                                  |           |       | 459.3867[M-H-Malonyl-Xyl-Ara-3Glc]<br>-                                                                                                                                                                                                                                                                                                                            |                                                                                                                      |
| R370 | 19.94 | C <sub>60</sub> H <sub>100</sub> O <sub>27</sub> | 1251.6377 | 0.24  | 1209.6288[M-H-Ac]-,<br>1077.5878[M-H-Ac-Xyl]-,<br>945.5459[M-H-Ac-Xyl-ara(p)]-,<br>783.4923[M-H-Ac-Xyl- ara(p)-Glc]-,<br>621.4391[M-H-Ac-Xyl- ara(p)-2Glc]-,<br>459.3857[M-H-Ac-Xyl- ara(p)-3Glc]-                                                                                                                                                                 | Ginsenoside Ra <sub>5</sub><br>isomer                                                                                |
| R371 | 19.94 | C <sub>42</sub> H <sub>72</sub> O <sub>14</sub>  | 799.4850  | 0.75  | 637.4313[M-H-Glc]-,<br>475.3790[M-H-2Glc]-                                                                                                                                                                                                                                                                                                                         | Ginsenoside Rf<br>isomer                                                                                             |
| R372 | 19.95 | C <sub>57</sub> H <sub>94</sub> O <sub>23</sub>  | 1145.6084 | -2.09 | 945.5468[M-H-(E)-but-2-enoyl-Ara]-,<br>783.4857[M-H-(E)-but-2-enoyl-Ara-Glc]<br>],<br>621.4389[M-H-(E)-but-2-enoyl-Ara-2Gl<br>c]-,<br>459.3842[M-H-(E)-but-2-enoyl-Ara-3Gl<br>c]-                                                                                                                                                                                  | Ginsenoside Ra <sub>7</sub><br>ismoer/Ginsenoside<br>Ra <sub>8</sub><br>isomer/Ginsenoside<br>Ra <sub>9</sub> isomer |
| R373 | 19.97 | C <sub>57</sub> H <sub>94</sub> O <sub>26</sub>  | 1193.5945 | -0.84 | 1107.5961[M-H-Malonyl]-,<br>945.5444[M-H-Malonyl-Glc]-,<br>783.4915[M-H-Malonyl-2Glc]-,<br>621.4359[M-H-Malonyl-3Glc]-,<br>459.3847[M-H-Malonyl-4Glc]-                                                                                                                                                                                                             | Malonyl-ginsenosid<br>e Rb <sub>1</sub> isomer                                                                       |
| R374 | 19.98 | C <sub>51</sub> H <sub>78</sub> O <sub>22</sub>  | 1041.4905 | -0.10 | 997.5105[M-H-CO <sub>2</sub> ]-,<br>955.4903[M-H-Malonyl]-,<br>937.4792[M-H-Malonyl-H <sub>2</sub> O]-,<br>835.4482[M-H-CO <sub>2</sub> -Glc]-,<br>793.4376[M-H-Malonyl-Glc]-,<br>731.4372[M-H-Malonyl-Glc-CO <sub>2</sub> -H <sub>2</sub> O]-<br>,<br>613.3749[M-H-Malonyl-2Glc-H <sub>2</sub> O]-,<br>569.3847[M-H-Malonyl-2Glc-H <sub>2</sub> O-CO <sub>2</sub> | Malonyl-ginsenosid<br>e Ro                                                                                           |



|      |       |                                                 |                        |       |                                                                                                                                                                                                                                                                                                                                |                                                  |
|------|-------|-------------------------------------------------|------------------------|-------|--------------------------------------------------------------------------------------------------------------------------------------------------------------------------------------------------------------------------------------------------------------------------------------------------------------------------------|--------------------------------------------------|
|      |       |                                                 |                        |       | ];                                                                                                                                                                                                                                                                                                                             |                                                  |
|      |       |                                                 |                        |       | 455.3528[M-H-Malonyl-2Glc-Glu A] <sup>-</sup>                                                                                                                                                                                                                                                                                  |                                                  |
| R375 | 19.98 | C <sub>53</sub> H <sub>88</sub> O <sub>23</sub> | 1137.5675 <sup>b</sup> | -1.58 | 1091.5061[M-H] <sup>-</sup> ,<br>945.5502[M-H-Rha] <sup>-</sup> ,<br>783.4934[M-H-Rha-Glc] <sup>-</sup> ,<br>621.4410[M-H-Rha-2Glc] <sup>-</sup> ,<br>459.3882[M-H-Rha-3Glc] <sup>-</sup>                                                                                                                                      | Protopanaxadiol+R<br>ha+3Glc                     |
| R376 | 19.99 | C <sub>56</sub> H <sub>94</sub> O <sub>24</sub> | 1149.6063              | 0.52  | 1107.5995[M-H-Ac] <sup>-</sup> ,<br>945.5463[M-H-Ac-Glc] <sup>-</sup> ,<br>783.4916[M-H-Ac-2Glc] <sup>-</sup> ,<br>621.4371[M-H-Ac-3Glc] <sup>-</sup> ,<br>459.3832[M-H-Ac-4Glc] <sup>-</sup>                                                                                                                                  | Quinquenoside R <sub>1</sub><br>isomer           |
| R377 | 20.00 | C <sub>50</sub> H <sub>82</sub> O <sub>20</sub> | 1047.5400 <sup>b</sup> | 2.29  | 915.5372[M-H-Malonyl] <sup>-</sup> ,<br>753.4806[M-H-Malonyl-Glc] <sup>-</sup> ,<br>621.4372[M-H-Malonyl-Glc-Xyl/Ara] <sup>-</sup> ,<br>459.3854[M-H-Malonyl-2Glc-Xyl/Ara] <sup>-</sup>                                                                                                                                        | Protopanaxadio+Xy<br>l/Ara+Glc+ malonyl<br>Glc   |
| R378 | 20.01 | C <sub>50</sub> H <sub>78</sub> O <sub>20</sub> | 997.5012               | 0.40  | 955.4804[M-H-Ac] <sup>-</sup> ,<br>793.4379[M-H-Ac-Glc] <sup>-</sup> ,<br>731.4380[M-H-Ac-Glc-CO <sub>2</sub> -H <sub>2</sub> O] <sup>-</sup> ,<br>613.3776[M-H-Ac-2Glc-H <sub>2</sub> O] <sup>-</sup> ,<br>569.3849[M-H-Ac-2Glc-H <sub>2</sub> O-CO <sub>2</sub> ] <sup>-</sup> ,<br>455.3527[M-H-Ac-2Glc-Glu A] <sup>-</sup> | Acetyl ginsenoside<br>Ro                         |
| R379 | 20.06 | C <sub>54</sub> H <sub>90</sub> O <sub>24</sub> | 1121.5760              | 1.43  | 1077.5817[M-H-CO <sub>2</sub> ] <sup>-</sup> ,<br>945.5435[M-H-Glu A] <sup>-</sup> ,<br>783.4898[M-H-Glu A-Glc] <sup>-</sup> ,<br>621.4363[M-H-Glu A-2Glc] <sup>-</sup> ,<br>459.3836[M-H-Glu A-3Glc] <sup>-</sup>                                                                                                             | Protopanaxadiol+Gl<br>u A+3Glc                   |
| R380 | 20.07 | C <sub>53</sub> H <sub>88</sub> O <sub>22</sub> | 1075.5671              | -1.67 | 943.5288[M-H-Xyl/Ara] <sup>-</sup> ,<br>781.4751[M-H-Xyl/Ara-Glc] <sup>-</sup>                                                                                                                                                                                                                                                 | Dehydrated-protop<br>anaxatriol+3Glc+Xyl<br>/Ara |

|      |       |                                                 |           |       |                                                                                                                                                                                                                                                                              |                                                                                                         |
|------|-------|-------------------------------------------------|-----------|-------|------------------------------------------------------------------------------------------------------------------------------------------------------------------------------------------------------------------------------------------------------------------------------|---------------------------------------------------------------------------------------------------------|
|      |       |                                                 |           |       | 619.4372[M-H-Xyl/Ara-2Glc] <sup>-</sup> ,<br>457.3701[M-H-Xyl/Ara-3Glc] <sup>-</sup>                                                                                                                                                                                         |                                                                                                         |
| R381 | 20.10 | C <sub>48</sub> H <sub>82</sub> O <sub>17</sub> | 929.5488  | 1.51  | 767.4883[M-H-Glc] <sup>-</sup> ,<br>605.4429[M-H-2Glc] <sup>-</sup> ,<br>443.3901[M-H-3Glc] <sup>-</sup>                                                                                                                                                                     | Vina-ginsenosideR3                                                                                      |
| R382 | 20.11 | C <sub>50</sub> H <sub>84</sub> O <sub>19</sub> | 987.5524  | -0.51 | 621.4370[M-H-Ac-2Glc] <sup>-</sup> ,<br>459.3854[M-H-Ac-3Glc] <sup>-</sup>                                                                                                                                                                                                   | Acetyl-ginsenoside<br>Rd                                                                                |
| R383 | 20.13 | C <sub>53</sub> H <sub>90</sub> O <sub>22</sub> | 1077.5834 | -1.02 | 945.5458[M-H-Xyl/Ara] <sup>-</sup> ,<br>783.4869[M-H-Xyl/Ara-Glc] <sup>-</sup> ,<br>621.4376[M-H-Xyl/Ara-2Glc] <sup>-</sup> ,<br>459.3828[M-H-Xyl/Ara-3Glc] <sup>-</sup>                                                                                                     | Ginsenoside Rc<br>isomer/Ginsenoside<br>Rb <sub>2</sub><br>isomer/Ginsenoside<br>Rb <sub>3</sub> isomer |
| R384 | 20.13 | C <sub>54</sub> H <sub>90</sub> O <sub>24</sub> | 1121.5736 | -0.71 | 1077.5930[M-H-CO <sub>2</sub> ] <sup>-</sup> ,<br>945.5456[M-H-Glu A] <sup>-</sup> ,<br>783.4904[M-H-Glu A-Glc] <sup>-</sup> ,<br>621.4372[M-H-Glu A-2Glc] <sup>-</sup> ,<br>459.3824[M-H-Glu A-3Glc] <sup>-</sup>                                                           | Protopanaxadiol+Gl<br>u A+3Glc                                                                          |
| R385 | 20.16 | C <sub>48</sub> H <sub>76</sub> O <sub>19</sub> | 955.4908  | 0.52  | 793.4373[M-H-Glc] <sup>-</sup> ,<br>731.4371[M-H-Glc-CO <sub>2</sub> -H <sub>2</sub> O] <sup>-</sup> ,<br>613.3723[M-H-2Glc-H <sub>2</sub> O] <sup>-</sup> ,<br>569.3849[M-H-2Glc-H <sub>2</sub> O-CO <sub>2</sub> ] <sup>-</sup> ,<br>455.3546[M-H-2Glc-Glu A] <sup>-</sup> | Ginsenoside Ro<br>isomer                                                                                |
| R386 | 20.16 | C <sub>42</sub> H <sub>66</sub> O <sub>14</sub> | 793.4380  | 0.76  | 631.3845[M-H-Glc] <sup>-</sup> ,<br>613.3694[M-H-Glc-H <sub>2</sub> O] <sup>-</sup> ,<br>569.3824[M-H-Glc-H <sub>2</sub> O-CO <sub>2</sub> ] <sup>-</sup> ,<br>455.3539[M-H-Glc-Glu A] <sup>-</sup>                                                                          | Chikusetsusaponin<br>Iva isomer                                                                         |
| R387 | 20.20 | C <sub>56</sub> H <sub>92</sub> O <sub>25</sub> | 1163.5840 | -0.77 | 1077.5858[M-H-Malonyl] <sup>-</sup> ,<br>945.5435[M-H-Malonyl-Xyl] <sup>-</sup> ,<br>783.4874[M-H-Malonyl-Xyl-Glc] <sup>-</sup> ,<br>621.4385[M-H-Malonyl-Xyl-2Glc] <sup>-</sup>                                                                                             | Malonyl-ginsenosid<br>e<br>Rc/Malonyl-ginseno<br>side<br>Rb <sub>2</sub> /Malonyl-ginsen                |

|      |       |                                                 |           |       |                                                                                                                                                                                                                                                                                   |                                                                                             |
|------|-------|-------------------------------------------------|-----------|-------|-----------------------------------------------------------------------------------------------------------------------------------------------------------------------------------------------------------------------------------------------------------------------------------|---------------------------------------------------------------------------------------------|
|      |       |                                                 |           |       | 459.3840[M-H-Malonyl-Xyl-3Glc] <sup>-</sup>                                                                                                                                                                                                                                       | oside Rb <sub>3</sub>                                                                       |
| R388 | 20.21 | C <sub>50</sub> H <sub>82</sub> O <sub>19</sub> | 985.5356  | -1.62 | 943.5279[M-H-Ac] <sup>-</sup> ,<br>781.4781[M-H-Ac-Glc] <sup>-</sup> ,<br>619.4225[M-H-Ac-2Glc] <sup>-</sup> ,<br>457.3687[M-H-Ac-3Glc] <sup>-</sup>                                                                                                                              | Dehydrated-protopanaxatriol+2Glc+Acetyl Glc                                                 |
| R389 | 20.22 | C <sub>50</sub> H <sub>84</sub> O <sub>19</sub> | 987.5529  | 0.00  | 945.5433[M-H-Ac] <sup>-</sup> ,<br>783.4898[M-H-Ac-Glc] <sup>-</sup> ,<br>621.4373[M-H-Ac-2Glc] <sup>-</sup> ,<br>459.3843[M-H-Ac-3Glc] <sup>-</sup>                                                                                                                              | Acetyl-ginsenoside Rd                                                                       |
| R390 | 20.22 | C <sub>42</sub> H <sub>72</sub> O <sub>14</sub> | 799.4855  | 1.38  | 637.4311[M-H-Glc] <sup>-</sup> ,<br>475.3783[M-H-2Glc] <sup>-</sup>                                                                                                                                                                                                               | Ginsenoside Rf isomer                                                                       |
| R391 | 20.22 | C <sub>53</sub> H <sub>86</sub> O <sub>22</sub> | 1073.5514 | -1.68 | 945.5403[M-H-Malonyl-Ac] <sup>-</sup> ,<br>783.4893[M-H-Malonyl-Ac-Glc] <sup>-</sup> ,<br>621.4393[M-H-Malonyl-Ac-2Glc] <sup>-</sup> ,<br>459.3838[M-H-Malonyl-Ac-3Glc] <sup>-</sup>                                                                                              | Acetyl malonyl-ginsenoside Rd                                                               |
| R392 | 20.22 | C <sub>55</sub> H <sub>86</sub> O <sub>22</sub> | 1097.5515 | -1.55 | 1011.4634[M-H-Malonyl] <sup>-</sup> ,<br>943.5273[M-H-Malonyl-(E)-but-2-enoyl] <sup>-</sup> ,<br>781.4724[M-H-Malonyl-(E)-but-2-enoyl-Glc] <sup>-</sup> ,<br>619.4225[M-H-Malonyl-(E)-but-2-enoyl-2Glc] <sup>-</sup> ,<br>457.3666[M-H-Malonyl-(E)-but-2-enoyl-3Glc] <sup>-</sup> | Dehydrated-protopanaxatriol+3Glc+Malonyl+(E)-but-2-enoyl                                    |
| R393 | 20.24 | C <sub>53</sub> H <sub>90</sub> O <sub>22</sub> | 1077.5870 | 2.32  | 945.5370[M-H-Xyl/Ara] <sup>-</sup> ,<br>783.4865[M-H-Xyl/Ara-Glc] <sup>-</sup> ,<br>621.4413[M-H-Xyl/Ara-2Glc] <sup>-</sup> ,<br>459.3839[M-H-Xyl/Ara-3Glc] <sup>-</sup>                                                                                                          | Ginsenoside Rc isomer/Ginsenoside Rb <sub>2</sub> isomer/Ginsenoside Rb <sub>3</sub> isomer |
| R394 | 20.25 | C <sub>56</sub> H <sub>94</sub> O <sub>24</sub> | 1149.6073 | 1.39  | 1107.5934[M-H-Ac] <sup>-</sup> ,<br>945.5349[M-H-Ac-Glc] <sup>-</sup> ,<br>783.4432[M-H-Ac-2Glc] <sup>-</sup>                                                                                                                                                                     | Quinquenoside R <sub>1</sub> isomer                                                         |

|      |       |                                                  |           |       |                                                                                                                                                                                                           |                                                                                                                   |
|------|-------|--------------------------------------------------|-----------|-------|-----------------------------------------------------------------------------------------------------------------------------------------------------------------------------------------------------------|-------------------------------------------------------------------------------------------------------------------|
|      |       |                                                  |           |       | 621.4408[M-H-Ac-3Glc],<br>459.3830[M-H-Ac-4Glc] <sup>-</sup>                                                                                                                                              |                                                                                                                   |
| R395 | 20.25 | C <sub>42</sub> H <sub>66</sub> O <sub>14</sub>  | 793.4375  | 0.13  | 631.3785[M-H-Glc],<br>455.3568[M-H-Glc-Glu A] <sup>-</sup>                                                                                                                                                | Chikusetsusaponin<br>Iva                                                                                          |
| R396 | 20.28 | C <sub>60</sub> H <sub>100</sub> O <sub>27</sub> | 1251.6399 | 2.00  | 1209.6232[M-H-Ac],<br>1077.5782[M-H-Ac-Xyl],<br>945.5428[M-H-Ac-Xyl-ara(p)],<br>783.4841[M-H-Ac-Xyl- ara(p)-Glc],<br>621.4386[M-H-Ac-Xyl- ara(p)-2Glc],<br>459.3860[M-H-Ac-Xyl- ara(p)-3Glc] <sup>-</sup> | Ginsenoside Ra <sub>5</sub>                                                                                       |
| R397 | 20.29 | C <sub>52</sub> H <sub>80</sub> O <sub>20</sub>  | 1023.5171 | 0.59  | 955.4908[M-H-(E)-but-2-enoyl],<br>793.4405[M-H-(E)-but-2-enoyl-Glc],<br>455.3537[M-H-(E)-but-2-enoyl-2Glc-Gl<br>u A] <sup>-</sup>                                                                         | (E)-But-2-enoyl<br>ginsenoside Ro                                                                                 |
| R398 | 20.31 | C <sub>61</sub> H <sub>102</sub> O <sub>28</sub> | 1281.6474 | -0.39 | 1239.6392[M-H-Ac],<br>1107.5917[M-H-Ac-Xyl/Ara],<br>945.5443[M-H-Ac-Xyl/Ara-Glc],<br>783.4888[M-H-Ac-Xyl/Ara-2Glc],<br>621.4402[M-H-Ac-Xyl/Ara-3Glc],<br>459.3836[M-H-Ac-Xyl/Ara-4Glc] <sup>-</sup>       | Acetyl-ginsenoside<br>Ra <sub>3</sub> /Acetyl-notogins<br>enoside R <sub>4</sub>                                  |
| R399 | 20.34 | C <sub>56</sub> H <sub>92</sub> O <sub>25</sub>  | 1163.5846 | -0.26 | 1077.5853[M-H-Malonyl],<br>945.5468[M-H-Malonyl-Xyl],<br>783.4906[M-H-Malonyl-Xyl-Glc],<br>621.4352[M-H-Malonyl-Xyl-2Glc],<br>459.3855[M-H-Malonyl-Xyl-3Glc] <sup>-</sup>                                 | Malonyl-ginsenosid<br>e<br>Rc/Malonyl-ginseno<br>side<br>Rb <sub>2</sub> /Malonyl-ginsen<br>oside Rb <sub>3</sub> |
| R400 | 20.36 | C <sub>54</sub> H <sub>85</sub> O <sub>24</sub>  | 1117.5428 | -0.27 | 945.5454[M-H-2Malonyl],<br>783.4838[M-H-2Malonyl-Glc],<br>621.4314[M-H-2Malonyl-2Glc],<br>459.3779[M-H-2Malonyl-3Glc] <sup>-</sup>                                                                        | Di-malonyl-ginseno<br>side Rd isomer                                                                              |

|      |       |                                                 |                        |       |                                                                                                                                                                                                                                                                                                                                                                                                                                 |                                          |
|------|-------|-------------------------------------------------|------------------------|-------|---------------------------------------------------------------------------------------------------------------------------------------------------------------------------------------------------------------------------------------------------------------------------------------------------------------------------------------------------------------------------------------------------------------------------------|------------------------------------------|
| R401 | 20.38 | C <sub>55</sub> H <sub>92</sub> O <sub>23</sub> | 1119.5958              | 0.36  | 1077.5853[M-H-Ac] <sup>-</sup> ,<br>945.5424[M-H-Ac-Ara(f)] <sup>-</sup> ,<br>783.4914[M-H-Ac-Ara(f)-Glc] <sup>-</sup> ,<br><br>621.4385[M-H-Ac-Ara(f)-2Glc] <sup>-</sup> ,<br>459.3856[M-H-Ac-Ara(f)-3Glc] <sup>-</sup>                                                                                                                                                                                                        | Ginsenoside Rs <sub>2</sub> <sup>a</sup> |
| R402 | 20.40 | C <sub>54</sub> H <sub>92</sub> O <sub>23</sub> | 1107.5929              | -1.99 | 945.5450[M-H-Glc] <sup>-</sup> ,<br>783.4948[M-H-2Glc] <sup>-</sup> ,<br>621.4366[M-H-3Glc] <sup>-</sup> ,<br>459.3872[M-H-4Glc] <sup>-</sup>                                                                                                                                                                                                                                                                                   | Ginsenoside Rb <sub>1</sub><br>isomer    |
| R403 | 20.43 | C <sub>53</sub> H <sub>86</sub> O <sub>22</sub> | 1073.5518              | -1.30 | 945.5427[M-H-Malonyl-Ac] <sup>-</sup> ,<br>783.4915[M-H-Malonyl-Ac-Glc] <sup>-</sup> ,<br>621.4370[M-H-Malonyl-Ac-2Glc] <sup>-</sup> ,<br>459.3838[M-H-Malonyl-Ac-3Glc] <sup>-</sup>                                                                                                                                                                                                                                            | Acetyl<br>malonyl-ginsenosid<br>e Rd     |
| R404 | 20.44 | C <sub>51</sub> H <sub>78</sub> O <sub>22</sub> | 1041.4911              | 0.48  | 997.4968[M-H-CO <sub>2</sub> ] <sup>-</sup> ,<br>835.4471[M-H-CO <sub>2</sub> -Glc] <sup>-</sup> ,<br>793.4371[M-H-Malonyl-Glc] <sup>-</sup> ,<br>731.4387[M-H-Malonyl-Glc-CO <sub>2</sub> -H <sub>2</sub> O] <sup>-</sup> ,<br>,<br>613.3772[M-H-Malonyl-2Glc-H <sub>2</sub> O] <sup>-</sup> ,<br>569.3847[M-H-Malonyl-2Glc-H <sub>2</sub> O-CO <sub>2</sub> ] <sup>-</sup> ,<br>455.3516[M-H-Malonyl-2Glc-Glu A] <sup>-</sup> | Malonyl-ginsenosid<br>e Ro               |
| R405 | 20.46 | C <sub>50</sub> H <sub>78</sub> O <sub>20</sub> | 1041.5047 <sup>b</sup> | -1.53 | 793.4395[M-H-Ac-Glc] <sup>-</sup> ,<br>731.4311[M-H-Ac-Glc-CO <sub>2</sub> -H <sub>2</sub> O] <sup>-</sup> ,<br>613.3771[M-H-Ac-2Glc-H <sub>2</sub> O] <sup>-</sup> ,<br>569.3856[M-H-Ac-2Glc-H <sub>2</sub> O-CO <sub>2</sub> ] <sup>-</sup> ,<br>455.3533[M-H-Ac-2Glc-Glu A] <sup>-</sup>                                                                                                                                     | Acetyl-ginsenoside<br>Ro                 |
| R406 | 20.47 | C <sub>48</sub> H <sub>82</sub> O <sub>18</sub> | 945.5446               | 2.33  | 783.4901[M-H-Glc] <sup>-</sup> ,<br>621.4373[M-H-2Glc] <sup>-</sup> ,<br>459.3842[M-H-3Glc] <sup>-</sup>                                                                                                                                                                                                                                                                                                                        | Ginsenoside Rd <sup>a</sup>              |

|      |       |                                                 |                        |       |                                                                                                                                                                                                                                                                                                                                   |                                                                                                                   |
|------|-------|-------------------------------------------------|------------------------|-------|-----------------------------------------------------------------------------------------------------------------------------------------------------------------------------------------------------------------------------------------------------------------------------------------------------------------------------------|-------------------------------------------------------------------------------------------------------------------|
| R407 | 20.49 | C <sub>51</sub> H <sub>78</sub> O <sub>22</sub> | 1041.4917 <sup>b</sup> | 1.06  | 997.5104[M-H-CO <sub>2</sub> ],<br>835.4457[M-H-CO <sub>2</sub> -Glc],<br>793.4380[M-H-Malonyl-Glc],<br>731.4377[M-H-Malonyl-Glc-CO <sub>2</sub> -H <sub>2</sub> O]<br>,<br>613.3754 [M-H-Malonyl-2Glc-H <sub>2</sub> O],<br>569.3849[M-H-Malonyl-2Glc-H <sub>2</sub> O-CO <sub>2</sub><br>],<br>455.3526[M-H-Malonyl-2Glc-Glu A] | Malonyl-ginsenosid<br>e Ro                                                                                        |
| R408 | 20.50 | C <sub>57</sub> H <sub>94</sub> O <sub>25</sub> | 1177.6014              | 0.68  | 1091.5942[M-H-Malonyl],<br>945.5306[M-H-Malonyl-Rha],<br>783.5013[M-H-Malonyl-Rha-Glc],<br>621.4434[M-H-Malonyl-Rha-2Glc],<br>459.3832[M-H-Malonyl-Rha-3Glc]                                                                                                                                                                      | Protopanaxadiol+<br>Rha+2Glc+ Malonyl<br>Glc                                                                      |
| R409 | 20.51 | C <sub>56</sub> H <sub>92</sub> O <sub>25</sub> | 1163.5844              | -0.43 | 1077.5852[M-H-Malonyl],<br>945.5432[M-H-Malonyl-Xyl],<br>783.4932[M-H-Malonyl-Xyl-Glc],<br>621.4381[M-H-Malonyl-Xyl-2Glc],<br>459.3842[M-H-Malonyl-Xyl-3Glc]                                                                                                                                                                      | Malonyl-ginsenosid<br>e<br>Rc/Malonyl-ginseno<br>side<br>Rb <sub>2</sub> /Malonyl-ginsen<br>oside Rb <sub>3</sub> |
| R410 | 20.51 | C <sub>42</sub> H <sub>66</sub> O <sub>14</sub> | 793.4380               | 0.76  | 631.3845[M-H-Glc],<br>455.3537[M-H-Glc-Glu A]                                                                                                                                                                                                                                                                                     | Chikusetsusaponin<br>Iva isomer                                                                                   |
| R411 | 20.56 | C <sub>54</sub> H <sub>92</sub> O <sub>23</sub> | 1107.5964              | 1.17  | 945.5460[M-H-Glc],<br>783.4965[M-H-2Glc],<br>621.4393[M-H-3Glc],<br>459.3831[M-H-4Glc]                                                                                                                                                                                                                                            | Ginsenoside Rb <sub>1</sub><br>isomer                                                                             |
| R412 | 20.57 | C <sub>57</sub> H <sub>94</sub> O <sub>26</sub> | 1193.5935              | -1.68 | 1107.5872[M-H-Malonyl],<br>945.5467[M-H-Malonyl-Glc],<br>783.4908[M-H-Malonyl-2Glc],<br>621.4413[M-H-Malonyl-3Glc],<br>459.3840[M-H-Malonyl-4Glc]                                                                                                                                                                                 | Malonyl-ginsenosid<br>e Rb <sub>1</sub> isomer                                                                    |

|      |       |                                                  |           |       |                                                                                                                                                                                                                             |                                                                                                                   |
|------|-------|--------------------------------------------------|-----------|-------|-----------------------------------------------------------------------------------------------------------------------------------------------------------------------------------------------------------------------------|-------------------------------------------------------------------------------------------------------------------|
| R413 | 20.58 | C <sub>62</sub> H <sub>102</sub> O <sub>29</sub> | 1309.6423 | -0.46 | 1223.6443[M-H-Malonyl],<br>1077.5836[M-H-Malonyl-Rha],<br>945.5417[M-H-Malonyl-Rha-Xyl/Ara],<br>783.4929[M-H-Malonyl-Rha-Xyl/Ara-Glc],<br>621.4376[M-H-Malonyl-Rha-Xyl/Ara-2Glc],<br>459.3863[M-H-Malonyl-Rha-Xyl/Ara-3Glc] | Protopanaxadiol+<br>Rha+Xyl/Ara+2Glc+<br>Malonyl Glc                                                              |
| R414 | 20.60 | C <sub>51</sub> H <sub>84</sub> O <sub>21</sub>  | 1031.5428 | 0.10  | 945.5450[M-H-Malonyl],<br>783.4902[M-H-Malonyl-Glc],<br>621.4332[M-H-Malonyl-2Glc],<br>459.3843[M-H-Malonyl-3Glc]                                                                                                           | Malonyl-ginsenosid<br>e Rd isomer                                                                                 |
| R415 | 20.63 | C <sub>52</sub> H <sub>86</sub> O <sub>20</sub>  | 1029.5641 | 0.68  | 945.5451[M-H-2Ac],<br>783.4882[M-H-2Ac-Glc],<br>621.4320[M-H-2Ac-2Glc],<br>459.3834[M-H-2Ac-3Glc]                                                                                                                           | Acetyl-pseudoginse<br>noside RC <sub>1</sub>                                                                      |
| R416 | 20.69 | C <sub>56</sub> H <sub>92</sub> O <sub>25</sub>  | 1163.5850 | 0.09  | 1077.5864[M-H-Malonyl],<br>945.5447[M-H-Malonyl-Xyl],<br>783.4913[M-H-Malonyl-Xyl-Glc],<br>621.4382[M-H-Malonyl-Xyl-2Glc],<br>459.3841[M-H-Malonyl-Xyl-3Glc]                                                                | Malonyl-ginsenosid<br>e<br>Rc/Malonyl-ginseno<br>side<br>Rb <sub>2</sub> /Malonyl-ginsen<br>oside Rb <sub>3</sub> |
| R417 | 20.69 | C <sub>57</sub> H <sub>94</sub> O <sub>25</sub>  | 1177.6024 | 1.53  | 1091.5985[M-H-Malonyl],<br>945.5323[M-H-Malonyl-Rha],<br>783.4916[M-H-Malonyl-Rha-Glc],<br>621.4364[M-H-Malonyl-Rha-2Glc],<br>459.3833[M-H-Malonyl-Rha-3Glc]                                                                | Protopanaxadiol+<br>Rha+2Glc+ Malonyl<br>Glc                                                                      |
| R418 | 20.69 | C <sub>52</sub> H <sub>84</sub> O <sub>20</sub>  | 1027.5476 | -0.19 | 943.5278[M-H-2Ac],<br>925.5139[M-H-2Ac-H <sub>2</sub> O],<br>781.4760[M-H-2Ac-Glc],<br>763.4612[M-H-2Ac-Glc-H <sub>2</sub> O],                                                                                              | Dehydrated-protop<br>anaxatriol+2Acetyl+<br>3Glc                                                                  |

|      |       |                                                  |           |       |                                                                                                                                                                                                                                                                                  |                                                                                                         |
|------|-------|--------------------------------------------------|-----------|-------|----------------------------------------------------------------------------------------------------------------------------------------------------------------------------------------------------------------------------------------------------------------------------------|---------------------------------------------------------------------------------------------------------|
|      |       |                                                  |           |       | 619.4198[M-H-2Ac-2Glc] <sup>-</sup> ,<br>457.3698[M-H-2Ac-3Glc] <sup>-</sup>                                                                                                                                                                                                     |                                                                                                         |
| R419 | 20.70 | C <sub>60</sub> H <sub>100</sub> O <sub>27</sub> | 1251.6403 | 2.32  | 1209.6299[M-H-Ac] <sup>-</sup> ,<br>1077.5831[M-H-Ac-Xyl] <sup>-</sup> ,<br>945.5436[M-H-Ac-Xyl- ara(p)] <sup>-</sup> ,<br>783.4929[M-H-Ac-Xyl- ara(p)-Glc] <sup>-</sup> ,<br>621.4393[M-H-Ac-Xyl- ara(p)-2Glc] <sup>-</sup> ,<br>459.3872[M-H-Ac-Xyl- ara(p)-3Glc] <sup>-</sup> | Ginsenoside Ra <sub>5</sub><br>isomer                                                                   |
| R420 | 20.70 | C <sub>56</sub> H <sub>94</sub> O <sub>24</sub>  | 1149.6053 | -0.35 | 1107.5966[M-H-Ac] <sup>-</sup> ,<br>945.5464[M-H-Ac-Glc] <sup>-</sup> , 783.4889<br>[M-H-Ac-2Glc] <sup>-</sup> ,<br>621.4332[M-H-Ac-3Glc] <sup>-</sup> ,<br>459.3873[M-H-Ac-4Glc] <sup>-</sup>                                                                                   | Quinquenoside Ri<br>isomer                                                                              |
| R421 | 20.70 | C <sub>53</sub> H <sub>88</sub> O <sub>23</sub>  | 1091.5658 | 1.83  | 945.5308[M-H-Rha] <sup>-</sup> ,<br>783.4868[M-H-Rha-Glc] <sup>-</sup> ,<br>621.4352[M-H-Rha-2Glc] <sup>-</sup> ,<br>459.3866[M-H-Rha-3Glc] <sup>-</sup>                                                                                                                         | Protopanaxadiol+R<br>ha+3Glc                                                                            |
| R422 | 20.75 | C <sub>53</sub> H <sub>90</sub> O <sub>22</sub>  | 1077.5868 | 2.13  | 945.5454[M-H-Xyl/Ara] <sup>-</sup> ,<br>783.4930[M-H-Xyl/Ara-Glc] <sup>-</sup> ,<br>621.4349[M-H-Xyl/Ara-2Glc] <sup>-</sup> ,<br>459.3842[M-H-Xyl/Ara-3Glc] <sup>-</sup>                                                                                                         | Ginsenoside Rc<br>isomer/Ginsenoside<br>Rb <sub>2</sub><br>isomer/Ginsenoside<br>Rb <sub>3</sub> isomer |
| R423 | 20.75 | C <sub>51</sub> H <sub>84</sub> O <sub>21</sub>  | 1031.5424 | -0.29 | 945.5437[M-H-Malonyl] <sup>-</sup> ,<br>783.4904[M-H-Malonyl-Glc] <sup>-</sup> ,<br>621.4370[M-H-Malonyl-2Glc] <sup>-</sup> ,<br>459.3864[M-H-Malonyl-3Glc] <sup>-</sup>                                                                                                         | Malonyl-ginsenosid<br>e Rd                                                                              |
| R424 | 20.76 | C <sub>48</sub> H <sub>76</sub> O <sub>18</sub>  | 939.4968  | 1.60  | 777.4389[M-H-Glc] <sup>-</sup> ,<br>715.4407[M-H-Glc-CO <sub>2</sub> -H <sub>2</sub> O] <sup>-</sup> ,<br>631.3880[M-H-Glc-Rha] <sup>-</sup> ,<br>613.3713[M-H-Glc-Rha-H <sub>2</sub> O] <sup>-</sup> ,<br>569.3848[M-H-Glc-Rha-H <sub>2</sub> O-CO <sub>2</sub> ] <sup>-</sup>  | Oleanolic aglycone+<br>Glc+Rha+Glu A                                                                    |



|      |       |                                                 |           |       |                                                                                                                                                                                                                      |                                            |
|------|-------|-------------------------------------------------|-----------|-------|----------------------------------------------------------------------------------------------------------------------------------------------------------------------------------------------------------------------|--------------------------------------------|
|      |       |                                                 |           |       | 455.3532[M-H-Glc-Rha-Glu A] <sup>-</sup>                                                                                                                                                                             |                                            |
| R425 | 20.85 | C <sub>54</sub> H <sub>85</sub> O <sub>24</sub> | 1117.5428 | -0.27 | 945.5441[M-H-2Malonyl] <sup>-</sup> ,<br>783.4751[M-H-2Malonyl-Glc] <sup>-</sup> ,<br>621.4387[M-H-2Malonyl-2Glc] <sup>-</sup> ,<br>459.3778[M-H-2Malonyl-3Glc] <sup>-</sup>                                         | Di-malonyl-ginsenoside Rd isomer           |
| R426 | 20.86 | C <sub>53</sub> H <sub>88</sub> O <sub>23</sub> | 1091.5620 | -1.65 | 945.5422[M-H-Rha] <sup>-</sup> ,<br>783.4988[M-H-Rha-Glc] <sup>-</sup> ,<br>621.4345[M-H-Rha-2Glc] <sup>-</sup> ,<br>459.3867[M-H-Rha-3Glc] <sup>-</sup>                                                             | Protopanaxadiol+Rha+3Glc                   |
| R427 | 20.87 | C <sub>38</sub> H <sub>64</sub> O <sub>10</sub> | 679.4432  | 1.62  | 475.3795[M-H-Ac-Glc] <sup>-</sup>                                                                                                                                                                                    | Protopanaxatriol+Acetyl Glc                |
| R428 | 20.91 | C <sub>51</sub> H <sub>84</sub> O <sub>21</sub> | 1031.5427 | 0.00  | 945.5433[M-H-Malonyl] <sup>-</sup> ,<br>783.4901[M-H-Malonyl-Glc] <sup>-</sup> ,<br>621.4374[M-H-Malonyl-2Glc] <sup>-</sup> ,<br>459.3849[M-H-Malonyl-3Glc] <sup>-</sup>                                             | Malonyl-ginsenoside Rd isomer              |
| R429 | 20.91 | C <sub>50</sub> H <sub>84</sub> O <sub>19</sub> | 987.5532  | 0.30  | 945.5436[M-H-Ac] <sup>-</sup> ,<br>783.4965[M-H-Ac-Glc] <sup>-</sup> ,<br>621.4378[M-H-Ac-2Glc] <sup>-</sup> ,<br>459.3877[M-H-Ac-3Glc] <sup>-</sup>                                                                 | Acetyl-ginsenoside Rd                      |
| R430 | 20.95 | C <sub>55</sub> H <sub>92</sub> O <sub>23</sub> | 1119.5951 | -0.27 | 1077.5840[M-H-Ac] <sup>-</sup> ,<br>945.5427[M-H-Ac-Ara(p)] <sup>-</sup> ,<br>783.4883[M-H-Ac-Ara(p)-Glc] <sup>-</sup> ,<br>621.4360[M-H-Ac-Ara(p)-2Glc] <sup>-</sup> ,<br>459.3837[M-H-Ac-Ara(p)-3Glc] <sup>-</sup> | Ginsenoside Rs <sub>2</sub> isomer         |
| R431 | 20.95 | C <sub>56</sub> H <sub>94</sub> O <sub>24</sub> | 1149.6058 | 0.09  | 1107.5840[M-H-Ac] <sup>-</sup> ,<br>945.5446[M-H-Ac-Glc] <sup>-</sup> ,<br>783.4883[M-H-Ac-2Glc] <sup>-</sup> ,<br>621.4358[M-H-Ac-3Glc] <sup>-</sup> ,<br>459.3831[M-H-Ac-4Glc] <sup>-</sup>                        | Quinquenoside R <sub>1</sub> isomer        |
| R432 | 20.98 | C <sub>57</sub> H <sub>94</sub> O <sub>26</sub> | 1193.5936 | -1.59 | 1107.6016[M-H-Malonyl] <sup>-</sup> ,<br>945.5438[M-H-Malonyl-Glc] <sup>-</sup> ,<br>783.4922[M-H-Malonyl-2Glc] <sup>-</sup> ,<br>621.4422[M-H-Malonyl-3Glc] <sup>-</sup>                                            | Malonyl-ginsenoside Rb <sub>1</sub> isomer |

|      |       |                                                  |                        |       |                                                                                                                                                                                                                                                                                                                                                                            |                                                                                  |
|------|-------|--------------------------------------------------|------------------------|-------|----------------------------------------------------------------------------------------------------------------------------------------------------------------------------------------------------------------------------------------------------------------------------------------------------------------------------------------------------------------------------|----------------------------------------------------------------------------------|
|      |       |                                                  |                        |       | 459.3853[M-H-Malonyl-4Glc] <sup>-</sup>                                                                                                                                                                                                                                                                                                                                    |                                                                                  |
| R433 | 20.98 | C <sub>47</sub> H <sub>74</sub> O <sub>18</sub>  | 925.4797               | 0.00  | 793.4382[M-H-Xyl/Ara] <sup>-</sup> ,<br>763.4349[M-H-Glc] <sup>-</sup> ,<br>613.3756[M-H-Xyl/Ara-Glc-H <sub>2</sub> O] <sup>-</sup> ,<br>455.3536[M-H-Xyl/Ara-Glc-Glu A] <sup>-</sup>                                                                                                                                                                                      | Pseudo-ginsenoside<br>-RT <sub>1</sub><br>isomer/Chikusetsus<br>aponin IV isomer |
| R434 | 20.99 | C <sub>51</sub> H <sub>82</sub> O <sub>21</sub>  | 1029.5279              | 0.00  | 943.5275[M-H-Malonyl] <sup>-</sup> ,<br>781.4807[M-H-Malonyl-Glc] <sup>-</sup> ,<br>763.4688[M-H-2Ac-Glc-H <sub>2</sub> O] <sup>-</sup> ,<br>619.4215[M-H-Malonyl-2Glc] <sup>-</sup> ,<br>457.3689[M-H-Malonyl-3Glc] <sup>-</sup>                                                                                                                                          | Dehydrated-protop<br>anaxatriol+Malonyl<br>Glc+2Glc                              |
| R435 | 21.03 | C <sub>54</sub> H <sub>92</sub> O <sub>23</sub>  | 1107.5936              | -1.35 | 945.5419[M-H-Glc] <sup>-</sup> ,<br>783.4886[M-H-2Glc] <sup>-</sup> ,<br>621.4385[M-H-3Glc] <sup>-</sup> ,<br>459.3854[M-H-4Glc] <sup>-</sup>                                                                                                                                                                                                                              | Ginsenoside Rb <sub>1</sub><br>isomer                                            |
| R436 | 21.05 | C <sub>53</sub> H <sub>88</sub> O <sub>23</sub>  | 1137.5692 <sup>b</sup> | 0.09  | 945.5434[M-H-Rha] <sup>-</sup> ,<br>783.4969[M-H-Rha-Glc] <sup>-</sup> ,<br>621.4361[M-H-Rha-2Glc] <sup>-</sup> ,<br>459.3797[M-H-Rha-3Glc] <sup>-</sup>                                                                                                                                                                                                                   | Protopanaxadiol+R<br>ha+3Glc                                                     |
| R437 | 21.11 | C <sub>62</sub> H <sub>102</sub> O <sub>27</sub> | 1277.6522              | -0.63 | 1209.6308[M-H-(E)-but-2-enoyl] <sup>-</sup> ,<br>1077.5751[M-H-(E)-but-2-enoyl-Xyl] <sup>-</sup> ,<br>945.5579[M-H-(E)-but-2-enoyl-Xyl-<br>ara(p)] <sup>-</sup> ,<br>783.4861[M-H-(E)-but-2-enoyl-Xyl-<br>ara(p)-Glc] <sup>-</sup> ,<br>621.4409[M-H-(E)-but-2-enoyl-Xyl-<br>ara(p)-2Glc] <sup>-</sup> ,<br>459.3841[M-H-(E)-but-2-enoyl-Xyl-<br>ara(p)-3Glc] <sup>-</sup> | Ginsenoside Ra <sub>4</sub><br>isomer                                            |
| R438 | 21.17 | C <sub>48</sub> H <sub>76</sub> O <sub>19</sub>  | 955.4912               | 0.94  | 793.4358[M-H-Glc] <sup>-</sup>                                                                                                                                                                                                                                                                                                                                             | Ginsenoside Ro                                                                   |

|      |       |                                                 |           |       |                                                                                                                                                                                                                                          |                                                              |
|------|-------|-------------------------------------------------|-----------|-------|------------------------------------------------------------------------------------------------------------------------------------------------------------------------------------------------------------------------------------------|--------------------------------------------------------------|
|      |       |                                                 |           |       | 731.4333[M-H-Glc-CO <sub>2</sub> -H <sub>2</sub> O] <sup>-</sup> ,<br>613.3773[M-H-2Glc-H <sub>2</sub> O] <sup>-</sup> ,<br>569.3846[M-H-2Glc-H <sub>2</sub> O-CO <sub>2</sub> ] <sup>-</sup> ,<br>455.3546[M-H-2Glc-Glu A] <sup>-</sup> | isomer                                                       |
| R439 | 21.19 | C <sub>44</sub> H <sub>74</sub> O <sub>14</sub> | 825.5000  | 0.00  | 783.4904[M-H-Ac] <sup>-</sup> ,<br>637.4363[M-H-Ac-Rha] <sup>-</sup> ,<br>619.4239[M-H-Ac-Rha-H <sub>2</sub> O] <sup>-</sup> ,<br>475.3794[M-H-Ac-Rha-Glc] <sup>-</sup>                                                                  | Acetyl-ginsenoside<br>Rg <sub>2</sub>                        |
| R440 | 21.20 | C <sub>57</sub> H <sub>94</sub> O <sub>26</sub> | 1193.5952 | -0.25 | 1107.5831[M-H-Malonyl] <sup>-</sup> ,<br>945.5392[M-H-Malonyl-Glc] <sup>-</sup> ,<br>783.4866[M-H-Malonyl-2Glc] <sup>-</sup> ,<br>621.4386[M-H-Malonyl-3Glc] <sup>-</sup> ,<br>459.3846[M-H-Malonyl-4Glc] <sup>-</sup>                   | Malonyl-ginsenoside Rb <sub>1</sub> isomer                   |
| R441 | 21.23 | C <sub>53</sub> H <sub>86</sub> O <sub>22</sub> | 1073.5526 | -0.56 | 945.5450[M-H-Malonyl-Ac] <sup>-</sup> ,<br>783.4891[M-H-Malonyl-Ac-Glc] <sup>-</sup> ,<br>621.4370[M-H-Malonyl-Ac-2Glc] <sup>-</sup> ,<br>459.3848[M-H-Malonyl-Ac-3Glc] <sup>-</sup>                                                     | Acetyl<br>malonyl-ginsenoside Rd                             |
| R442 | 21.23 | C <sub>54</sub> H <sub>85</sub> O <sub>24</sub> | 1117.5427 | -0.36 | 945.5416[M-H-2Malonyl] <sup>-</sup> ,<br>783.4908[M-H-2Malonyl-Glc] <sup>-</sup> ,<br>621.4375[M-H-2Malonyl-2Glc] <sup>-</sup> ,<br>459.3872[M-H-2Malonyl-3Glc] <sup>-</sup>                                                             | Di-malonyl-ginsenoside Rd                                    |
| R443 | 21.23 | C <sub>43</sub> H <sub>68</sub> O <sub>14</sub> | 807.4536  | 0.62  | 765.4451[M-H-Ac] <sup>-</sup> ,<br>603.3922[M-H-Ac-Glc] <sup>-</sup> ,<br>441.3367[M-H-Ac-2Glc] <sup>-</sup>                                                                                                                             | Dehydrated-protopanaxadiol+Acetyl<br>Glc+Glc                 |
| R444 | 21.25 | C <sub>52</sub> H <sub>86</sub> O <sub>20</sub> | 1029.5630 | -0.39 | 945.5422[M-H-2Ac] <sup>-</sup> ,<br>783.4902[M-H-2Ac-Glc] <sup>-</sup> ,<br>621.4365[M-H-2Ac-2Glc] <sup>-</sup> , 459.3865<br>[M-H-2Ac-3Glc] <sup>-</sup>                                                                                | Acetyl-pseudoginsenoside RC <sub>1</sub>                     |
| R445 | 21.25 | C <sub>47</sub> H <sub>74</sub> O <sub>18</sub> | 925.4801  | 0.43  | 793.4344[M-H-Xyl/Ara] <sup>-</sup> ,<br>731.4366[M-H-Xyl/Ara-CO <sub>2</sub> -H <sub>2</sub> O] <sup>-</sup> ,                                                                                                                           | Pseudo-ginsenoside<br>-RT <sub>1</sub><br>isomer/Chikusetsus |

|      |       |                                                 |           |       |                                                                                                                                                                                                                                              |                                                                                             |
|------|-------|-------------------------------------------------|-----------|-------|----------------------------------------------------------------------------------------------------------------------------------------------------------------------------------------------------------------------------------------------|---------------------------------------------------------------------------------------------|
|      |       |                                                 |           |       | 613.3762[M-H-Xyl/Ara-Glc-H <sub>2</sub> O] <sup>-</sup> ,<br>569.3815[M-H-Xyl/Ara-Glc-H <sub>2</sub> O-CO <sub>2</sub> ] <sup>-</sup> ,<br>455.3551[M-H-Xyl/Ara-Glc-Glu A] <sup>-</sup>                                                      | aponin IV isomer                                                                            |
| R446 | 21.33 | C <sub>43</sub> H <sub>68</sub> O <sub>14</sub> | 807.4531  | 0.00  | 765.4421[M-H-Ac] <sup>-</sup> ,<br>603.3807[M-H-Ac-Glc] <sup>-</sup> ,<br>441.3345[M-H-Ac-2Glc] <sup>-</sup>                                                                                                                                 | Dehydrated-protopanaxadiol+Acetyl Glc+Glc                                                   |
| R447 | 21.35 | C <sub>53</sub> H <sub>90</sub> O <sub>22</sub> | 1077.5837 | -0.74 | 945.5419[M-H-Xyl/Ara] <sup>-</sup> ,<br>783.4922[M-H-Xyl/Ara-Glc] <sup>-</sup> ,<br>621.4381[M-H-Xyl/Ara-2Glc] <sup>-</sup> ,<br>459.3848[M-H-Xyl/Ara-3Glc] <sup>-</sup>                                                                     | Ginsenoside Rc isomer/Ginsenoside Rb <sub>2</sub> isomer/Ginsenoside Rb <sub>3</sub> isomer |
| R448 | 21.35 | C <sub>57</sub> H <sub>94</sub> O <sub>26</sub> | 1193.5932 | -1.93 | 1107.5895[M-H-Malonyl] <sup>-</sup> ,<br>945.5457[M-H-Malonyl-Glc] <sup>-</sup> ,<br>783.4879[M-H-Malonyl-2Glc] <sup>-</sup> ,<br>621.4395[M-H-Malonyl-3Glc] <sup>-</sup> ,<br>459.3821[M-H-Malonyl-4Glc] <sup>-</sup>                       | Malonyl-ginsenoside Rb <sub>1</sub> isomer                                                  |
| R449 | 21.37 | C <sub>57</sub> H <sub>94</sub> O <sub>25</sub> | 1177.6016 | 0.85  | 1091.5903[M-H-Malonyl] <sup>-</sup> ,<br>945.5390[M-H-Malonyl-Rha] <sup>-</sup> ,<br>783.4928[M-H-Malonyl-Rha-Glc] <sup>-</sup> ,<br>621.4377[M-H-Malonyl-Rha-2Glc] <sup>-</sup> ,<br>459.3842[M-H-Malonyl-Rha-3Glc] <sup>-</sup>            | Protopanaxadiol+Rha+2Glc+ Malonyl Glc                                                       |
| R450 | 21.37 | C <sub>50</sub> H <sub>82</sub> O <sub>19</sub> | 985.5359  | -1.32 | 943.5255[M-H-Ac] <sup>-</sup> ,<br>781.4734[M-H-Ac-Glc] <sup>-</sup> ,<br>619.4212[M-H-Ac-2Glc] <sup>-</sup> ,<br>457.3695[M-H-Ac-3Glc] <sup>-</sup>                                                                                         | Dehydrated-protopanaxatriol+2Glc+Acetyl Glc                                                 |
| R451 | 21.37 | C <sub>52</sub> H <sub>80</sub> O <sub>20</sub> | 1023.5179 | 1.37  | 731.4371[M-H-(E)-but-2-enoyl-Glc-CO<br>2-H <sub>2</sub> O] <sup>-</sup> ,<br>613.3745[M-H-(E)-but-2-enoyl-2Glc-H <sub>2</sub><br>O] <sup>-</sup> ,<br>569.3858[M-H-(E)-but-2-enoyl-2Glc-H <sub>2</sub><br>O-CO <sub>2</sub> ] <sup>-</sup> , | (E)-But-2-enoyl ginsenoside Ro                                                              |

|      |       |                                                  |                       |       |                                                                                                                                                                                                                                                                                                                                                                                                           |                                                                                                                          |
|------|-------|--------------------------------------------------|-----------------------|-------|-----------------------------------------------------------------------------------------------------------------------------------------------------------------------------------------------------------------------------------------------------------------------------------------------------------------------------------------------------------------------------------------------------------|--------------------------------------------------------------------------------------------------------------------------|
|      |       |                                                  |                       |       | 455.3513[M-H-( <i>E</i> )-but-2-enoyl-2Glc-Gl<br>u A] <sup>+</sup>                                                                                                                                                                                                                                                                                                                                        |                                                                                                                          |
| R452 | 21.39 | C <sub>36</sub> H <sub>60</sub> O <sub>9</sub>   | 681.4221 <sup>b</sup> | 1.03  | 473.3669[M-H-Glc] <sup>+</sup>                                                                                                                                                                                                                                                                                                                                                                            | Ginsenoside Rh <sub>7</sub>                                                                                              |
| R453 | 21.41 | C <sub>58</sub> H <sub>96</sub> O <sub>24</sub>  | 1175.6238             | 2.13  | 1107.5961[M-H-( <i>E</i> )-but-2-enoyl] <sup>+</sup> ,<br>945.5278[M-H-( <i>E</i> )-but-2-enoyl-Glc] <sup>+</sup> ,<br>783.4851[M-H-( <i>E</i> )-but-2-enoyl-2Glc] <sup>+</sup> ,<br>621.4348[M-H-( <i>E</i> )-but-2-enoyl-3Glc] <sup>+</sup> ,<br>459.3815[M-H-( <i>E</i> )-but-2-enoyl-4Glc] <sup>+</sup>                                                                                               | Ginsenoside Ra <sub>6</sub>                                                                                              |
| R454 | 21.43 | C <sub>54</sub> H <sub>85</sub> O <sub>24</sub>  | 1117.5428             | -0.27 | 945.5416[M-H-2Malonyl] <sup>+</sup> ,<br>783.4908[M-H-2Malonyl-Glc] <sup>+</sup> ,<br>621.4375[M-H-2Malonyl-2Glc] <sup>+</sup> ,<br>459.3872[M-H-2Malonyl-3Glc] <sup>+</sup>                                                                                                                                                                                                                              | Di-malonyl-ginseno<br>side Rd isomer                                                                                     |
| R455 | 21.44 | C <sub>60</sub> H <sub>100</sub> O <sub>27</sub> | 1251.6401             | 2.16  | 1209.6194[M-H-Ac] <sup>+</sup> ,<br>1077.5831[M-H-Ac-Xyl] <sup>+</sup> ,<br>945.5413[M-H-Ac-Xyl- ara(p)] <sup>+</sup> ,<br>783.4884[M-H-Ac-Xyl- ara(p)-Glc] <sup>+</sup> ,<br>621.4351[M-H-Ac-Xyl- ara(p)-2Glc] <sup>+</sup> ,<br>459.3881[M-H-Ac-Xyl- ara(p)-3Glc] <sup>+</sup>                                                                                                                          | Ginsenoside Ra <sub>5</sub><br>isomer                                                                                    |
| R456 | 21.49 | C <sub>63</sub> H <sub>104</sub> O <sub>28</sub> | 1307.6643             | 0.54  | 1239.6508[M-H-( <i>E</i> )-but-2-enoyl] <sup>+</sup> ,<br>1107.5946[M-H-( <i>E</i> )-but-2-enoyl-Glc] <sup>+</sup> ,<br>945.5443[M-H-( <i>E</i> )-but-2-enoyl-Glc-Xyl<br>] <sup>+</sup> ,<br>783.4894[M-H-( <i>E</i> )-but-2-enoyl-2Glc-Xy<br>l] <sup>+</sup> ,<br>621.4363[M-H-( <i>E</i> )-but-2-enoyl-3Glc-Xy<br>l] <sup>+</sup> ,<br>459.3818[M-H-( <i>E</i> )-but-2-enoyl-4Glc-Xy<br>l] <sup>+</sup> | ( <i>E</i> )-But-2-enoyl-gins<br>enoside<br>Ra <sub>3</sub> /( <i>E</i> )-But-2-enoyl-<br>notoginsenoside R <sub>4</sub> |
| R457 | 21.50 | C <sub>46</sub> H <sub>76</sub> O <sub>15</sub>  | 867.5114              | 0.92  | 799.4860[M-H-( <i>E</i> )-but-2-enoyl] <sup>+</sup> ,<br>637.4326[M-H-( <i>E</i> )-but-2-enoyl-Glc] <sup>+</sup> ,<br>475.3796[M-H-( <i>E</i> )-but-2-enoyl-2Glc] <sup>+</sup>                                                                                                                                                                                                                            | Koryoginsenoside<br>R <sub>1</sub> /Ginsenoside Re <sub>6</sub>                                                          |
| R458 | 21.54 | C <sub>48</sub> H <sub>82</sub> O <sub>18</sub>  | 945.5416              | -0.74 | 783.4871[M-H-Glc] <sup>+</sup>                                                                                                                                                                                                                                                                                                                                                                            | Ginsenoside Rd                                                                                                           |

|      |       |                                                 |           |       |                                                                                                                                                                                                                      |                                              |
|------|-------|-------------------------------------------------|-----------|-------|----------------------------------------------------------------------------------------------------------------------------------------------------------------------------------------------------------------------|----------------------------------------------|
|      |       |                                                 |           |       | 621.4375[M-H-2Glc] <sup>-</sup> ,<br>459.3847[M-H-3Glc] <sup>-</sup>                                                                                                                                                 | isomer                                       |
| R459 | 21.54 | C <sub>55</sub> H <sub>92</sub> O <sub>23</sub> | 1119.5946 | -0.71 | 1077.5846[M-H-Ac] <sup>-</sup> ,<br>945.5458[M-H-Ac-Ara(p)] <sup>-</sup> ,<br>783.4878[M-H-Ac-Ara(p)-Glc] <sup>-</sup> ,<br>621.4374[M-H-Ac-Ara(p)-2Glc] <sup>-</sup> ,<br>459.3867[M-H-Ac-Ara(p)-3Glc] <sup>-</sup> | Ginsenoside Rs <sub>2</sub><br>isomer        |
| R460 | 21.55 | C <sub>50</sub> H <sub>84</sub> O <sub>19</sub> | 987.5530  | 0.10  | 945.5439[M-H-Ac] <sup>-</sup> ,<br>783.4905[M-H-Ac-Glc] <sup>-</sup> ,<br>621.4355[M-H-Ac-2Glc] <sup>-</sup> ,<br>459.3843 [M-H-Ac-3Glc] <sup>-</sup>                                                                | Acetyl-ginsenoside<br>Rd                     |
| R461 | 21.57 | C <sub>52</sub> H <sub>86</sub> O <sub>20</sub> | 1029.5638 | 0.39  | 945.5418[M-H-2Ac] <sup>-</sup> ,<br>783.4908[M-H-2Ac-Glc] <sup>-</sup> ,<br>621.4369[M-H-2Ac-2Glc] <sup>-</sup> ,<br>459.3848[M-H-2Ac-3Glc] <sup>-</sup>                                                             | Acetyl-pseudoginse<br>noside RC <sub>1</sub> |
| R462 | 21.67 | C <sub>54</sub> H <sub>92</sub> O <sub>23</sub> | 1107.5967 | 1.44  | 945.5404[M-H-Glc] <sup>-</sup> ,<br>783.4837[M-H-2Glc] <sup>-</sup> ,<br>621.4324[M-H-3Glc] <sup>-</sup> ,<br>459.3803[M-H-4Glc] <sup>-</sup>                                                                        | Ginsenoside Rb <sub>1</sub><br>isomer        |
| R463 | 21.70 | C <sub>42</sub> H <sub>72</sub> O <sub>13</sub> | 783.4887  | -1.02 | 475.3744[M-H-Rha-Glc] <sup>-</sup>                                                                                                                                                                                   | Ginsenoside Rg <sub>2</sub><br>isomer        |
| R464 | 21.70 | C <sub>53</sub> H <sub>88</sub> O <sub>23</sub> | 1091.5622 | -1.47 | 945.5419[M-H-Rha] <sup>-</sup> ,<br>783.4901[M-H-Rha-Glc] <sup>-</sup> ,<br>621.4414[M-H-Rha-2Glc] <sup>-</sup> ,<br>459.3853[M-H-Rha-3Glc] <sup>-</sup>                                                             | Protopanaxadiol+R<br>ha+3Glc                 |
| R465 | 21.71 | C <sub>51</sub> H <sub>84</sub> O <sub>21</sub> | 1031.5426 | -0.10 | 945.5422[M-H-Malonyl] <sup>-</sup> ,<br>783.4875[M-H-Malonyl-Glc] <sup>-</sup> ,<br>621.4376[M-H-Malonyl-2Glc] <sup>-</sup> ,<br>459.3843[M-H-Malonyl-3Glc] <sup>-</sup>                                             | Malonyl-ginsenosid<br>e Rd isomer            |
| R466 | 21.73 | C <sub>55</sub> H <sub>92</sub> O <sub>23</sub> | 1119.5942 | -1.07 | 1077.5846[M-H-Ac] <sup>-</sup> ,<br>945.5414[M-H-Ac-Ara(p)] <sup>-</sup> ,<br>783.4888[M-H-Ac-Ara(p)-Glc] <sup>-</sup>                                                                                               | Ginsenoside Rs <sub>2</sub><br>isomer        |

|      |       |                                                 |           |       |                                                                                                                                                                                                        |                                                                                                         |
|------|-------|-------------------------------------------------|-----------|-------|--------------------------------------------------------------------------------------------------------------------------------------------------------------------------------------------------------|---------------------------------------------------------------------------------------------------------|
|      |       |                                                 |           |       | 621.4365[M-H-Ac-Ara(p)-2Glc],<br>459.3842[M-H-Ac-Ara(p)-3Glc] <sup>-</sup>                                                                                                                             |                                                                                                         |
| R467 | 21.74 | C <sub>58</sub> H <sub>96</sub> O <sub>24</sub> | 1175.6234 | 1.79  | 1107.5952[M-H-(E)-but-2-enoyl],<br>945.5443[M-H-(E)-but-2-enoyl-Glc],<br>783.4917[M-H-(E)-but-2-enoyl-2Glc],<br>621.4363[M-H-(E)-but-2-enoyl-3Glc],<br>459.3848[M-H-(E)-but-2-enoyl-4Glc] <sup>-</sup> | Ginsenoside Ra <sub>6</sub><br>isomer                                                                   |
| R468 | 21.78 | C <sub>53</sub> H <sub>88</sub> O <sub>23</sub> | 1091.5658 | 1.83  | 945.5442[M-H-Rha],<br>783.4897[M-H-Rha-Glc],<br>621.4383[M-H-Rha-2Glc],<br>459.3836[M-H-Rha-3Glc] <sup>-</sup>                                                                                         | Protopanaxadiol+R<br>ha+3Glc                                                                            |
| R469 | 21.82 | C <sub>47</sub> H <sub>78</sub> O <sub>17</sub> | 913.5122  | 1.84  | 781.4792[M-H-Xyl/Ara],<br>619.4233[M-H-Xyl/Ara-Glc],<br>457.3702[M-H-Xyl/Ara-2Glc] <sup>-</sup>                                                                                                        | Dehydrated-protop<br>anaxatriol+Xyl/Ara+<br>2Glc                                                        |
| R470 | 21.82 | C <sub>51</sub> H <sub>82</sub> O <sub>21</sub> | 1029.5277 | 0.68  | 943.5300[M-H-Malonyl],<br>781.4759[M-H-Malonyl-Glc],<br>763.4671[M-H-2Ac-Glc-H <sub>2</sub> O],<br>619.4210[M-H-Malonyl-2Glc],<br>457.3686[M-H-Malonyl-3Glc] <sup>-</sup>                              | Dehydrated-protop<br>anaxatriol+Malonyl<br>Glc+2Glc                                                     |
| R471 | 21.84 | C <sub>53</sub> H <sub>90</sub> O <sub>22</sub> | 1077.5825 | -1.86 | 945.5468[M-H-Xyl/Ara],<br>783.4909[M-H-Xyl/Ara-Glc],<br>621.4401[M-H-Xyl/Ara-2Glc],<br>459.3853[M-H-Xyl/Ara-3Glc] <sup>-</sup>                                                                         | Ginsenoside Rc<br>isomer/Ginsenoside<br>Rb <sub>2</sub><br>isomer/Ginsenoside<br>Rb <sub>3</sub> isomer |
| R472 | 21.84 | C <sub>53</sub> H <sub>86</sub> O <sub>22</sub> | 1073.5526 | -0.56 | 987.5481[M-H-Malonyl],<br>945.5444[M-H-Malonyl-Ac],<br>783.4901[M-H-Malonyl-Ac-Glc],<br>621.4376[M-H-Malonyl-Ac-2Glc],<br>459.3846[M-H-Malonyl-Ac-3Glc] <sup>-</sup>                                   | Acetyl<br>malonyl-ginsenosid<br>e Rd                                                                    |
| R473 | 21.85 | C <sub>52</sub> H <sub>86</sub> O <sub>20</sub> | 1029.5643 | 0.87  | 945.5439[M-H-2Ac],<br>783.4916[M-H-2Ac-Glc],                                                                                                                                                           | Acetyl-pseudoginse<br>noside RC <sub>1</sub>                                                            |

|      |       |                                                  |                        |       |                                                                                                                                                                                                                                                                                                                                                                            |                                                          |
|------|-------|--------------------------------------------------|------------------------|-------|----------------------------------------------------------------------------------------------------------------------------------------------------------------------------------------------------------------------------------------------------------------------------------------------------------------------------------------------------------------------------|----------------------------------------------------------|
|      |       |                                                  |                        |       | 621.4376[M-H-2Ac-2Glc] <sup>-</sup> ,<br>459.3840[M-H-2Ac-3Glc] <sup>-</sup>                                                                                                                                                                                                                                                                                               |                                                          |
| R474 | 21.86 | C <sub>62</sub> H <sub>102</sub> O <sub>27</sub> | 1277.6549              | 1.49  | 1209.6573[M-H-(E)-but-2-enoyl] <sup>-</sup> ,<br>1077.5818[M-H-(E)-but-2-enoyl-Xyl] <sup>-</sup> ,<br>945.5376[M-H-(E)-but-2-enoyl-Xyl-<br>ara(p)] <sup>-</sup> ,<br>783.4933[M-H-(E)-but-2-enoyl-Xyl-<br>ara(p)-Glc] <sup>-</sup> ,<br>621.4390[M-H-(E)-but-2-enoyl-Xyl-<br>ara(p)-2Glc] <sup>-</sup> ,<br>459.3856[M-H-(E)-but-2-enoyl-Xyl-<br>ara(p)-3Glc] <sup>-</sup> | Ginsenoside Ra <sub>4</sub>                              |
| R475 | 21.86 | C <sub>42</sub> H <sub>72</sub> O <sub>13</sub>  | 783.4908               | 1.66  | 475.3717[M-H-Rha-Glc] <sup>-</sup>                                                                                                                                                                                                                                                                                                                                         | Ginsenoside Rg <sub>2</sub><br>isomer                    |
| R476 | 21.87 | C <sub>50</sub> H <sub>84</sub> O <sub>19</sub>  | 987.5538               | 0.91  | 945.5443[M-H-Ac] <sup>-</sup> ,<br>783.4906[M-H-Ac-Glc] <sup>-</sup> ,<br>621.4380[M-H-Ac-2Glc] <sup>-</sup> , 459.3850<br>[M-H-Ac-3Glc] <sup>-</sup>                                                                                                                                                                                                                      | Acetyl-ginsenoside<br>Rd                                 |
| R477 | 21.89 | C <sub>51</sub> H <sub>84</sub> O <sub>21</sub>  | 1031.5430              | 0.29  | 945.5432[M-H-Malonyl] <sup>-</sup> ,<br>783.4888[M-H-Malonyl-Glc] <sup>-</sup> ,<br>621.4373[M-H-Malonyl-2Glc] <sup>-</sup> ,<br>459.3849[M-H-Malonyl-3Glc] <sup>-</sup>                                                                                                                                                                                                   | Malonyl-ginsenosid<br>e Rd isomer                        |
| R478 | 21.89 | C <sub>47</sub> H <sub>80</sub> O <sub>17</sub>  | 915.5320               | 0.33  | 621.4365[M-H-Xyl-Glc] <sup>-</sup> ,<br>459.3826[M-H-Xyl-2Glc] <sup>-</sup>                                                                                                                                                                                                                                                                                                | Vina-ginsenoside<br>R <sub>16</sub> isomer               |
| R479 | 21.92 | C <sub>57</sub> H <sub>94</sub> O <sub>26</sub>  | 1193.5929              | -2.18 | 1107.6017[M-H-Malonyl] <sup>-</sup> ,<br>945.5327[M-H-Malonyl-Glc] <sup>-</sup> ,<br>783.4842[M-H-Malonyl-2Glc] <sup>-</sup> ,<br>621.4359[M-H-Malonyl-3Glc] <sup>-</sup> ,<br>459.3882[M-H-Malonyl-4Glc] <sup>-</sup>                                                                                                                                                     | Malonyl-ginsenosid<br>e Rb <sub>1</sub> isomer           |
| R480 | 21.93 | C <sub>51</sub> H <sub>84</sub> O <sub>19</sub>  | 1045.5594 <sup>b</sup> | 1.05  | 1003.4670[M-H-Ac] <sup>-</sup> ,<br>959.5528[M-H-Malonyl] <sup>-</sup> ,<br>841.4089[M-H-Ac-Glc] <sup>-</sup>                                                                                                                                                                                                                                                              | Dehydrogenated-pr<br>otopanaxatriol+2Glc<br>+Malonyl Glc |



|      |       |                                                 |           |       |                                                                                                                                                                                                                                                                           |                                                                                                          |
|------|-------|-------------------------------------------------|-----------|-------|---------------------------------------------------------------------------------------------------------------------------------------------------------------------------------------------------------------------------------------------------------------------------|----------------------------------------------------------------------------------------------------------|
|      |       |                                                 |           |       | 797.5042[M-H-Malonyl-Glc] <sup>-</sup> ,                                                                                                                                                                                                                                  |                                                                                                          |
|      |       |                                                 |           |       | 779.4867[M-H-Malonyl-Glc-H <sub>2</sub> O] <sup>-</sup> ,                                                                                                                                                                                                                 |                                                                                                          |
|      |       |                                                 |           |       | 635.4540[M-H-Malonyl-2Glc] <sup>-</sup> ,                                                                                                                                                                                                                                 |                                                                                                          |
|      |       |                                                 |           |       | 473.4049[M-H-Malonyl-3Glc] <sup>-</sup>                                                                                                                                                                                                                                   |                                                                                                          |
| R481 | 21.95 | C <sub>52</sub> H <sub>86</sub> O <sub>20</sub> | 1029.5641 | 0.68  | 945.5437[M-H-2Ac] <sup>-</sup> ,<br>783.4911[M-H-2Ac-Glc] <sup>-</sup> ,<br>621.4375[M-H-2Ac-2Glc] <sup>-</sup> ,<br>459.3823[M-H-2Ac-3Glc] <sup>-</sup>                                                                                                                  | Acetyl-pseudoginsenoside RC <sub>1</sub>                                                                 |
| R482 | 21.96 | C <sub>58</sub> H <sub>96</sub> O <sub>24</sub> | 1175.6223 | 0.85  | 1107.5973[M-H-(E)-but-2-enoyl] <sup>-</sup> ,<br>945.5471[M-H-(E)-but-2-enoyl-Glc] <sup>-</sup> ,<br>783.4863[M-H-(E)-but-2-enoyl-2Glc] <sup>-</sup> ,<br>621.4360[M-H-(E)-but-2-enoyl-3Glc] <sup>-</sup> ,<br>459.3829[M-H-(E)-but-2-enoyl-4Glc] <sup>-</sup>            | Ginsenoside Ra <sub>6</sub> isomer                                                                       |
| R483 | 21.96 | C <sub>57</sub> H <sub>94</sub> O <sub>23</sub> | 1145.6112 | 0.35  | 1077.5985[M-H-(E)-but-2-enoyl] <sup>-</sup> ,<br>945.5368[M-H-(E)-but-2-enoyl-Ara] <sup>-</sup> ,<br>783.4862[M-H-(E)-but-2-enoyl-Ara-Glc] <sup>-</sup> ,<br>621.4388[M-H-(E)-but-2-enoyl-Ara-2Glc] <sup>-</sup> ,<br>459.3850[M-H-(E)-but-2-enoyl-Ara-3Glc] <sup>-</sup> | Ginsenoside Ra <sub>7</sub> isomer/Ginsenoside Ra <sub>8</sub> isomer/Ginsenoside Ra <sub>9</sub> isomer |
| R484 | 21.99 | C <sub>57</sub> H <sub>94</sub> O <sub>25</sub> | 1177.6014 | 0.68  | 945.5462[M-H-Malonyl-Rha] <sup>-</sup> ,<br>783.4944[M-H-Malonyl-Rha-Glc] <sup>-</sup> ,<br>621.4376[M-H-Malonyl-Rha-2Glc] <sup>-</sup> ,<br>459.3835[M-H-Malonyl-Rha-3Glc] <sup>-</sup>                                                                                  | Protopanaxadiol+ Rha+2Glc+ Malonyl Glc                                                                   |
| R485 | 22.03 | C <sub>57</sub> H <sub>94</sub> O <sub>26</sub> | 1193.5934 | -1.76 | 1107.5944[M-H-Malonyl] <sup>-</sup> ,<br>945.5427[M-H-Malonyl-Glc] <sup>-</sup> ,<br>783.4875[M-H-Malonyl-2Glc] <sup>-</sup> ,<br>621.4416[M-H-Malonyl-3Glc] <sup>-</sup> ,<br>459.3840[M-H-Malonyl-4Glc] <sup>-</sup>                                                    | Malonyl-ginsenoside Rb <sub>1</sub> isomer                                                               |
| R486 | 22.05 | C <sub>57</sub> H <sub>94</sub> O <sub>23</sub> | 1145.6125 | 1.48  | 1077.5834[M-H-(E)-but-2-enoyl] <sup>-</sup> ,<br>945.5418[M-H-(E)-but-2-enoyl-Ara] <sup>-</sup> ,<br>783.4931[M-H-(E)-but-2-enoyl-Ara-Glc] <sup>-</sup> ,<br>621.4370[M-H-(E)-but-2-enoyl-Ara-2Glc] <sup>-</sup>                                                          | Ginsenoside Ra <sub>7</sub> /Ginsenoside Ra <sub>8</sub> /Ginsenoside Ra <sub>9</sub>                    |

|      |       |                                                  |                        |       |                                                                                                                                                                                                                                                                                  |                                          |
|------|-------|--------------------------------------------------|------------------------|-------|----------------------------------------------------------------------------------------------------------------------------------------------------------------------------------------------------------------------------------------------------------------------------------|------------------------------------------|
|      |       |                                                  |                        |       | c] <sup>-</sup> ,<br>459.3860[M-H-(E)-but-2-enoyl-Ara-3Glc]<br>c] <sup>-</sup>                                                                                                                                                                                                   |                                          |
| R487 | 22.06 | C <sub>58</sub> H <sub>96</sub> O <sub>25</sub>  | 1191.6167 <sup>b</sup> | 0.42  | 945.5418[M-H-(E)-but-2-enoyl-ara(f)] <sup>-</sup> ,<br>783.4931[M-H-(E)-but-2-enoyl-ara(f)-Glc] <sup>-</sup> ,<br>621.4370[M-H-(E)-but-2-enoyl-ara(f)-2Glc] <sup>-</sup> ,<br>459.3807[M-H-(E)-but-2-enoyl-ara(f)-3Glc] <sup>-</sup>                                             | (E)-but-2-enoyl-ginsenoside Rc           |
| R488 | 22.11 | C <sub>60</sub> H <sub>100</sub> O <sub>27</sub> | 1251.6375              | 0.08  | 1209.6157[M-H-Ac] <sup>-</sup> ,<br>1077.5813[M-H-Ac-Xyl] <sup>-</sup> ,<br>945.5343[M-H-Ac-Xyl- ara(p)] <sup>-</sup> ,<br>783.4904[M-H-Ac-Xyl- ara(p)-Glc] <sup>-</sup> ,<br>621.4333[M-H-Ac-Xyl- ara(p)-2Glc] <sup>-</sup> ,<br>459.3824[M-H-Ac-Xyl- ara(p)-3Glc] <sup>-</sup> | Ginsenoside Ras isomer                   |
| R489 | 22.11 | C <sub>52</sub> H <sub>86</sub> O <sub>20</sub>  | 1029.5642              | 0.78  | 945.5402[M-H-2Ac] <sup>-</sup> ,<br>783.4921[M-H-2Ac-Glc] <sup>-</sup> ,<br>621.4385[M-H-2Ac-2Glc] <sup>-</sup> ,<br>459.3853[M-H-2Ac-3Glc] <sup>-</sup>                                                                                                                         | Acetyl-pseudoginsenoside RC <sub>1</sub> |
| R490 | 22.12 | C <sub>53</sub> H <sub>86</sub> O <sub>22</sub>  | 1073.5535              | 0.28  | 987.5480[M-H-Malonyl] <sup>-</sup> ,<br>945.5433[M-H-Malonyl-Ac] <sup>-</sup> ,<br>783.4905[M-H-Malonyl-Ac-Glc] <sup>-</sup> ,<br>621.4371[M-H-Malonyl-Ac-2Glc] <sup>-</sup> ,<br>459.3823[M-H-Malonyl-Ac-3Glc] <sup>-</sup>                                                     | Acetyl malonyl-ginsenoside Rd            |
| R491 | 22.12 | C <sub>54</sub> H <sub>85</sub> O <sub>24</sub>  | 1117.5425              | -0.54 | 945.5449[M-H-2Malonyl] <sup>-</sup> ,<br>783.4940[M-H-2Malonyl-Glc] <sup>-</sup> ,<br>621.4393[M-H-2Malonyl-2Glc] <sup>-</sup> ,<br>459.3851[M-H-2Malonyl-3Glc] <sup>-</sup>                                                                                                     | Di-malonyl-ginsenoside Rd isomer         |
| R492 | 22.13 | C <sub>48</sub> H <sub>82</sub> O <sub>18</sub>  | 945.5445               | 2.33  | 783.4898[M-H-Glc] <sup>-</sup> ,<br>621.4384[M-H-2Glc] <sup>-</sup>                                                                                                                                                                                                              | Ginsenoside Rd isomer                    |

|      |       |                                                 |           |       |                                                                                                                                                                                                                                                                           |                                                                                                                      |
|------|-------|-------------------------------------------------|-----------|-------|---------------------------------------------------------------------------------------------------------------------------------------------------------------------------------------------------------------------------------------------------------------------------|----------------------------------------------------------------------------------------------------------------------|
|      |       |                                                 |           |       | 459.3847[M-H-3Glc] <sup>-</sup>                                                                                                                                                                                                                                           |                                                                                                                      |
| R493 | 22.13 | C <sub>49</sub> H <sub>78</sub> O <sub>19</sub> | 969.5058  | -0.10 | 807.4536[M-H-Glc] <sup>-</sup> ,<br>645.4028[M-H-2Glc] <sup>-</sup> ,<br>455.3528[M-H-2Glc-CH <sub>2</sub> -Glu A] <sup>-</sup>                                                                                                                                           | Ginsenoside Ro<br>methyl ester <sup>a</sup>                                                                          |
| R494 | 22.28 | C <sub>50</sub> H <sub>82</sub> O <sub>20</sub> | 1001.5319 | -0.20 | 915.5311[M-H-Malonyl] <sup>-</sup> ,<br>783.4914[M-H-Malonyl-Xyl] <sup>-</sup> ,<br>621.4337[M-H-Malonyl-Xyl-Glc] <sup>-</sup> ,<br>459.3815[M-H-Malonyl-Xyl-2Glc] <sup>-</sup>                                                                                           | Malonyl<br>-vina-ginsenoside<br>R <sub>16</sub> isomer                                                               |
| R495 | 22.30 | C <sub>55</sub> H <sub>92</sub> O <sub>23</sub> | 1119.5952 | -0.18 | 1077.5906[M-H-Ac] <sup>-</sup> ,<br>945.5430[M-H-Ac-Ara(p)] <sup>-</sup> ,<br>783.4906[M-H-Ac-Ara(p)-Glc] <sup>-</sup> ,<br>621.4373[M-H-Ac-Ara(p)-2Glc] <sup>-</sup> ,<br>459.3837[M-H-Ac-Ara(p)-3Glc] <sup>-</sup>                                                      | Ginsenoside Rs <sub>2</sub><br>isomer                                                                                |
| R496 | 22.36 | C <sub>51</sub> H <sub>84</sub> O <sub>21</sub> | 1031.5425 | -0.19 | 945.5389[M-H-Malonyl] <sup>-</sup> ,<br>783.4896[M-H-Malonyl-Glc] <sup>-</sup> ,<br>621.4376[M-H-Malonyl-2Glc] <sup>-</sup> ,<br>459.3835[M-H-Malonyl-3Glc] <sup>-</sup>                                                                                                  | Malonyl-ginsenosid<br>e Rd isomer                                                                                    |
| R497 | 22.37 | C <sub>57</sub> H <sub>94</sub> O <sub>23</sub> | 1145.6097 | -0.96 | 1077.5864[M-H-(E)-but-2-enoyl] <sup>-</sup> ,<br>945.5388[M-H-(E)-but-2-enoyl-Ara] <sup>-</sup> ,<br>783.4950[M-H-(E)-but-2-enoyl-Ara-Glc] <sup>-</sup> ,<br>621.4338[M-H-(E)-but-2-enoyl-Ara-2Glc] <sup>-</sup> ,<br>459.3842[M-H-(E)-but-2-enoyl-Ara-3Glc] <sup>-</sup> | Ginsenoside Ra <sub>7</sub><br>ismoer/Ginsenoside<br>Ra <sub>8</sub><br>isomer/Ginsenoside<br>Ra <sub>9</sub> isomer |
| R498 | 22.37 | C <sub>53</sub> H <sub>90</sub> O <sub>22</sub> | 1077.5835 | -0.93 | 945.5372[M-H-Xyl/Ara] <sup>-</sup> ,<br>783.4919[M-H-Xyl/Ara-Glc] <sup>-</sup> ,<br>621.4313[M-H-Xyl/Ara-2Glc] <sup>-</sup> ,<br>459.3854[M-H-Xyl/Ara-3Glc] <sup>-</sup>                                                                                                  | Ginsenoside Rc<br>isomer/Ginsenoside<br>Rb <sub>2</sub><br>isomer/Ginsenoside<br>Rb <sub>3</sub> isomer              |
| R499 | 22.37 | C <sub>50</sub> H <sub>84</sub> O <sub>19</sub> | 987.5544  | 1.52  | 945.5461[M-H-Ac] <sup>-</sup> ,<br>783.4906[M-H-Ac-Glc] <sup>-</sup> ,<br>621.4393[M-H-Ac-2Glc] <sup>-</sup> ,<br>459.3840[M-H-Ac-3Glc] <sup>-</sup>                                                                                                                      | Acetyl-ginsenoside<br>Rd                                                                                             |

|      |       |                                                 |                        |       |                                                                                                                                                                                                                                                                                                           |                                                                                                                                                                  |
|------|-------|-------------------------------------------------|------------------------|-------|-----------------------------------------------------------------------------------------------------------------------------------------------------------------------------------------------------------------------------------------------------------------------------------------------------------|------------------------------------------------------------------------------------------------------------------------------------------------------------------|
| R500 | 22.37 | C <sub>56</sub> H <sub>94</sub> O <sub>24</sub> | 1149.6062              | 0.43  | 1107.6040[M-H-Ac] <sup>-</sup> ,<br>945.5499[M-H-Ac-Glc] <sup>-</sup> ,<br><br>783.4938 [M-H-Ac-2Glc] <sup>-</sup> ,<br>621.4362[M-H-Ac-3Glc] <sup>-</sup> ,<br>459.3951[M-H-Ac-4Glc] <sup>-</sup>                                                                                                        | Quinquenoside R <sub>1</sub><br>isomer                                                                                                                           |
| R501 | 22.37 | C <sub>58</sub> H <sub>96</sub> O <sub>25</sub> | 1191.6171 <sup>b</sup> | 0.76  | 1077.5836[M-H-(E)-but-2-enoyl] <sup>-</sup> ,<br>945.5418[M-H-(E)-but-2-enoyl-ara/xyl] <sup>-</sup> ,<br><br>783.4931[M-H-(E)-but-2-enoyl-ara/xyl-<br>Glc] <sup>-</sup> ,<br>621.4370[M-H-(E)-but-2-enoyl-ara/xyl-<br>2Glc] <sup>-</sup> ,<br>459.3838[M-H-(E)-but-2-enoyl-ara/xyl-<br>3Glc] <sup>-</sup> | (E)-but-2-enoyl-ginsenoside R <sub>b2</sub><br>isomer/(E)-but-2-enoyl-ginsenoside R <sub>b3</sub><br>isomer/(E)-but-2-enoyl-ginsenoside R <sub>c</sub><br>isomer |
| R502 | 22.38 | C <sub>58</sub> H <sub>96</sub> O <sub>24</sub> | 1175.6224              | 0.94  | 1107.5970[M-H-(E)-but-2-enoyl] <sup>-</sup> ,<br>945.5442[M-H-(E)-but-2-enoyl-Glc] <sup>-</sup> ,<br>783.4881[M-H-(E)-but-2-enoyl-2Glc] <sup>-</sup> ,<br>621.4355[M-H-(E)-but-2-enoyl-3Glc] <sup>-</sup> ,<br>459.3817[M-H-(E)-but-2-enoyl-4Glc] <sup>-</sup>                                            | Ginsenoside R <sub>a6</sub><br>isomer                                                                                                                            |
| R503 | 22.42 | C <sub>42</sub> H <sub>72</sub> O <sub>12</sub> | 813.4995 <sup>b</sup>  | -0.61 | 621.4367[M-H-Rha] <sup>-</sup> ,<br>475.3790[M-H-2Rha] <sup>-</sup>                                                                                                                                                                                                                                       | Protopanaxatriol+2<br>Rha                                                                                                                                        |
| R504 | 22.43 | C <sub>48</sub> H <sub>76</sub> O <sub>19</sub> | 955.4916               | 1.36  | 793.4395[M-H-Glc] <sup>-</sup> ,<br>731.4410[M-H-Glc-CO <sub>2</sub> -H <sub>2</sub> O] <sup>-</sup> ,<br>613.3735[M-H-2Glc-H <sub>2</sub> O] <sup>-</sup> ,<br>569.3845[M-H-2Glc-H <sub>2</sub> O-CO <sub>2</sub> ] <sup>-</sup> ,<br>455.3530[M-H-2Glc-Glu A] <sup>-</sup>                              | Ginsenoside R <sub>o</sub><br>isomer                                                                                                                             |
| R505 | 22.43 | C <sub>42</sub> H <sub>66</sub> O <sub>14</sub> | 793.4387               | 1.64  | 631.3829[M-H-Glc] <sup>-</sup> ,<br>569.3837[M-H-Glc-H <sub>2</sub> O-CO <sub>2</sub> ] <sup>-</sup> ,<br>455.3611[M-H-Glc-Glu A] <sup>-</sup>                                                                                                                                                            | Zingibroside R <sub>1</sub><br>isomer                                                                                                                            |
| R506 | 22.45 | C <sub>50</sub> H <sub>84</sub> O <sub>19</sub> | 987.5532               | 0.30  | 945.5412[M-H-Ac] <sup>-</sup> ,<br>783.4760[M-H-Ac-Glc] <sup>-</sup> ,<br>621.4381[M-H-Ac-2Glc] <sup>-</sup> ,<br>459.3845[M-H-Ac-3Glc] <sup>-</sup>                                                                                                                                                      | Acetyl-ginsenoside<br>R <sub>d</sub>                                                                                                                             |

|      |       |                                                 |                        |       |                                                                                                                                                                                                                                                                           |                                                                                       |
|------|-------|-------------------------------------------------|------------------------|-------|---------------------------------------------------------------------------------------------------------------------------------------------------------------------------------------------------------------------------------------------------------------------------|---------------------------------------------------------------------------------------|
| R507 | 22.47 | C <sub>52</sub> H <sub>86</sub> O <sub>20</sub> | 1029.5635              | 0.10  | 945.5447[M-H-2Ac] <sup>-</sup> ,<br>783.4893[M-H-2Ac-Glc] <sup>-</sup> ,<br>621.4305[M-H-2Ac-2Glc] <sup>-</sup> ,<br>459.3837[M-H-2Ac-3Glc] <sup>-</sup>                                                                                                                  | Acetyl-pseudoginsenoside RC <sub>1</sub>                                              |
| R508 | 22.51 | C <sub>53</sub> H <sub>86</sub> O <sub>22</sub> | 1073.5536              | 0.37  | 945.5449[M-H-Malonyl-Ac] <sup>-</sup> ,<br>783.4931[M-H-Malonyl-Ac-Glc] <sup>-</sup> ,<br>621.4382[M-H-Malonyl-Ac-2Glc] <sup>-</sup> ,<br>459.3879[M-H-Malonyl-Ac-3Glc] <sup>-</sup>                                                                                      | Acetyl malonyl-ginsenoside Rd                                                         |
| R509 | 22.51 | C <sub>54</sub> H <sub>85</sub> O <sub>24</sub> | 1117.5433              | 0.18  | 945.5372[M-H-2Malonyl] <sup>-</sup> ,<br>783.4890[M-H-2Malonyl-Glc] <sup>-</sup> ,<br>621.4385[M-H-2Malonyl-2Glc] <sup>-</sup> ,<br>459.3860[M-H-2Malonyl-3Glc] <sup>-</sup>                                                                                              | Di-malonyl-ginsenoside Rd isomer                                                      |
| R510 | 22.53 | C <sub>47</sub> H <sub>80</sub> O <sub>17</sub> | 915.5326               | 0.98  | 783.4955[M-H-Xyl] <sup>-</sup> ,<br>621.4334[M-H-Xyl-Glc] <sup>-</sup> ,<br>459.3295[M-H-Xyl-2Glc] <sup>-</sup>                                                                                                                                                           | Vina-ginsenoside R <sub>16</sub>                                                      |
| R511 | 22.55 | C <sub>57</sub> H <sub>94</sub> O <sub>23</sub> | 1145.6121              | 1.13  | 1077.5851[M-H-(E)-but-2-enoyl] <sup>-</sup> ,<br>945.5434[M-H-(E)-but-2-enoyl-Ara] <sup>-</sup> ,<br>783.4898[M-H-(E)-but-2-enoyl-Ara-Glc] <sup>-</sup> ,<br>621.4379[M-H-(E)-but-2-enoyl-Ara-2Glc] <sup>-</sup> ,<br>459.3846[M-H-(E)-but-2-enoyl-Ara-3Glc] <sup>-</sup> | Ginsenoside Ra <sub>7</sub> /Ginsenoside Ra <sub>8</sub> /Ginsenoside Ra <sub>9</sub> |
| R512 | 22.55 | C <sub>58</sub> H <sub>96</sub> O <sub>25</sub> | 1191.6162 <sup>b</sup> | 0.00  | 945.5433[M-H-(E)-but-2-enoyl-ara(p)] <sup>-</sup> ,<br>783.4919[M-H-(E)-but-2-enoyl-ara(p)-Glc] <sup>-</sup> ,<br>621.4395[M-H-(E)-but-2-enoyl-ara(p)-2Glc] <sup>-</sup> ,<br>459.3864[M-H-(E)-but-2-enoyl-ara(p)-3Glc] <sup>-</sup>                                      | (E)-but-2-enoyl-ginsenoside Rb <sub>2</sub>                                           |
| R513 | 22.56 | C <sub>53</sub> H <sub>90</sub> O <sub>22</sub> | 1077.5822              | -2.13 | 945.5389[M-H-Xyl/Ara] <sup>-</sup> ,<br>783.4933[M-H-Xyl/Ara-Glc] <sup>-</sup> ,<br>621.4375[M-H-Xyl/Ara-2Glc] <sup>-</sup> ,<br>459.3814[M-H-Xyl/Ara-3Glc] <sup>-</sup>                                                                                                  | Ginsenoside Rc isomer/Ginsenoside Rb <sub>2</sub> isomer/Ginsenoside                  |

|      |       |                                                  |           |       |                                                                                                                                                                                                                                                                                         | Rb <sub>3</sub> isomer                                                                                   |
|------|-------|--------------------------------------------------|-----------|-------|-----------------------------------------------------------------------------------------------------------------------------------------------------------------------------------------------------------------------------------------------------------------------------------------|----------------------------------------------------------------------------------------------------------|
| R514 | 22.56 | C <sub>51</sub> H <sub>84</sub> O <sub>21</sub>  | 1031.5422 | -0.48 | 945.5459[M-H-Malonyl],<br>783.4878[M-H-Malonyl-Glc],<br><br>621.4367[M-H-Malonyl-2Glc],<br>459.3848[M-H-Malonyl-3Glc]                                                                                                                                                                   | Malonyl-ginsenoside Rd isomer                                                                            |
| R515 | 22.60 | C <sub>52</sub> H <sub>86</sub> O <sub>20</sub>  | 1029.5637 | 0.29  | 945.5423[M-H-2Ac],<br>783.4902[M-H-2Ac-Glc],<br>621.4372[M-H-2Ac-2Glc],<br>459.3856[M-H-2Ac-3Glc]                                                                                                                                                                                       | Acetyl-pseudoginsenoside RC <sub>1</sub>                                                                 |
| R516 | 22.61 | C <sub>47</sub> H <sub>80</sub> O <sub>17</sub>  | 915.5327  | 1.09  | 783.4889[M-H-Xyl],<br>621.4374[M-H-Xyl-Glc],<br>459.3845[M-H-Xyl-2Glc]                                                                                                                                                                                                                  | Gypenoside IX                                                                                            |
| R517 | 22.63 | C <sub>54</sub> H <sub>90</sub> O <sub>24</sub>  | 1121.5752 | 0.71  | 1077.5817[M-H-CO <sub>2</sub> ],<br>945.5435[M-H-Glu A],<br><br>783.4898[M-H-Glu A-Glc],<br><br>621.4363[M-H-Glu A-2Glc],<br>459.3836[M-H-Glu A-3Glc]                                                                                                                                   | Protopanaxadiol+Glu A+3Glc                                                                               |
| R518 | 22.65 | C <sub>62</sub> H <sub>102</sub> O <sub>27</sub> | 1277.6528 | -0.16 | 1209.6270[M-H-(E)-but-2-enoyl],<br>1077.5861[M-H-(E)-but-2-enoyl-Xyl],<br><br>945.5403[M-H-(E)-but-2-enoyl-Xyl-ara(p)],<br><br>783.4887[M-H-(E)-but-2-enoyl-Xyl-ara(p)-Glc],<br><br>621.4301[M-H-(E)-but-2-enoyl-Xyl-ara(p)-2Glc],<br><br>459.3835[M-H-(E)-but-2-enoyl-Xyl-ara(p)-3Glc] | Ginsenoside Ra <sub>4</sub> isomer                                                                       |
| R519 | 22.67 | C <sub>57</sub> H <sub>94</sub> O <sub>23</sub>  | 1145.6122 | 1.22  | 1077.5808[M-H-(E)-but-2-enoyl],<br>945.5503[M-H-(E)-but-2-enoyl-Ara],<br>783.4907[M-H-(E)-but-2-enoyl-Ara-Glc],<br><br>621.4350[M-H-(E)-but-2-enoyl-Ara-2Glc],                                                                                                                          | Ginsenoside Ra <sub>7</sub> isomer/Ginsenoside Ra <sub>8</sub> isomer/Ginsenoside Ra <sub>9</sub> isomer |

|      |       |                                                 |                        |       |                                                                                                                                                                                                                                          |                                                                                                                                                      |
|------|-------|-------------------------------------------------|------------------------|-------|------------------------------------------------------------------------------------------------------------------------------------------------------------------------------------------------------------------------------------------|------------------------------------------------------------------------------------------------------------------------------------------------------|
|      |       |                                                 |                        |       | 459.3848[M-H-(E)-but-2-enoyl-Ara-3Glc] <sup>-</sup>                                                                                                                                                                                      |                                                                                                                                                      |
| R520 | 22.67 | C <sub>48</sub> H <sub>82</sub> O <sub>18</sub> | 945.5441               | 1.90  | 783.4864[M-H-Glc] <sup>-</sup> ,<br>621.4418[M-H-2Glc] <sup>-</sup> ,<br>475.3783[M-H-2Glc-Rha] <sup>-</sup>                                                                                                                             | Protopanaxatriol+2<br>Glc+Rha                                                                                                                        |
| R521 | 22.67 | C <sub>58</sub> H <sub>96</sub> O <sub>25</sub> | 1191.6171 <sup>b</sup> | 0.76  | 945.5412[M-H-(E)-but-2-enoyl-ara/xyl] <sup>-</sup> ,<br>783.4940[M-H-(E)-but-2-enoyl-ara/xyl-Glc] <sup>-</sup> ,<br>621.4380[M-H-(E)-but-2-enoyl-ara/xyl-2Glc] <sup>-</sup> ,<br>459.3842[M-H-(E)-but-2-enoyl-ara/xyl-3Glc] <sup>-</sup> | (E)-but-2-enoyl-ginsenoside Rb <sub>2</sub><br>isomer/(E)-but-2-enoyl-ginsenoside Rb <sub>3</sub><br>isomer/(E)-but-2-enoyl-ginsenoside Rc<br>isomer |
| R522 | 22.70 | C <sub>50</sub> H <sub>82</sub> O <sub>20</sub> | 1001.5319              | -0.20 | 915.5315[M-H-Malonyl] <sup>-</sup> ,<br>783.4921[M-H-Malonyl-Xyl] <sup>-</sup> ,<br>621.4342[M-H-Malonyl-Xyl-Glc] <sup>-</sup> ,<br>459.3807[M-H-Malonyl-Xyl-2Glc] <sup>-</sup>                                                          | Malonyl-vina-ginsenoside R <sub>16</sub> isomer                                                                                                      |
| R523 | 22.71 | C <sub>42</sub> H <sub>72</sub> O <sub>14</sub> | 799.4841               | -0.38 | 637.4297[M-H-Glc] <sup>-</sup> ,<br>475.3792[M-H-2Glc] <sup>-</sup>                                                                                                                                                                      | Ginsenoside Rf<br>isomer                                                                                                                             |
| R524 | 22.72 | C <sub>47</sub> H <sub>80</sub> O <sub>17</sub> | 915.5322               | 0.55  | 783.4983[M-H-Ara(f)] <sup>-</sup> ,<br>621.4363[M-H-Ara(f)-Glc] <sup>-</sup> ,<br>459.3858[M-H-Ara(f)-2Glc] <sup>-</sup>                                                                                                                 | Notoginsenoside Fe                                                                                                                                   |
| R525 | 22.73 | C <sub>53</sub> H <sub>86</sub> O <sub>22</sub> | 1073.5533              | 0.09  | 945.5457[M-H-Malonyl-Ac] <sup>-</sup> ,<br>783.4878[M-H-Malonyl-Ac-Glc] <sup>-</sup> ,<br>621.4355[M-H-Malonyl-Ac-2Glc] <sup>-</sup> ,<br>459.3851[M-H-Malonyl-Ac-3Glc] <sup>-</sup>                                                     | Acetyl<br>malonyl-ginsenoside R <sub>d</sub>                                                                                                         |
| R526 | 22.75 | C <sub>42</sub> H <sub>66</sub> O <sub>14</sub> | 793.4390               | 2.02  | 631.3881[M-H-Glc] <sup>-</sup> ,<br>569.3845[M-H-Glc-H <sub>2</sub> O-CO <sub>2</sub> ] <sup>-</sup> ,<br>455.3521[M-H-Glc-Glu A] <sup>-</sup>                                                                                           | Zingibroside R <sub>1</sub><br>isomer                                                                                                                |
| R527 | 22.75 | C <sub>54</sub> H <sub>85</sub> O <sub>24</sub> | 1117.5438              | 0.63  | 945.5441[M-H-2Malonyl] <sup>-</sup>                                                                                                                                                                                                      | Di-malonyl-ginsenoside                                                                                                                               |

|      |       |                                                 |                        |       |                                                |                               |
|------|-------|-------------------------------------------------|------------------------|-------|------------------------------------------------|-------------------------------|
|      |       |                                                 |                        |       | 783.4939[M-H-2Malonyl-Glc],                    | side Rd isomer                |
|      |       |                                                 |                        |       | 621.4410[M-H-2Malonyl-2Glc],                   |                               |
|      |       |                                                 |                        |       | 459.3829[M-H-2Malonyl-3Glc]                    |                               |
| R528 | 22.76 | C <sub>52</sub> H <sub>86</sub> O <sub>19</sub> | 1013.5674              | -1.09 | 945.5330[M-H-( <i>E</i> )-but-2-enoyl],        | ( <i>E</i> )-But-2-enoyl      |
|      |       |                                                 |                        |       | 783.4898[M-H-( <i>E</i> )-but-2-enoyl-Glc],    | ginsenoside Rd                |
|      |       |                                                 |                        |       | 621.4398[M-H-( <i>E</i> )-but-2-enoyl-2Glc],   |                               |
|      |       |                                                 |                        |       | 459.3850[M-H-( <i>E</i> )-but-2-enoyl-3Glc],   |                               |
| R529 | 22.78 | C <sub>57</sub> H <sub>94</sub> O <sub>26</sub> | 1193.5935              | -1.68 | 1107.5873[M-H-Malonyl],                        | Malonyl-ginsenosid            |
|      |       |                                                 |                        |       | 945.5460[M-H-Malonyl-Glc],                     | e Rb <sub>1</sub> isomer      |
|      |       |                                                 |                        |       | 783.4899[M-H-Malonyl-2Glc],                    |                               |
|      |       |                                                 |                        |       | 621.4369[M-H-Malonyl-3Glc],                    |                               |
|      |       |                                                 |                        |       | 459.3852[M-H-Malonyl-4Glc]                     |                               |
| R530 | 22.78 | C <sub>50</sub> H <sub>82</sub> O <sub>20</sub> | 1001.5322              | 0.10  | 915.5314[M-H-Malonyl],                         | Malonyl-vina-ginse            |
|      |       |                                                 |                        |       | 783.4910[M-H-Malonyl-Xyl],                     | noside R <sub>16</sub>        |
|      |       |                                                 |                        |       | 621.4372[M-H-Malonyl-Xyl-Glc],                 |                               |
|      |       |                                                 |                        |       | 459.3824[M-H-Malonyl-Xyl-2Glc]                 |                               |
| R531 | 22.79 | C <sub>58</sub> H <sub>96</sub> O <sub>25</sub> | 1191.6167 <sup>b</sup> | 0.42  | 945.5385[M-H-( <i>E</i> )-but-2-enoyl-xyl],    | ( <i>E</i> )-but-2-enoyl-gins |
|      |       |                                                 |                        |       | 783.4932[M-H-( <i>E</i> )-but-2-enoyl-xyl-Glc] | enoside Rb <sub>3</sub>       |
|      |       |                                                 |                        |       | ,                                              |                               |
|      |       |                                                 |                        |       | 621.4421[M-H-( <i>E</i> )-but-2-enoyl-xyl-2Gl  |                               |
|      |       |                                                 |                        |       | c],                                            |                               |
|      |       |                                                 |                        |       | 459.3813[M-H-( <i>E</i> )-but-2-enoyl-xyl-3Gl  |                               |
|      |       |                                                 |                        |       | c]                                             |                               |
| R532 | 22.79 | C <sub>36</sub> H <sub>60</sub> O <sub>9</sub>  | 681.4217 <sup>b</sup>  | 0.44  | 473.3655[M-H-Glc]                              | Ginsenoside Rh <sub>8</sub>   |
| R533 | 22.80 | C <sub>53</sub> H <sub>88</sub> O <sub>23</sub> | 1091.5618              | -1.83 | 945.5430[M-H-Rha],                             | Protopanaxadiol+R             |
|      |       |                                                 |                        |       | 783.4880[M-H-Rha-Glc],                         | ha+3Glc                       |
|      |       |                                                 |                        |       | 621.4366[M-H-Rha-2Glc],                        |                               |
|      |       |                                                 |                        |       | 459.3823[M-H-Rha-3Glc]                         |                               |
| R534 | 22.82 | C <sub>54</sub> H <sub>92</sub> O <sub>23</sub> | 1107.5934              | -1.53 | 945.5362[M-H-Glc],                             | Ginsenoside Rb <sub>1</sub>   |
|      |       |                                                 |                        |       | 783.4901[M-H-2Glc],                            | isomer                        |



|      |       |                                                  |                        |       |                                                                                                                                                                                                                                                                          |                                                                                             |
|------|-------|--------------------------------------------------|------------------------|-------|--------------------------------------------------------------------------------------------------------------------------------------------------------------------------------------------------------------------------------------------------------------------------|---------------------------------------------------------------------------------------------|
|      |       |                                                  |                        |       | 621.4373[M-H-3Glc] <sup>-</sup> ,<br>459.3844[M-H-4Glc] <sup>-</sup>                                                                                                                                                                                                     |                                                                                             |
| R535 | 22.84 | C <sub>50</sub> H <sub>84</sub> O <sub>19</sub>  | 987.5537               | 0.81  | 945.5444[M-H-Ac] <sup>-</sup> ,<br>783.4902[M-H-Ac-Glc] <sup>-</sup> ,<br>621.4377[M-H-Ac-2Glc] <sup>-</sup> ,<br>459.3849[M-H-Ac-3Glc] <sup>-</sup>                                                                                                                     | Acetyl-ginsenoside<br>Rd                                                                    |
| R536 | 22.84 | C <sub>47</sub> H <sub>80</sub> O <sub>17</sub>  | 915.5327               | 1.09  | 783.4981[M-H-Xyl] <sup>-</sup> ,<br>621.4362[M-H-Ara(f)-Glc] <sup>-</sup> ,<br>459.3819[M-H-Ara(f)-2Glc] <sup>-</sup>                                                                                                                                                    | Gypenoside IX<br>isomer/<br>Notoginsenoside Fe<br>isomer                                    |
| R537 | 22.85 | C <sub>62</sub> H <sub>102</sub> O <sub>27</sub> | 1277.6500              | -2.35 | 945.5450[M-H-(E)-but-2-enoyl-Xyl-<br>ara(p)] <sup>-</sup> ,<br>783.4922[M-H-(E)-but-2-enoyl-Xyl-<br>ara(p)-Glc] <sup>-</sup> ,<br>621.4388[M-H-(E)-but-2-enoyl-Xyl-<br>ara(p)-2Glc] <sup>-</sup> ,<br>459.3835[M-H-(E)-but-2-enoyl-Xyl-<br>ara(p)-3Glc] <sup>-</sup>     | Ginsenoside Ra <sub>4</sub><br>isomer                                                       |
| R538 | 22.85 | C <sub>58</sub> H <sub>96</sub> O <sub>24</sub>  | 1175.6233              | 1.70  | 1107.5968[M-H-(E)-but-2-enoyl] <sup>-</sup> ,<br>945.5483[M-H-(E)-but-2-enoyl-Glc] <sup>-</sup> ,<br>783.4868[M-H-(E)-but-2-enoyl-2Glc] <sup>-</sup> ,<br>621.4406[M-H-(E)-but-2-enoyl-3Glc] <sup>-</sup> ,<br>459.3838[M-H-(E)-but-2-enoyl-4Glc] <sup>-</sup>           | Ginsenoside Ra <sub>6</sub><br>isomer                                                       |
| R539 | 22.87 | C <sub>42</sub> H <sub>72</sub> O <sub>13</sub>  | 783.4906               | 1.40  | 621.4398[M-H-Glc] <sup>-</sup> ,<br>475.3793[M-H-Rha-Glc] <sup>-</sup>                                                                                                                                                                                                   | Ginsenoside Rg <sub>2</sub><br>isomer                                                       |
| R540 | 22.91 | C <sub>57</sub> H <sub>94</sub> O <sub>23</sub>  | 1145.6131              | 2.01  | 1077.5817[M-H-(E)-but-2-enoyl] <sup>-</sup> ,<br>945.5501[M-H-(E)-but-2-enoyl-Ara] <sup>-</sup> ,<br>783.4906[M-H-(E)-but-2-enoyl-Ara-Glc]<br>],<br>621.4371[M-H-(E)-but-2-enoyl-Ara-2Gl<br>c] <sup>-</sup> ,<br>459.3833[M-H-(E)-but-2-enoyl-Ara-3Gl<br>c] <sup>-</sup> | Ginsenoside<br>Ra <sub>7</sub> /Ginsenoside<br>Ra <sub>8</sub> /Ginsenoside Ra <sub>9</sub> |
| R541 | 22.91 | C <sub>58</sub> H <sub>96</sub> O <sub>25</sub>  | 1191.6168 <sup>b</sup> | 0.50  | 945.5497[M-H-(E)-but-2-enoyl-ara/xyl] <sup>-</sup><br>,<br>783.4883[M-H-(E)-but-2-enoyl-ara/xyl] <sup>-</sup>                                                                                                                                                            | (E)-but-2-enoyl-gins<br>enoside Rb <sub>2</sub><br>isomer/(E)-but-2-en                      |

|      |       |                                                 |            |       |                                                                                                                                                   |                                                                                                 |
|------|-------|-------------------------------------------------|------------|-------|---------------------------------------------------------------------------------------------------------------------------------------------------|-------------------------------------------------------------------------------------------------|
|      |       |                                                 |            |       | Glc],<br>621.4357<br>[M-H-( <i>E</i> )-but-2-enoyl-ara/xyl-2Glc],<br>459.3866[M-H-( <i>E</i> )-but-2-enoyl-ara/xyl-<br>3Glc]                      | oyl-ginsenoside Rb <sub>3</sub><br>isomer/( <i>E</i> )-but-2-en<br>oyl-ginsenoside Rc<br>isomer |
| R542 | 22.94 | C <sub>52</sub> H <sub>86</sub> O <sub>20</sub> | 1029.56733 | -0.10 | 945.5441[M-H-2Ac],<br>783.4896[M-H-2Ac-Glc],<br>621.4382[M-H-2Ac-2Glc],<br>459.3838[M-H-2Ac-3Glc]                                                 | Acetyl-pseudoginse<br>noside RC <sub>1</sub>                                                    |
| R543 | 23.04 | C <sub>48</sub> H <sub>82</sub> O <sub>17</sub> | 929.5483   | 0.97  | 767.4928[M-H-Glc],<br>621.4376[M-H-Glc-Rha],<br>459.3810[M-H-2Glc-Rha]                                                                            | Protopanaxadiol+<br>Rha+2Glc                                                                    |
| R544 | 23.11 | C <sub>55</sub> H <sub>92</sub> O <sub>23</sub> | 1119.5955  | 0.09  | 1077.5805[M-H-Ac],<br>945.5458[M-H-Ac-Ara(p)],<br>783.4879[M-H-Ac-Ara(p)-Glc],<br>621.439[M-H-Ac-Ara(p)-2Glc],<br>459.3823[M-H-Ac-Ara(p)-3Glc]    | Ginsenoside Rs <sub>2</sub><br>isomer                                                           |
| R545 | 23.14 | C <sub>50</sub> H <sub>84</sub> O <sub>19</sub> | 987.5541   | 1.22  | 945.5470[M-H-Ac],<br>783.4825[M-H-Ac-Glc],<br>621.4386[M-H-Ac-2Glc],<br>459.3846[M-H-Ac-3Glc]                                                     | Acetyl-ginsenoside<br>Rd                                                                        |
| R546 | 23.16 | C <sub>57</sub> H <sub>94</sub> O <sub>26</sub> | 1193.5955  | 0.00  | 1107.5906[M-H-Malonyl],<br>945.5380[M-H-Malonyl-Glc],<br>783.4918[M-H-Malonyl-2Glc],<br>621.4365[M-H-Malonyl-3Glc],<br>459.3841[M-H-Malonyl-4Glc] | Malonyl-ginsenosid<br>e Rb <sub>1</sub> isomer                                                  |
| R547 | 23.18 | C <sub>50</sub> H <sub>82</sub> O <sub>20</sub> | 1001.5325  | 0.40  | 915.5377[M-H-Malonyl],<br>783.4985[M-H-Malonyl-Xyl],<br>621.4335[M-H-Malonyl-Xyl-Glc],<br>459.3814[M-H-Malonyl-Xyl-2Glc]                          | Malonyl-vina-ginse<br>noside R <sub>16</sub> isomer                                             |
| R548 | 23.19 | C <sub>53</sub> H <sub>88</sub> O <sub>23</sub> | 1091.5658  | 1.83  | 945.5432[M-H-Rha],<br>783.4899[M-H-Rha-Glc],                                                                                                      | Protopanaxadiol+R<br>ha+3Glc                                                                    |

|      |       |                                                 |                        |       |                                                                                                                                                                                                                                                                           |                                                                                                                                                                  |
|------|-------|-------------------------------------------------|------------------------|-------|---------------------------------------------------------------------------------------------------------------------------------------------------------------------------------------------------------------------------------------------------------------------------|------------------------------------------------------------------------------------------------------------------------------------------------------------------|
|      |       |                                                 |                        |       | 621.4368[M-H-Rha-2Glc] <sup>-</sup> ,<br>459.3850[M-H-Rha-3Glc] <sup>-</sup>                                                                                                                                                                                              |                                                                                                                                                                  |
| R549 | 23.24 | C <sub>52</sub> H <sub>86</sub> O <sub>20</sub> | 1029.5638              | 0.39  | 987.5574[M-H-Ac] <sup>-</sup> ,<br>945.5454[M-H-2Ac] <sup>-</sup> ,<br>783.4882[M-H-2Ac-Glc] <sup>-</sup> ,<br>621.4359[M-H-2Ac-2Glc] <sup>-</sup> ,<br>459.3846[M-H-2Ac-3Glc] <sup>-</sup>                                                                               | Acetyl-pseudoginsenoside R <sub>C1</sub>                                                                                                                         |
| R550 | 23.24 | C <sub>53</sub> H <sub>86</sub> O <sub>22</sub> | 1073.5530              | -0.19 | 945.5417[M-H-Malonyl-Ac] <sup>-</sup> ,<br>783.4879[M-H-Malonyl-Ac-Glc] <sup>-</sup> ,<br>621.4317[M-H-Malonyl-Ac-2Glc] <sup>-</sup> ,<br>459.3862[M-H-Malonyl-Ac-3Glc] <sup>-</sup>                                                                                      | Acetyl malonyl-ginsenoside R <sub>d</sub>                                                                                                                        |
| R551 | 23.24 | C <sub>58</sub> H <sub>96</sub> O <sub>25</sub> | 1191.6168 <sup>b</sup> | 0.50  | 945.5501[M-H-(E)-but-2-enoyl-ara/xyl] <sup>-</sup> ,<br>,<br>783.4906[M-H-(E)-but-2-enoyl-ara/xyl-Glc] <sup>-</sup> ,<br>621.4371[M-H-(E)-but-2-enoyl-ara/xyl-2Glc] <sup>-</sup> ,<br>459.3833[M-H-(E)-but-2-enoyl-ara/xyl-3Glc] <sup>-</sup>                             | (E)-but-2-enoyl-ginsenoside R <sub>b2</sub><br>isomer/(E)-but-2-enoyl-ginsenoside R <sub>b3</sub><br>isomer/(E)-but-2-enoyl-ginsenoside R <sub>c</sub><br>isomer |
| R552 | 23.25 | C <sub>57</sub> H <sub>94</sub> O <sub>23</sub> | 1145.6136              | 2.44  | 1077.5845[M-H-(E)-but-2-enoyl] <sup>-</sup> ,<br>945.5438[M-H-(E)-but-2-enoyl-Ara] <sup>-</sup> ,<br>783.4897[M-H-(E)-but-2-enoyl-Ara-Glc] <sup>-</sup> ,<br>621.4393[M-H-(E)-but-2-enoyl-Ara-2Glc] <sup>-</sup> ,<br>459.3865[M-H-(E)-but-2-enoyl-Ara-3Glc] <sup>-</sup> | Ginsenoside R <sub>a7</sub><br>isomer/Ginsenoside R <sub>a8</sub><br>isomer/Ginsenoside R <sub>a9</sub> isomer                                                   |
| R553 | 23.25 | C <sub>51</sub> H <sub>84</sub> O <sub>19</sub> | 999.5533               | 0.40  | 915.5260[M-H-2Ac] <sup>-</sup> ,<br>783.4859[M-H-2Ac-Xyl] <sup>-</sup> ,<br>621.4383[M-H-2Ac-Xyl-Glc] <sup>-</sup> ,<br>459.3867[M-H-2Ac-Xyl-2Glc] <sup>-</sup>                                                                                                           | Diacetyl-vinaginsenoside R <sub>16</sub>                                                                                                                         |
| R554 | 23.26 | C <sub>50</sub> H <sub>82</sub> O <sub>20</sub> | 1001.5324              | 0.30  | 915.5379[M-H-Malonyl] <sup>-</sup> ,                                                                                                                                                                                                                                      | Malonyl-vinaginsenoside                                                                                                                                          |

|      |       |                                                 |                        |       |                                                                                                                                                                                                     |                                                                                             |
|------|-------|-------------------------------------------------|------------------------|-------|-----------------------------------------------------------------------------------------------------------------------------------------------------------------------------------------------------|---------------------------------------------------------------------------------------------|
|      |       |                                                 |                        |       | 783.4991[M-H-Malonyl-Xyl] <sup>-</sup> ,<br>621.4357[M-H-Malonyl-Xyl-Glc] <sup>-</sup> ,<br>459.3828[M-H-Malonyl-Xyl-2Glc] <sup>-</sup>                                                             | noside R <sub>16</sub> isomer                                                               |
| R555 | 23.26 | C <sub>54</sub> H <sub>90</sub> O <sub>24</sub> | 1121.5757              | 1.16  | 945.5435[M-H-Glu A] <sup>-</sup> ,<br>783.4855[M-H-Glu A-Glc] <sup>-</sup> ,<br>621.4413[M-H-Glu A-2Glc] <sup>-</sup> ,<br>459.3825[M-H-Glu A-3Glc] <sup>-</sup>                                    | Protopanaxadiol+Glu A+3Glc                                                                  |
| R556 | 23.36 | C <sub>42</sub> H <sub>70</sub> O <sub>12</sub> | 765.4795               | 0.78  | 619.4229[M-H-Rha] <sup>-</sup> ,<br>457.3707[M-H-Rha-Glc] <sup>-</sup>                                                                                                                              | Ginsenoside Rg <sub>6</sub> <sup>a</sup>                                                    |
| R557 | 23.38 | C <sub>42</sub> H <sub>66</sub> O <sub>14</sub> | 793.4376               | 0.25  | 631.3796[M-H-Glc] <sup>-</sup> ,<br>613.3732[M-H-Glc-H <sub>2</sub> O] <sup>-</sup> ,<br>569.3779[M-H-Glc-H <sub>2</sub> O-CO <sub>2</sub> ] <sup>-</sup> ,<br>455.3522[M-H-Glc-Glu A] <sup>-</sup> | Zingibroside R <sub>1</sub> isomer                                                          |
| R558 | 23.39 | C <sub>52</sub> H <sub>86</sub> O <sub>19</sub> | 1013.5671              | -1.38 | 783.4913[M-H-(E)-but-2-enoyl-Glc] <sup>-</sup> ,<br>459.3881[M-H-(E)-but-2-enoyl-3Glc] <sup>-</sup>                                                                                                 | (E)-But-2-enoyl ginsenoside Rd                                                              |
| R559 | 23.44 | C <sub>53</sub> H <sub>90</sub> O <sub>22</sub> | 1077.5827              | -1.67 | 945.5430[M-H-Xyl/Ara] <sup>-</sup> ,<br>783.4885[M-H-Xyl/Ara-Glc] <sup>-</sup> ,<br>621.4370[M-H-Xyl/Ara-2Glc] <sup>-</sup> ,<br>459.3825[M-H-Xyl/Ara-3Glc] <sup>-</sup>                            | Ginsenoside Rc isomer/Ginsenoside Rb <sub>2</sub> isomer/Ginsenoside Rb <sub>3</sub> isomer |
| R560 | 23.52 | C <sub>42</sub> H <sub>66</sub> O <sub>14</sub> | 793.4357               | -2.14 | 631.3824[M-H-Glc] <sup>-</sup> ,<br>569.3779[M-H-Glc-H <sub>2</sub> O-CO <sub>2</sub> ] <sup>-</sup> ,<br>455.3513[M-H-Glc-Glu A] <sup>-</sup>                                                      | Zingibroside R <sub>1</sub> isomer                                                          |
| R561 | 23.56 | C <sub>48</sub> H <sub>82</sub> O <sub>17</sub> | 929.5489               | 1.61  | 783.4911[M-H-Rha] <sup>-</sup> ,<br>621.4376[M-H-Rha-Glc] <sup>-</sup> ,<br>459.3846[M-H-Rha-2Glc] <sup>-</sup>                                                                                     | Protopanaxadiol+Rha+2Glc                                                                    |
| R562 | 23.57 | C <sub>42</sub> H <sub>72</sub> O <sub>14</sub> | 799.4846               | 0.25  | 637.4304[M-H-Glc] <sup>-</sup> ,<br>475.3803[M-H-2Glc] <sup>-</sup>                                                                                                                                 | Ginsenoside Rf isomer                                                                       |
| R563 | 23.58 | C <sub>58</sub> H <sub>96</sub> O <sub>25</sub> | 1191.6167 <sup>b</sup> | 0.42  | 945.5428[M-H-(E)-but-2-enoyl-ara/xyl] <sup>-</sup>                                                                                                                                                  | (E)-but-2-enoyl-gins                                                                        |

|      |       |                                                 |           |       |                                                                                                                                                                                                                                                                                                                        |                                                                                                                |
|------|-------|-------------------------------------------------|-----------|-------|------------------------------------------------------------------------------------------------------------------------------------------------------------------------------------------------------------------------------------------------------------------------------------------------------------------------|----------------------------------------------------------------------------------------------------------------|
|      |       |                                                 |           |       | ,                                                                                                                                                                                                                                                                                                                      | enoside Rb <sub>2</sub>                                                                                        |
|      |       |                                                 |           |       | 783.4925[M-H-( <i>E</i> )-but-2-enoyl-ara/xyl-Glc] <sup>-</sup> ,                                                                                                                                                                                                                                                      | isomer/( <i>E</i> )-but-2-enoyl-ginsenoside Rb <sub>3</sub>                                                    |
|      |       |                                                 |           |       | 621.4429[M-H-( <i>E</i> )-but-2-enoyl-ara/xyl-2Glc] <sup>-</sup> ,                                                                                                                                                                                                                                                     | isomer/( <i>E</i> )-but-2-enoyl-ginsenoside Rc                                                                 |
|      |       |                                                 |           |       | 459.3865[M-H-( <i>E</i> )-but-2-enoyl-ara/xyl-3Glc] <sup>-</sup>                                                                                                                                                                                                                                                       | isomer                                                                                                         |
| R564 | 23.60 | C <sub>57</sub> H <sub>94</sub> O <sub>23</sub> | 1145.6085 | -2.01 | 1077.5881[M-H-( <i>E</i> )-but-2-enoyl] <sup>-</sup> ,<br>945.5385[M-H-( <i>E</i> )-but-2-enoyl-Ara] <sup>-</sup> ,<br>783.4932[M-H-( <i>E</i> )-but-2-enoyl-Ara-Glc] <sup>-</sup> ,<br>621.4421[M-H-( <i>E</i> )-but-2-enoyl-Ara-2Glc] <sup>-</sup> ,<br>459.3815[M-H-( <i>E</i> )-but-2-enoyl-Ara-3Glc] <sup>-</sup> | Ginsenoside Ra <sub>7</sub><br>isomer/Ginsenoside Ra <sub>8</sub><br>isomer/Ginsenoside Ra <sub>9</sub> isomer |
| R565 | 23.61 | C <sub>50</sub> H <sub>84</sub> O <sub>18</sub> | 971.5586  | 0.72  | 929.5477[M-H-Ac] <sup>-</sup> ,<br>783.4919[M-H-Ac-Rha] <sup>-</sup> ,<br>621.4371[M-H-Ac-Rha-Glc] <sup>-</sup> ,<br>459.3843[M-H-Ac-Rha-2Glc] <sup>-</sup>                                                                                                                                                            | Protopanaxadiol+<br>Rha+Glc+Acetyl Glc                                                                         |
| R566 | 23.64 | C <sub>42</sub> H <sub>70</sub> O <sub>12</sub> | 765.4793  | 0.52  | 619.4216[M-H-Rha] <sup>-</sup> ,<br>457.3697[M-H-Rha-Glc] <sup>-</sup>                                                                                                                                                                                                                                                 | Ginsenoside F <sub>4</sub> <sup>a</sup>                                                                        |
| R567 | 23.64 | C <sub>52</sub> H <sub>86</sub> O <sub>19</sub> | 1013.5687 | 0.20  | 945.5403[M-H-( <i>E</i> )-but-2-enoyl] <sup>-</sup> ,<br>783.4888[M-H-( <i>E</i> )-but-2-enoyl-Glc] <sup>-</sup> ,<br>621.4343[M-H-( <i>E</i> )-but-2-enoyl-2Glc] <sup>-</sup> ,<br>459.3857[M-H-( <i>E</i> )-but-2-enoyl-3Glc] <sup>-</sup>                                                                           | ( <i>E</i> )-But-2-enoyl<br>ginsenoside Rd                                                                     |
| R568 | 23.66 | C <sub>50</sub> H <sub>84</sub> O <sub>18</sub> | 971.5580  | 0.10  | 929.5450[M-H-Ac] <sup>-</sup> ,<br>621.4362[M-H-Ac-Rha-Glc] <sup>-</sup> ,<br>459.3839[M-H-Ac-Rha-2Glc] <sup>-</sup>                                                                                                                                                                                                   | Protopanaxadiol+<br>Rha+Glc+Acetyl Glc                                                                         |
| R569 | 23.66 | C <sub>51</sub> H <sub>84</sub> O <sub>19</sub> | 999.5548  | 1.90  | 915.5387[M-H-2Ac] <sup>-</sup> ,<br>783.4864[M-H-2Ac-Xyl] <sup>-</sup> ,<br>621.4387[M-H-2Ac-Xyl-Glc] <sup>-</sup>                                                                                                                                                                                                     | Diacetyl-vina-ginse<br>noside R <sub>16</sub>                                                                  |

|      |       |                                                  |           |       |                                                                                                                                                                                                                                                                                                                           |                                                                                                         |
|------|-------|--------------------------------------------------|-----------|-------|---------------------------------------------------------------------------------------------------------------------------------------------------------------------------------------------------------------------------------------------------------------------------------------------------------------------------|---------------------------------------------------------------------------------------------------------|
|      |       |                                                  |           |       | 459.3829[M-H-2Ac-Xyl-2Glc] <sup>-</sup>                                                                                                                                                                                                                                                                                   |                                                                                                         |
| R570 | 23.67 | C <sub>62</sub> H <sub>102</sub> O <sub>27</sub> | 1277.6528 | -0.16 | 1077.5958[M-H-(E)-but-2-enoyl-Xyl] <sup>-</sup> ,<br>945.5408[M-H-(E)-but-2-enoyl-Xyl-<br>ara(p)] <sup>-</sup> ,<br>783.4843[M-H-(E)-but-2-enoyl-Xyl-<br>ara(p)-Glc] <sup>-</sup> ,<br>621.4289[M-H-(E)-but-2-enoyl-Xyl-<br>ara(p)-2Glc] <sup>-</sup> ,<br>459.3833[M-H-(E)-but-2-enoyl-Xyl-<br>ara(p)-3Glc] <sup>-</sup> | Ginsenoside Ra <sub>4</sub><br>isomer                                                                   |
| R571 | 23.73 | C <sub>48</sub> H <sub>82</sub> O <sub>18</sub>  | 945.5441  | 1.90  | 783.4854[M-H-Glc] <sup>-</sup> ,<br>621.4340[M-H-2Glc] <sup>-</sup> ,<br>459.3810[M-H-3Glc] <sup>-</sup>                                                                                                                                                                                                                  | Ginsenoside Rd<br>isomer                                                                                |
| R572 | 23.78 | C <sub>53</sub> H <sub>90</sub> O <sub>22</sub>  | 1077.5823 | -2.04 | 945.5441[M-H-Xyl/Ara] <sup>-</sup> ,<br>783.4904[M-H-Xyl/Ara-Glc] <sup>-</sup> ,<br>621.4366[M-H-Xyl/Ara-2Glc] <sup>-</sup> ,<br>459.3875[M-H-Xyl/Ara-3Glc] <sup>-</sup>                                                                                                                                                  | Ginsenoside Rc<br>isomer/Ginsenoside<br>Rb <sub>2</sub><br>isomer/Ginsenoside<br>Rb <sub>3</sub> isomer |
| R573 | 23.86 | C <sub>49</sub> H <sub>82</sub> O <sub>18</sub>  | 957.5411  | -1.25 | 915.5229[M-H-Ac] <sup>-</sup> ,<br>783.5002[M-H-Ac-Xyl] <sup>-</sup> ,<br>621.4393[M-H-Ac-Xyl-Glc] <sup>-</sup> ,<br>459.3856[M-H-Ac-Xyl-2Glc] <sup>-</sup>                                                                                                                                                               | Acetyl-vina-ginseno<br>side R <sub>16</sub>                                                             |
| R574 | 23.89 | C <sub>50</sub> H <sub>84</sub> O <sub>18</sub>  | 971.5565  | -1.44 | 929.5476[M-H-Ac] <sup>-</sup> ,<br>783.4915[M-H-Ac-Rha] <sup>-</sup> ,<br>621.4382[M-H-Ac-Rha-Glc] <sup>-</sup> ,<br>459.3851[M-H-Ac-Rha-2Glc] <sup>-</sup>                                                                                                                                                               | Protopanaxadiol+<br>Rha+Glc+Acetyl Glc                                                                  |
| R575 | 23.92 | C <sub>44</sub> H <sub>74</sub> O <sub>14</sub>  | 825.5002  | 0.24  | 783.4849[M-H-Ac] <sup>-</sup> ,<br>621.4310[M-H-Ac-Glc] <sup>-</sup> ,<br>459.3870[M-H-Ac-2Glc] <sup>-</sup>                                                                                                                                                                                                              | Acetyl-ginsenoside<br>Rg <sub>3</sub>                                                                   |
| R576 | 23.93 | C <sub>49</sub> H <sub>82</sub> O <sub>18</sub>  | 957.5415  | -0.84 | 915.5327[M-H-Ac] <sup>-</sup> ,<br>783.4895[M-H-Ac-Xyl] <sup>-</sup>                                                                                                                                                                                                                                                      | Acetyl-vina-ginseno<br>side R <sub>16</sub>                                                             |

|      |       |                                                 |                       |       |                                                                                                                                                                                                                           |                                                                                             |
|------|-------|-------------------------------------------------|-----------------------|-------|---------------------------------------------------------------------------------------------------------------------------------------------------------------------------------------------------------------------------|---------------------------------------------------------------------------------------------|
|      |       |                                                 |                       |       | 621.4369[M-H-Ac-Xyl-Glc] <sup>-</sup> ,<br>459.3841[M-H-Ac-Xyl-2Glc] <sup>-</sup>                                                                                                                                         |                                                                                             |
| R577 | 23.94 | C <sub>54</sub> H <sub>88</sub> O <sub>20</sub> | 1055.5774             | -1.61 | 945.5427[M-H-(E)-but-2-enoyl-Ac] <sup>-</sup> ,<br>783.4982[M-H-(E)-but-2-enoyl-Ac-Glc] <sup>-</sup> ,<br>,<br>621.4403[M-H-(E)-but-2-enoyl-Ac-2Glc] <sup>-</sup> ,<br>459.3823[M-H-(E)-but-2-enoyl-Ac-3Glc] <sup>-</sup> | (E)-But-2-enoyl-pseudoginsenoside RC <sub>1</sub>                                           |
| R578 | 23.99 | C <sub>48</sub> H <sub>82</sub> O <sub>18</sub> | 945.5440              | 1.80  | 783.4922[M-H-Glc] <sup>-</sup> ,<br>621.4371[M-H-2Glc] <sup>-</sup> ,<br>459.3831[M-H-3Glc] <sup>-</sup>                                                                                                                  | Ginsenoside Rd isomer                                                                       |
| R579 | 24.01 | C <sub>48</sub> H <sub>82</sub> O <sub>17</sub> | 975.5515 <sup>b</sup> | -1.44 | 783.4911[M-H-Rha] <sup>-</sup> ,<br>621.4363[M-H-Rha-Glc] <sup>-</sup> ,<br>459.3846[M-H-Rha-2Glc] <sup>-</sup>                                                                                                           | Protopanaxadiol+Rha+2Glc                                                                    |
| R580 | 24.03 | C <sub>42</sub> H <sub>66</sub> O <sub>14</sub> | 793.4370              | -0.50 | 631.3844[M-H-Glc] <sup>-</sup> ,<br>613.3732[M-H-Glc-H <sub>2</sub> O] <sup>-</sup> ,<br>569.3886[M-H-Glc-H <sub>2</sub> O-CO <sub>2</sub> ] <sup>-</sup> ,<br>455.3533[M-H-Glc-Glu A] <sup>-</sup>                       | Zingibroside R <sub>1</sub>                                                                 |
| R581 | 24.11 | C <sub>48</sub> H <sub>82</sub> O <sub>18</sub> | 945.5443              | 2.12  | 783.4846[M-H-Glc] <sup>-</sup> ,<br>621.4323[M-H-2Glc] <sup>-</sup> ,<br>475.3751[M-H-2Glc-Rha] <sup>-</sup>                                                                                                              | Protopanaxatriol+2Glc+Rha                                                                   |
| R582 | 24.12 | C <sub>47</sub> H <sub>74</sub> O <sub>18</sub> | 925.4802              | 0.54  | 793.4401[M-H-Xyl/Ara] <sup>-</sup> ,<br>763.4348[M-H-Glc] <sup>-</sup> ,<br>613.3751[M-H-Xyl/Ara-Glc-H <sub>2</sub> O] <sup>-</sup> ,<br>455.3525[M-H-Xyl/Ara-Glc-Glu A] <sup>-</sup>                                     | Pseudo-ginsenoside-RT <sub>1</sub> isomer/Chikusetsusaponin IV isomer                       |
| R583 | 24.18 | C <sub>53</sub> H <sub>90</sub> O <sub>22</sub> | 1077.5853             | 0.74  | 945.5417[M-H-Xyl/Ara] <sup>-</sup> ,<br>783.4888[M-H-Xyl/Ara-Glc] <sup>-</sup> ,<br>621.4379[M-H-Xyl/Ara-2Glc] <sup>-</sup> ,<br>459.3851[M-H-Xyl/Ara-3Glc] <sup>-</sup>                                                  | Ginsenoside Rc isomer/Ginsenoside Rb <sub>2</sub> isomer/Ginsenoside Rb <sub>3</sub> isomer |

|      |       |                                                 |                        |       |                                                                                                                                                                                                          |                                             |
|------|-------|-------------------------------------------------|------------------------|-------|----------------------------------------------------------------------------------------------------------------------------------------------------------------------------------------------------------|---------------------------------------------|
| R584 | 24.19 | C <sub>48</sub> H <sub>82</sub> O <sub>17</sub> | 975.5514 <sup>b</sup>  | -1.54 | 783.4980[M-H-Rha] <sup>-</sup> ,<br>621.4443[M-H-Rha-Glc] <sup>-</sup> ,<br>459.3860[M-H-Rha-2Glc] <sup>-</sup>                                                                                          | Protopanaxadiol+<br>Rha+2Glc                |
| R585 | 24.28 | C <sub>44</sub> H <sub>74</sub> O <sub>14</sub> | 825.5013               | 1.57  | 783.4891[M-H-Ac] <sup>-</sup> ,<br>621.4454[M-H-Ac-Glc] <sup>-</sup> ,<br>459.3877[M-H-Ac-2Glc] <sup>-</sup>                                                                                             | Acetyl-ginsenoside<br>Rg <sub>3</sub>       |
| R586 | 24.32 | C <sub>52</sub> H <sub>86</sub> O <sub>19</sub> | 1013.5699              | 1.38  | 945.5543[M-H-(E)-but-2-enoyl] <sup>-</sup> ,<br>783.4907[M-H-(E)-but-2-enoyl-Glc] <sup>-</sup> ,<br>621.4354[M-H-(E)-but-2-enoyl-2Glc] <sup>-</sup> ,<br>459.3846[M-H-(E)-but-2-enoyl-3Glc] <sup>-</sup> | (E)-But-2-enoyl<br>ginsenoside Rd           |
| R587 | 24.33 | C <sub>44</sub> H <sub>68</sub> O <sub>15</sub> | 835.4499               | 2.27  | 793.4344[M-H-Ac] <sup>-</sup> ,<br>631.3805[M-H-Ac-Glc] <sup>-</sup> ,<br>613.3746[M-H-Ac-Glc-H <sub>2</sub> O] <sup>-</sup> ,<br>455.3546[M-H-Ac-Glc-Glu A] <sup>-</sup>                                | Acetyl-chikusetsusa<br>ponin Iva            |
| R588 | 24.49 | C <sub>42</sub> H <sub>66</sub> O <sub>14</sub> | 793.4382               | 1.01  | 631.3908[M-H-Glc] <sup>-</sup> ,<br>613.3768[M-H-Glc-H <sub>2</sub> O] <sup>-</sup> ,<br>455.3523[M-H-Glc-Glu A] <sup>-</sup>                                                                            | Zingibroside R <sub>1</sub><br>isomer       |
| R589 | 24.57 | C <sub>44</sub> H <sub>74</sub> O <sub>14</sub> | 825.5001               | 0.12  | 783.4015[M-H-Ac] <sup>-</sup> ,<br>621.3644[M-H-Ac-Glc] <sup>-</sup> ,<br>459.3320[M-H-Ac-2Glc] <sup>-</sup>                                                                                             | Acetyl-ginsenoside<br>Rg <sub>3</sub>       |
| R590 | 24.61 | C <sub>50</sub> H <sub>84</sub> O <sub>18</sub> | 1017.5620 <sup>b</sup> | -1.38 | 929.5466[M-H-Ac] <sup>-</sup> ,<br>783.4886[M-H-Ac-Rha] <sup>-</sup> ,<br>621.4365[M-H-Ac-Rha-Glc] <sup>-</sup> ,<br>459.3849[M-H-Ac-Rha-2Glc] <sup>-</sup>                                              | Protopanaxadiol+<br>Rha+Glc+Acetyl Glc      |
| R591 | 24.65 | C <sub>42</sub> H <sub>70</sub> O <sub>13</sub> | 827.4807 <sup>b</sup>  | 1.69  | 619.4224[M-H-Glc] <sup>-</sup> ,<br>457.3675[M-H-2Glc] <sup>-</sup>                                                                                                                                      | Dehydrated-protop<br>anaxatriol+2Glc        |
| R592 | 24.66 | C <sub>49</sub> H <sub>82</sub> O <sub>18</sub> | 1003.5471 <sup>b</sup> | -0.73 | 915.5284[M-H-Ac] <sup>-</sup> ,<br>783.4954[M-H-Ac-Xyl] <sup>-</sup> ,<br>621.4387[M-H-Ac-Xyl-Glc] <sup>-</sup>                                                                                          | Acetyl-vina-ginseno<br>side R <sub>16</sub> |



|      |       |                                                 |           |       |                                                                                                                                                                                                                                                                          |                                                                                                                      |
|------|-------|-------------------------------------------------|-----------|-------|--------------------------------------------------------------------------------------------------------------------------------------------------------------------------------------------------------------------------------------------------------------------------|----------------------------------------------------------------------------------------------------------------------|
|      |       |                                                 |           |       | 459.3891[M-H-Ac-Xyl-2Glc] <sup>-</sup>                                                                                                                                                                                                                                   |                                                                                                                      |
| R593 | 24.68 | C <sub>42</sub> H <sub>72</sub> O <sub>13</sub> | 783.4900  | 0.64  | 621.4363[M-H-Glc] <sup>-</sup> ,<br>459.3862[M-H-2Glc] <sup>-</sup>                                                                                                                                                                                                      | Ginsenoside<br>20(S)-Rg <sub>3</sub> <sup>a</sup>                                                                    |
| R594 | 24.72 | C <sub>44</sub> H <sub>74</sub> O <sub>14</sub> | 825.4999  | -0.12 | 783.4898[M-H-Ac] <sup>-</sup> ,<br>621.4366[M-H-Ac-Glc] <sup>-</sup> ,<br>459.3855[M-H-Ac-2Glc] <sup>-</sup>                                                                                                                                                             | Acetyl-ginsenoside<br>Rg <sub>3</sub>                                                                                |
| R595 | 24.73 | C <sub>50</sub> H <sub>84</sub> O <sub>18</sub> | 971.5569  | -1.03 | 783.4908[M-H-Ac-Rha] <sup>-</sup> ,<br>621.4406[M-H-Ac-Rha-Glc] <sup>-</sup> ,<br>459.3844[M-H-Ac-Rha-2Glc] <sup>-</sup>                                                                                                                                                 | Protopanaxadiol+<br>Rha+Glc+Acetyl Glc                                                                               |
| R596 | 24.78 | C <sub>57</sub> H <sub>94</sub> O <sub>23</sub> | 1145.6096 | -1.05 | 1077.5804[M-H-(E)-but-2-enoyl] <sup>-</sup> ,<br>945.5497[M-H-(E)-but-2-enoyl-Ara] <sup>-</sup> ,<br>783.4883[M-H-(E)-but-2-enoyl-Ara-Glc]<br>],<br>621.4357[M-H-(E)-but-2-enoyl-Ara-2Gl<br>c] <sup>-</sup> ,<br>459.3866[M-H-(E)-but-2-enoyl-Ara-3Gl<br>c] <sup>-</sup> | Ginsenoside Ra <sub>7</sub><br>ismoer/Ginsenoside<br>Ra <sub>8</sub><br>isomer/Ginsenoside<br>Ra <sub>9</sub> isomer |
| R597 | 24.78 | C <sub>53</sub> H <sub>90</sub> O <sub>22</sub> | 1077.5824 | -1.95 | 945.5389[M-H-Xyl/Ara] <sup>-</sup> ,<br>783.4782[M-H-Xyl/Ara-Glc] <sup>-</sup> ,<br>621.4380[M-H-Xyl/Ara-2Glc] <sup>-</sup> ,<br>459.3843[M-H-Xyl/Ara-3Glc] <sup>-</sup>                                                                                                 | Ginsenoside Rc<br>isomer/Ginsenoside<br>Rb <sub>2</sub><br>isomer/Ginsenoside<br>Rb <sub>3</sub> isomer              |
| R598 | 24.80 | C <sub>48</sub> H <sub>82</sub> O <sub>17</sub> | 929.5462  | -1.29 | 783.4874[M-H-Rha] <sup>-</sup> ,<br>621.4382[M-H-Rha-Glc] <sup>-</sup> ,<br>459.3836[M-H-Rha-2Glc] <sup>-</sup>                                                                                                                                                          | Protopanaxadiol+<br>Rha+2Glc                                                                                         |
| R599 | 24.87 | C <sub>42</sub> H <sub>72</sub> O <sub>13</sub> | 783.4905  | 1.28  | 621.4341[M-H-Glc] <sup>-</sup> ,<br>459.3784[M-H-2Glc] <sup>-</sup>                                                                                                                                                                                                      | Ginsenoside<br>20(R)-Rg <sub>3</sub> <sup>a</sup>                                                                    |
| R600 | 24.90 | C <sub>56</sub> H <sub>94</sub> O <sub>24</sub> | 1149.6052 | -0.43 | 1107.5938[M-H-Ac] <sup>-</sup> ,<br>945.5446[M-H-Ac-Glc] <sup>-</sup> , 783.4897<br>[M-H-Ac-2Glc] <sup>-</sup> ,<br>621.4352[M-H-Ac-3Glc] <sup>-</sup> ,<br>459.3840[M-H-Ac-4Glc] <sup>-</sup>                                                                           | Quinquenoside R <sub>1</sub><br>isomer                                                                               |
| R601 | 24.90 | C <sub>44</sub> H <sub>74</sub> O <sub>14</sub> | 825.5005  | 0.61  | 783.4850[M-H-Ac] <sup>-</sup> ,                                                                                                                                                                                                                                          | Acetyl-ginsenoside                                                                                                   |

|      |       |                                                  |                       |       |                                                                                                                                                                                                                                                                                                             |                                    |
|------|-------|--------------------------------------------------|-----------------------|-------|-------------------------------------------------------------------------------------------------------------------------------------------------------------------------------------------------------------------------------------------------------------------------------------------------------------|------------------------------------|
|      |       |                                                  |                       |       | 621.4359[M-H-Ac-Glc] <sup>-</sup> ,<br>459.3834[M-H-Ac-2Glc] <sup>-</sup>                                                                                                                                                                                                                                   | Rg <sub>3</sub>                    |
| R602 | 24.92 | C <sub>42</sub> H <sub>70</sub> O <sub>13</sub>  | 827.4801 <sup>b</sup> | 0.97  | 619.4156[M-H-Glc] <sup>-</sup> ,<br>457.3686[M-H-2Glc] <sup>-</sup>                                                                                                                                                                                                                                         | Dehydrated-protopanaxatriol+2Glc   |
| R603 | 25.00 | C <sub>42</sub> H <sub>66</sub> O <sub>14</sub>  | 793.4385              | 1.39  | 631.3843[M-H-Glc] <sup>-</sup> ,<br>613.3739[M-H-Glc-H <sub>2</sub> O] <sup>-</sup> ,<br>569.3808[M-H-Glc-H <sub>2</sub> O-CO <sub>2</sub> ] <sup>-</sup> ,<br>455.3543[M-H-Glc-Glu A] <sup>-</sup>                                                                                                         | Zingibroside R <sub>1</sub> isomer |
| R604 | 25.09 | C <sub>44</sub> H <sub>74</sub> O <sub>14</sub>  | 825.5007              | 0.85  | 783.4950[M-H-Ac] <sup>-</sup> ,<br>621.4361[M-H-Ac-Glc] <sup>-</sup> ,<br>459.3793[M-H-Ac-2Glc] <sup>-</sup>                                                                                                                                                                                                | Acetyl-ginsenoside Rg <sub>3</sub> |
| R605 | 25.13 | C <sub>51</sub> H <sub>84</sub> O <sub>21</sub>  | 1031.5428             | 0.10  | 945.5349[M-H-Malonyl] <sup>-</sup> ,<br>783.4881[M-H-Malonyl-Glc] <sup>-</sup> ,<br>621.4369[M-H-Malonyl-2Glc] <sup>-</sup> ,<br>459.3839[M-H-Malonyl-3Glc] <sup>-</sup>                                                                                                                                    | Malonyl-ginsenoside Rd isomer      |
| R606 | 25.21 | C <sub>44</sub> H <sub>74</sub> O <sub>14</sub>  | 825.5006              | 0.73  | 783.4951[M-H-Ac] <sup>-</sup> ,<br>621.4360[M-H-Ac-Glc] <sup>-</sup> ,<br>459.3799[M-H-Ac-2Glc] <sup>-</sup>                                                                                                                                                                                                | Acetyl-ginsenoside Rg <sub>3</sub> |
| R607 | 25.48 | C <sub>41</sub> H <sub>70</sub> O <sub>12</sub>  | 753.4787              | -0.27 | 621.4398[M-H-Ara] <sup>-</sup> ,<br>459.3819[M-H-Ara-Glc] <sup>-</sup>                                                                                                                                                                                                                                      | Ginsenoside MC                     |
| R608 | 25.77 | C <sub>44</sub> H <sub>74</sub> O <sub>14</sub>  | 825.5009              | 1.09  | 783.4903[M-H-Ac] <sup>-</sup> ,<br>621.4368[M-H-Ac-Glc] <sup>-</sup> ,<br>459.3835[M-H-Ac-2Glc] <sup>-</sup>                                                                                                                                                                                                | Acetyl-ginsenoside Rg <sub>3</sub> |
| R609 | 25.87 | C <sub>65</sub> H <sub>100</sub> O <sub>21</sub> | 1215.6666             | -1.07 | 955.4909[M-H-Polyacetylene] <sup>-</sup> ,<br>793.4325[M-H-Polyacetylene-Glc] <sup>-</sup> ,<br>731.4387[M-H-Polyacetylene-Glc-CO <sub>2</sub> -H <sub>2</sub> O] <sup>-</sup> ,<br>613.3630[M-H-Polyacetylene-2Glc-H <sub>2</sub> O] <sup>-</sup> ,<br>455.3521[M-H-Polyacetylene-2Glc-Glu A] <sup>-</sup> | Polyacetyleneginsenoside-Ro isomer |

|      |       |                                                  |                       |       |                                                                                                                                                                                                                                                                                                             |                                    |
|------|-------|--------------------------------------------------|-----------------------|-------|-------------------------------------------------------------------------------------------------------------------------------------------------------------------------------------------------------------------------------------------------------------------------------------------------------------|------------------------------------|
| R610 | 25.95 | C <sub>42</sub> H <sub>70</sub> O <sub>13</sub>  | 827.4803 <sup>b</sup> | 1.21  | 619.4288[M-H-Glc] <sup>-</sup> ,<br>457.3708[M-H-2Glc] <sup>-</sup>                                                                                                                                                                                                                                         | Dehydrated-protopanaxatriol+2Glc   |
| R611 | 26.04 | C <sub>65</sub> H <sub>100</sub> O <sub>21</sub> | 1215.6681             | 0.16  | 955.4936[M-H-Polyacetylene] <sup>-</sup> ,<br>793.4349[M-H-Polyacetylene-Glc] <sup>-</sup> ,<br>731.4348[M-H-Polyacetylene-Glc--CO <sub>2</sub> -H <sub>2</sub> O] <sup>-</sup> ,<br>613.3741[M-H-Polyacetylene-2Glc-H <sub>2</sub> O] <sup>-</sup> ,<br>455.3537[M-H-Polyacetylene-2Glc-GluA] <sup>-</sup> | Polyacetyleneginsenoside-Ro isomer |
| R612 | 26.19 | C <sub>65</sub> H <sub>100</sub> O <sub>21</sub> | 1215.6685             | 0.49  | 955.4891[M-H-Polyacetylene] <sup>-</sup> ,<br>793.4378[M-H-Polyacetylene-Glc] <sup>-</sup> ,<br>731.4383[M-H-Polyacetylene-Glc--CO <sub>2</sub> -H <sub>2</sub> O] <sup>-</sup> ,<br>613.3792[M-H-Polyacetylene-2Glc-H <sub>2</sub> O] <sup>-</sup> ,<br>455.3537[M-H-Polyacetylene-2Glc-GluA] <sup>-</sup> | Polyacetyleneginsenoside-Ro        |
| R613 | 26.23 | C <sub>50</sub> H <sub>84</sub> O <sub>19</sub>  | 987.5533              | 0.41  | 621.4418[M-H-Ac-2Glc] <sup>-</sup> ,<br>459.3831[M-H-Ac-3Glc] <sup>-</sup>                                                                                                                                                                                                                                  | Acetyl-ginsenoside Rd              |
| R614 | 26.36 | C <sub>65</sub> H <sub>100</sub> O <sub>21</sub> | 1215.6683             | 0.33  | 955.4894[M-H-Polyacetylene] <sup>-</sup> ,<br>793.4391[M-H-Polyacetylene-Glc] <sup>-</sup> ,<br>455.3493[M-H-Polyacetylene-2Glc-GluA] <sup>-</sup>                                                                                                                                                          | Polyacetyleneginsenoside-Ro isomer |
| R615 | 26.67 | C <sub>36</sub> H <sub>62</sub> O <sub>8</sub>   | 621.4360              | -0.97 | 459.3872[M-H-Glc] <sup>-</sup>                                                                                                                                                                                                                                                                              | Ginsenoside Compound K             |
| R616 | 26.72 | C <sub>42</sub> H <sub>70</sub> O <sub>12</sub>  | 765.4795              | 0.78  | 603.4263[M-H-Glc] <sup>-</sup> ,<br>441.3346[M-H-2Glc] <sup>-</sup>                                                                                                                                                                                                                                         | Ginsenoside Rk1                    |
| R617 | 26.85 | C <sub>50</sub> H <sub>84</sub> O <sub>19</sub>  | 987.5538              | 0.91  | 945.5393[M-H-Ac] <sup>-</sup> ,<br>783.4979[M-H-Ac-Glc] <sup>-</sup> ,<br>621.4387[M-H-Ac-2Glc] <sup>-</sup> ,<br>459.3828[M-H-Ac-3Glc] <sup>-</sup>                                                                                                                                                        | Acetyl-ginsenoside Rd              |

|      |       |                                                 |          |       |                                                                     |                                                            |
|------|-------|-------------------------------------------------|----------|-------|---------------------------------------------------------------------|------------------------------------------------------------|
| R618 | 26.90 | C <sub>42</sub> H <sub>70</sub> O <sub>12</sub> | 765.4798 | 1.18  | 603.4271[M-H-Glc] <sup>-</sup> ,<br>441.3354[M-H-2Glc] <sup>-</sup> | Ginsenoside Rg5                                            |
| R619 | 27.14 | C <sub>36</sub> H <sub>62</sub> O <sub>8</sub>  | 621.4361 | -0.80 | 459.3809[M-H-Glc] <sup>-</sup>                                      | 20( <i>S</i> )-Ginsenoside<br>Rh <sub>2</sub> <sup>a</sup> |
| R620 | 27.27 | C <sub>36</sub> H <sub>62</sub> O <sub>8</sub>  | 621.4365 | -0.16 | 459.3870[M-H-Glc] <sup>-</sup>                                      | 20( <i>R</i> )-Ginsenoside<br>Rh <sub>2</sub> <sup>a</sup> |

*a*: Compound identified by comparison with the standard reference; *b*: [M-H+HAc]<sup>-</sup> ion.
